# Supplementary material for: Programmed synthesis of arylthiazoles through sequential C–H couplings
Source: Royal Society of Chemistry journal article supplement (doi:10.1039/c3sc52199k), 2013-09-17
Supplement: c3sc52199k.pdf [file c3sc52199k.pdf]

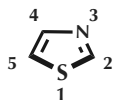

**Supporting Information (Tani, Uehara, Yamaguchi, Itami)**  
**Programmed Synthesis of Arylthiazoles through Sequential C–H Couplings**

Supporting Information

---

**Programmed Synthesis of Arylthiazoles through Sequential C–H Couplings**

Satoshi Tani, Takahiro N. Uehara, Junichiro Yamaguchi, and Kenichiro Itami\*

Institute of Transformative Bio-Molecules (WPI-ITbM) and Graduate School of Science, Nagoya University, Nagoya  
464-8602, Japan

E-mail: itami.kenichiro@a.mbox.nagoya-u.ac.jp

---

**Table of Contents**

|     |                                                    |          |
|-----|----------------------------------------------------|----------|
| 1.  | General                                            | S2       |
| 2.  | Assignment of Aryl Groups                          | S3       |
| 3.  | Synthesis of 2-Arylthiazoles                       | S4–S10   |
| 4.  | Synthesis of 5-Arylthiazoles                       | S11–S17  |
| 5.  | Synthesis of 4-Arylthiazoles                       | S18–S24  |
| 6.  | Synthesis of 2,5-Diarylthiazoles                   | S25–S35  |
| 7.  | Synthesis of 2,4-Diarylthiazoles                   | S36–S48  |
| 8.  | Synthesis of 4,5-Diarylthiazoles                   | S49–S56  |
| 9.  | Synthesis of Triarylthiazoles                      | S57–S74  |
| 10. | <sup>1</sup> H NMR and <sup>13</sup> C NMR spectra | S75–S400 |

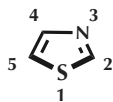

**Supporting Information (Tani, Uehara, Yamaguchi, Itami)**  
**Programmed Synthesis of Arylthiazoles through Sequential C–H Couplings**

## 1. General

Unless otherwise noted, all materials including dry solvents were obtained from commercial suppliers and used without further purification. Thiazole (**1**), Pd(OAc)<sub>2</sub>, 2,2'-bipyridyl, and Ni(OAc)<sub>2</sub>, PdCl<sub>2</sub>(dppf)·CH<sub>2</sub>Cl<sub>2</sub> were obtained from Wako Chemicals. Pd[(*i*-Bu)<sub>3</sub>]<sub>2</sub> was obtained from Strem Chemicals. PMe(*t*-Bu)<sub>2</sub>·HBF<sub>4</sub> was obtained from Sigma-Aldrich. PPh<sub>3</sub> was obtained from Nakarai Tesque. 4-Bromo-2-propylpyridine (**11**)<sup>[1]</sup>, diphenyl(thiazol-2-yl)methanol (**5**)<sup>[2]</sup>, [Pd(phen)<sub>2</sub>](PF<sub>6</sub>)<sub>2</sub><sup>[3]</sup>, Pd(bipy)Cl<sub>2</sub><sup>[4]</sup> was synthesized according to procedures reported in the literature. Unless otherwise noted, all reactions were performed with dry solvents under an atmosphere of argon in flame-dried glassware, using standard vacuum-line techniques. All work-up and purification procedures were carried out with reagent-grade solvents in air.

Analytical thin-layer chromatography (TLC) was performed using E. Merck silica gel 60 F<sub>254</sub> precoated plates (0.25 mm). The developed chromatogram was analyzed by UV lamp (254 nm) and ethanolic phosphomolybdic acid/sulfuric acid. Flash column chromatography was performed with E. Merck silica gel 60 (230–400 mesh). Preparative recycling gel permeation chromatography (GPC) was performed with a JAI LC-9204 instrument equipped with JAIGEL-1H/JAIGEL-2H columns using chloroform as an eluent. Preparative thin-layer chromatography (PTLC) was performed using Wako-gel<sup>®</sup> B5-F silica coated plates (0.75 mm) prepared in our laboratory. Chromatorex NH-DM1020 silica gel (Fuji Silysia Chemical Ltd., NH-silica) was used to remove remaining metal. Gas chromatography (GC) analysis was conducted on a Shimadzu GC-2010 instrument equipped with a HP-5 column (30 m × 0.25 mm, Hewlett-Packard). GC/MS analysis was conducted on a Shimadzu GCMS-QP2010 instrument equipped with a HP-5 column (30 m × 0.25 mm, Hewlett-Packard). High-resolution mass spectra (HRMS) were obtained from a JMS-T100TD (DART). Nuclear magnetic resonance (NMR) spectra were recorded on a JEOL JNM-ECA-600 (<sup>1</sup>H 600 MHz, <sup>13</sup>C 150 MHz) spectrometer. Chemical shifts for <sup>1</sup>H NMR are expressed in parts per million (ppm) relative to tetramethylsilane (δ 0.00 ppm). Chemical shifts for <sup>13</sup>C NMR are expressed in ppm relative to CDCl<sub>3</sub> (δ 77.0 ppm). Data are reported as follows: chemical shift, multiplicity (s = singlet, d = doublet, dd = doublet of doublets, t = triplet, q = quartet, m = multiplet, brs = broad signal), coupling constant (Hz), and integration.

[1] Comins, D. L.; Mantlo, N. B. *J. Org. Chem.* **1985**, *50*, 4410.

[2] Furukawa, H.; Matsumura, S.; Sugie, A.; Monguchi, D.; Mori, A. *Heterocycles* **2009**, *79*, 303.

[3] Bontempi, A.; Alessio, E.; Chanos, G.; Mestroni, G. *J. Mol. Catal.* **1987**, *42*, 67.

[4] Deshpande, R. M.; Diwakar, M. M.; Chaudhari, R. V. US20060142620

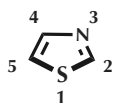

**Supporting Information (Tani, Uehara, Yamaguchi, Itami)**  
**Programmed Synthesis of Arylthiazoles through Sequential C–H Couplings**

**2. Assignment of Aryl Groups**

For simplification, we assigned each aryl groups alphabet as follows and used them in compound assignment.

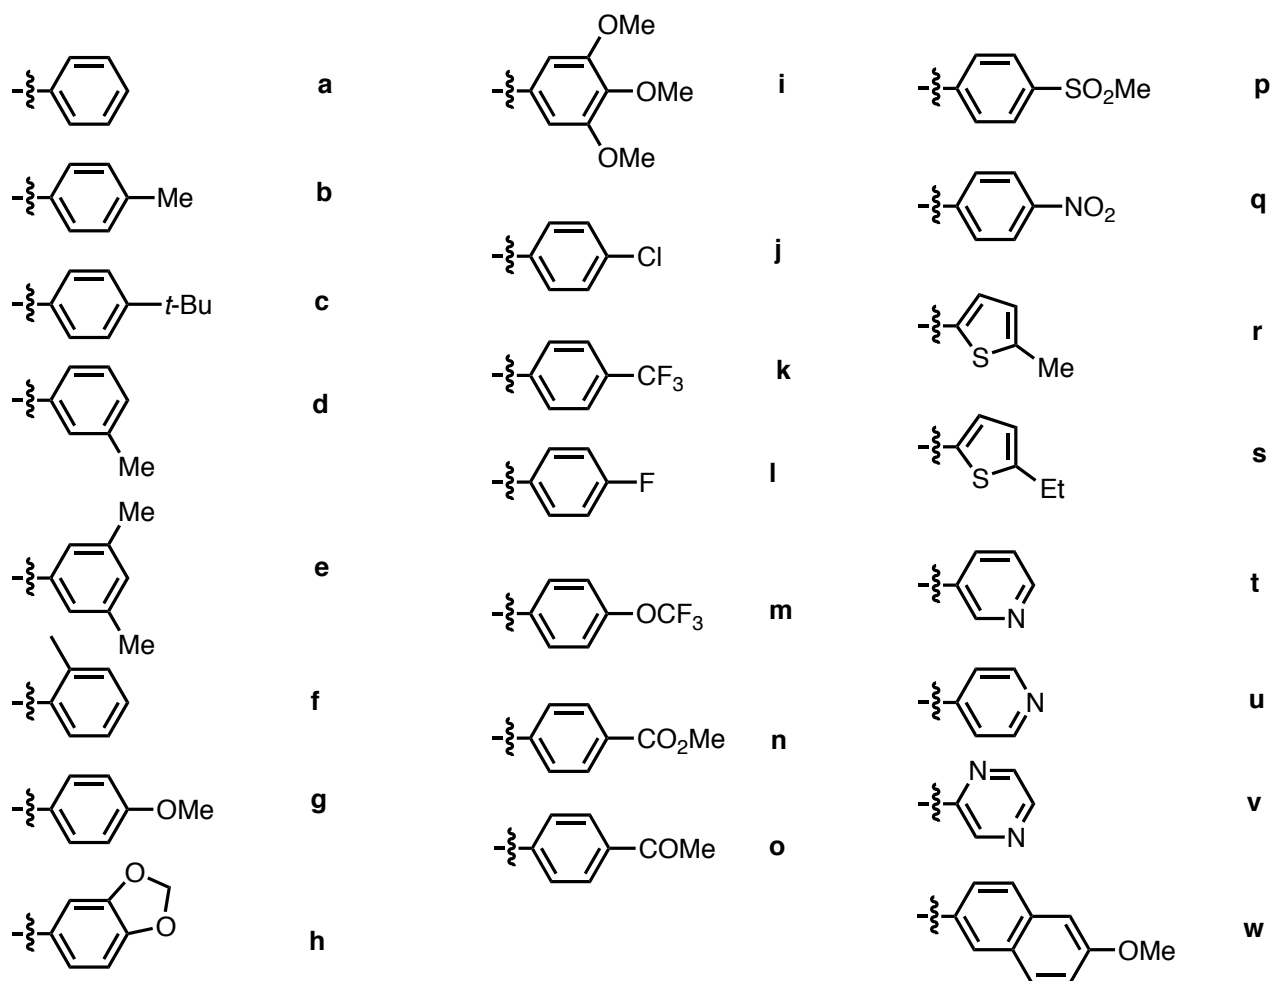

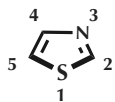

**Supporting Information (Tani, Uehara, Yamaguchi, Itami)**  
**Programmed Synthesis of Arylthiazoles through Sequential C–H Couplings**

### 3. Synthesis of 2-Arylthiazoles

#### 3.1 Screening of Reaction Conditions

**Table S1. Screening of Reaction Conditions**

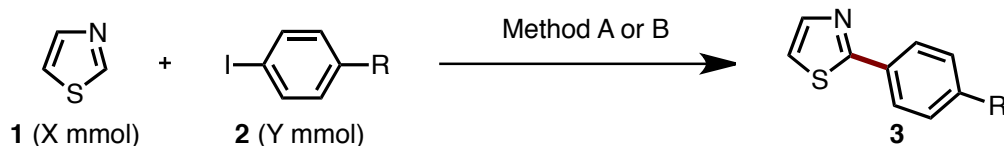

| Entry | Method | X   | Y   | R   | Yield [a]     |
|-------|--------|-----|-----|-----|---------------|
| 1     | A      | 0.8 | 0.4 | OMe | >99%(77% [c]) |
| 2     | A      | 0.6 | 0.4 | OMe | 89%           |
| 3 [b] | A      | 0.4 | 0.8 | OMe | 54%           |
| 4     | B      | 0.4 | 0.6 | H   | 21%           |
| 5     | B      | 0.6 | 0.4 | H   | 51%           |
| 6     | B      | 0.6 | 0.4 | H   | 63%(47% [c])  |

Method A: Pd(OAc)<sub>2</sub> (5 mol%), CuI (2.0 equiv), DMF (0.4 M), 140 °C, 16 h.

Method B: Ni(OAc)<sub>2</sub> (10 mol%), bipy (10 mol%), LiOt-Bu (2.0 equiv), 1,4-dioxane (0.4 M), 120 °C, 20 h.

a) GC yield. b) Reaction was conducted with 0.2 M solvent at 150 °C for 48 h.

c) Isolated yield.

#### Method A<sup>[5]</sup>

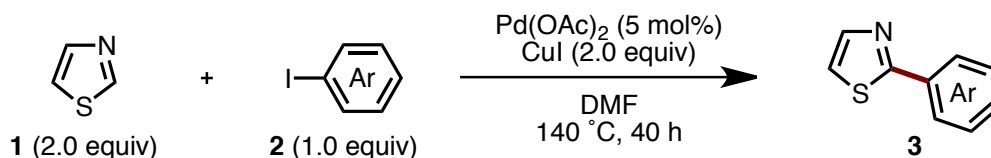

A 20-mL glass vessel equipped with J. Young® O-ring tap, containing a magnetic stirring bar, was flame-dried under vacuum and filled with argon after cooling to room temperature. To this vessel were added Pd(OAc)<sub>2</sub> (4.5 mg, 0.02 mmol, 5 mol%), CuI (152 mg, 0.8 mmol, 2.0 equiv), iodoarene **2** (0.4 mmol, 1.0 equiv), thiazole (**1**: 0.8 mmol, 68.1 mg, 2.0 equiv) and DMF (1.0 mL). The vessel was sealed and then stirred at 140 °C for 40 h. After cooling the reaction mixture to room temperature, the mixture was passed through a silica gel pad with EtOAc. The filtrate was evaporated and the residue was purified by PTLC to afford 2-arylthiazole **3**. For further purification, the obtained product **3** was passed through NH-silica gel pad (EtOAc) and then the residue was purified by GPC to afford desired product **3**.

#### Method B<sup>[6]</sup>

[5] Yamamoto, T.; Muto, K.; Komiyama, M.; Canivet, J.; Yamaguchi, J.; Itami, K. *Chem. Eur. J.* **2011**, *17*, 10113.

[6] Bellina, F.; Cauteruccio, S.; Rossi, R. *Eur. J. Org. Chem.* **2006**, 1379.

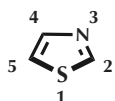

**Supporting Information (Tani, Uehara, Yamaguchi, Itami)**  
**Programmed Synthesis of Arylthiazoles through Sequential C–H Couplings**

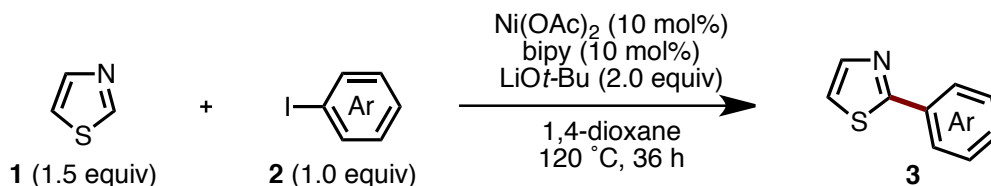

A 20-mL glass vessel equipped with J. Young® O-ring tap, containing a magnetic stirring bar and  $\text{Ni}(\text{OAc})_2 \cdot 4\text{H}_2\text{O}$  (10.0 mg, 0.04 mmol, 10 mol%), was flame-dried under vacuum and filled with argon after cooling to room temperature. To this vessel were added 2,2'-bipyridyl (bipy: 6.4 mg, 0.04 mmol, 10 mol%), sublimated  $\text{LiOt-Bu}$  (68.9 mg, 0.8 mmol, 2.0 equiv), iodoarene **2** (0.4 mmol, 1.0 equiv), thiazole (**1**: 0.6 mmol, 51.1 mg, 1.5 equiv) and 1,4-dioxane (1.0 mL) under a stream of argon. The vessel was sealed and then stirred at 120 °C for 36 h. After cooling the reaction mixture to room temperature, the mixture was passed through a short silica gel pad (EtOAc). The filtrate was evaporated and the residue was purified by PTLC to afford desired product **3**.

**Method C<sup>[7]</sup>**

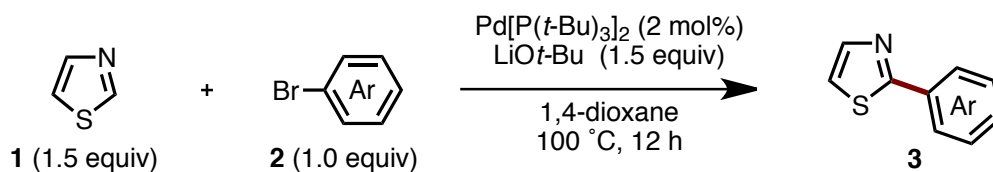

A 20-mL glass vessel equipped with J. Young® O-ring tap, containing a magnetic stirring bar, was flame-dried under vacuum and filled with argon after cooling to room temperature. To this vessel were added  $\text{Pd}[\text{P}(t\text{-Bu})_3]_2$  (4.4 mg, 0.008 mmol, 2 mol%),  $\text{LiOt-Bu}$  (48 mg, 0.6 mmol, 1.5 equiv), bromoarene **2** (0.4 mmol, 1.0 equiv), thiazole (**1**: 0.6 mmol, 51.1 mg, 1.5 equiv), and dry 1,4-dioxane (1.6 mL). The vessel was sealed and then stirred at 100 °C for 12 h. After cooling the reaction mixture to room temperature, the mixture was passed through a short silica gel pad (EtOAc). The filtrate was evaporated and the residue was purified by GPC and PTLC to afford desired product **3**.

**2-Phenylthiazole (3a)<sup>[6]</sup>**

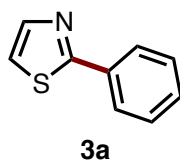

Purification by PTLC (hexane/EtOAc = 10:1) and GPC gave **3a** as a colorless oil (Method A: 93% yield, Method B: 61% yield).  $^1\text{H}$  NMR (600 MHz,  $\text{CDCl}_3$ )  $\delta$  7.31 (d,  $J$  = 3.0 Hz, 1H), 7.39–7.46 (m, 3H), 7.86 (d,  $J$  = 3.0 Hz, 1H), 7.97 (dd,  $J$  = 8.2, 2.0 Hz, 2H).  $^{13}\text{C}$  NMR (150 MHz,  $\text{CDCl}_3$ )  $\delta$  118.8, 126.6, 128.9, 129.9,

[7] Tamba, S.; Okubo, Y.; Tanaka, S.; Monguchi, D.; Mori, A. *J. Org. Chem.* **2010**, 75, 6998.

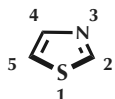

**Supporting Information (Tani, Uehara, Yamaguchi, Itami)**  
**Programmed Synthesis of Arylthiazoles through Sequential C–H Couplings**

133.6, 143.6, 168.4. HRMS (DART)  $m/z$  = 162.0377 calcd for  $C_9H_8NS$   $[M+H]^+$ , found: 162.0377.

**2-(4-Methylphenyl)thiazole (3b)<sup>[8]</sup>**

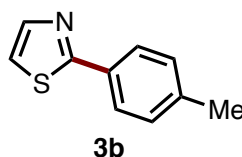

Purification by PTLC (hexane/EtOAc = 10:1) and GPC gave **3b** as a colorless oil (Method A: 84% yield).  $^1H$  NMR (600 MHz,  $CDCl_3$ )  $\delta$  2.39 (s, 3H), 7.25 (d,  $J$  = 8.2 Hz, 2H), 7.28 (d,  $J$  = 3.5 Hz, 1H), 7.84 (d,  $J$  = 3.5 Hz, 1H), 7.88 (d,  $J$  = 8.2 Hz, 2H).  $^{13}C$  NMR (150 MHz,  $CDCl_3$ )  $\delta$  21.4, 118.3, 126.5, 129.6, 130.9, 140.2, 143.5, 168.6. HRMS (DART)  $m/z$  = 176.0534 calcd for  $C_{10}H_{10}NS$   $[M+H]^+$ , found: 176.0534.

**2-(4-(*tert*-Butyl)phenyl)thiazole (3c)**

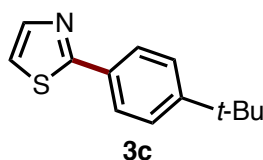

Purification by PTLC (hexane/EtOAc = 5:1) and GPC gave **3c** as a light yellow solid (Method A: 71% yield).  $^1H$  NMR (600 MHz,  $CDCl_3$ )  $\delta$  1.35 (s, 9H), 7.28 (d,  $J$  = 3.4 Hz, 1H), 7.46 (d,  $J$  = 8.6 Hz, 2H), 7.84 (d,  $J$  = 3.4 Hz, 1H), 7.90 (d,  $J$  = 8.6 Hz, 2H);  $^{13}C$  NMR (150 MHz,  $CDCl_3$ )  $\delta$  31.2, 34.8, 118.3, 125.9, 126.3, 130.9, 143.5, 153.3, 168.5; HRMS (DART)  $m/z$  = 218.1003 calcd for  $C_{13}H_{16}NS$   $[M+H]^+$ , found: 218.1006.

**2-(3,5-Dimethylphenyl)thiazole (3e)**

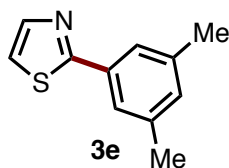

Purification by PTLC (hexane/EtOAc = 10:1) and GPC gave **3e** as a light yellow oil (Method A: 80% yield).  $^1H$  NMR (600 MHz,  $CDCl_3$ )  $\delta$  2.37 (s, 6H), 7.05 (s, 1H), 7.28 (d,  $J$  = 3.4 Hz, 1H), 7.59 (s, 2H), 7.84 (d,  $J$  = 3.4 Hz, 1H);  $^{13}C$  NMR (150 MHz,  $CDCl_3$ )  $\delta$  21.2, 118.5, 124.4, 131.7, 133.4, 138.6, 143.4, 168.8; HRMS (DART)  $m/z$  = 190.0690 calcd for  $C_{11}H_{12}NS$   $[M+H]^+$ , found: 190.0691.

**2-(2-Methylphenyl)thiazole (3f)<sup>[9]</sup>**

[8] Turner, G. L.; Morris, J. A.; Greaney, M. F. *Angew. Chem., Int. Ed.* **2007**, *46*, 7996.

[9] Feuerstein, M.; Doucet, H.; Santelli, M. J. *Organomet. Chem.* **2003**, *687*, 327.

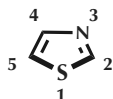

**Supporting Information (Tani, Uehara, Yamaguchi, Itami)**  
**Programmed Synthesis of Arylthiazoles through Sequential C–H Couplings**

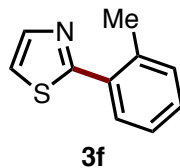

Purification by PTLC (hexane/EtOAc = 10:1) gave **3f** as a light yellow oil (Method B: 76% yield). <sup>1</sup>H NMR (600 MHz, CDCl<sub>3</sub>) δ 2.58 (s, 3H), 7.24–7.34 (m, 3H), 7.37 (d, *J* = 2.8 Hz, 1H), 7.71 (d, *J* = 7.6 Hz, 1H), 7.91 (d, *J* = 2.8 Hz, 1H). <sup>13</sup>C NMR (150 MHz, CDCl<sub>3</sub>) δ 21.3, 119.3, 126.0, 129.3, 130.0, 131.4, 132.9, 136.5, 142.9, 167.9. HRMS (DART) *m/z* = 176.0534 calcd for C<sub>10</sub>H<sub>10</sub>NS [M+H]<sup>+</sup>, found: 176.0533.

**2-(4-Methoxyphenyl)thiazole (3g)**<sup>[8]</sup>

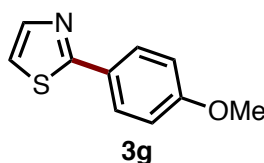

Purification by PTLC (hexane/EtOAc = 10:1) and GPC gave **3g** as a colorless oil (Method A: 77% yield). <sup>1</sup>H NMR (600 MHz, CDCl<sub>3</sub>) δ 3.83 (s, 3H), 6.94 (dt, *J* = 8.9, 2.4 Hz, 2H), 7.23 (d, *J* = 3.5 Hz, 1H), 7.79 (d, *J* = 3.5 Hz, 1H), 7.89 (dt, *J* = 8.9, 2.4 Hz, 2H). <sup>13</sup>C NMR (150 MHz, CDCl<sub>3</sub>) δ 55.3, 114.2, 117.8, 126.6, 128.0, 143.3, 161.0, 168.2. HRMS (DART) *m/z* = 192.0483 calcd for C<sub>10</sub>H<sub>10</sub>NOS [M+H]<sup>+</sup>, found: 192.0483.

**2-(Benzo[d][1,3]dioxol-5-yl)thiazole (3h)**<sup>[10]</sup>

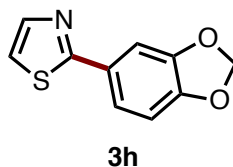

Purification by PTLC (hexane/EtOAc = 5:1) and GPC gave **3h** as a white solid (Method A: 77% yield). <sup>1</sup>H NMR (600 MHz, CDCl<sub>3</sub>) δ 6.01 (s, 2H), 6.85 (d, *J* = 8.3 Hz, 1H), 7.24 (d, *J* = 3.5 Hz, 1H), 7.44–7.48 (m, 2H), 7.79 (d, *J* = 3.5 Hz, 1H); <sup>13</sup>C NMR (150 MHz, CDCl<sub>3</sub>) δ 101.5, 106.8, 108.5, 118.0, 121.0, 128.1, 143.3, 148.2, 149.1, 168.0; HRMS (DART) *m/z* = 206.0276 calcd for C<sub>10</sub>H<sub>8</sub>NO<sub>2</sub>S [M+H]<sup>+</sup>, found: 206.0274.

**2-(3,4,5-Trimethoxyphenyl)thiazole (3i)**

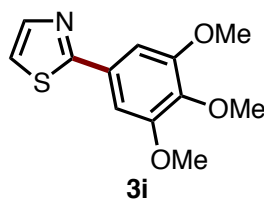

[10] Hwan, M. S.; Jin, C. H.; Jin, L. S.; Uk, C. J.; Ryul, H. J.; Won, J. K.; Woong, O. S. WO9955318



**Supporting Information (Tani, Uehara, Yamaguchi, Itami)**  
**Programmed Synthesis of Arylthiazoles through Sequential C–H Couplings**

Purification by GPC and then isolated product in  $\text{CHCl}_3$  was passed through NH-silica (EtOAc) gave **3i** as a yellow oil (Method C: 70% yield).  $^1\text{H}$  NMR (600 MHz,  $\text{CDCl}_3$ )  $\delta$  3.90 (s, 3H), 3.95 (s, 6H), 7.20 (s, 2H), 7.31 (d,  $J = 3.5$  Hz, 1H), 7.84 (d,  $J = 3.5$  Hz, 1H);  $^{13}\text{C}$  NMR (150 MHz,  $\text{CDCl}_3$ )  $\delta$  56.2, 60.9, 103.7, 118.6, 129.1, 139.7, 143.4, 153.5, 168.2; HRMS (DART)  $m/z = 252.0694$  calcd for  $\text{C}_{12}\text{H}_{14}\text{NO}_3\text{S}$   $[\text{M}+\text{H}]^+$ , found: 252.0696.

**2-(4-Chlorophenyl)thiazole (3j)<sup>[11]</sup>**

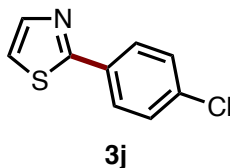

Purification by PTLC (hexane/EtOAc = 10:1) and GPC gave **3j** as a colorless oil (Method A: 88% yield).  $^1\text{H}$  NMR (600 MHz,  $\text{CDCl}_3$ )  $\delta$  7.34 (d,  $J = 3.4$  Hz, 1H), 7.41 (dt,  $J = 8.9, 2.1$  Hz, 2H), 7.86 (d,  $J = 3.4$  Hz, 1H), 7.90 (dt,  $J = 8.9, 2.1$  Hz, 2H).  $^{13}\text{C}$  NMR (150 MHz,  $\text{CDCl}_3$ )  $\delta$  119.1, 127.8, 129.2, 132.1, 135.9, 143.8, 167.0. HRMS (DART)  $m/z = 195.9888$  calcd for  $\text{C}_9\text{H}_6\text{ClNS}$   $[\text{M}+\text{H}]^+$ , found: 195.9989.

**2-(4-Trifluoromethylphenyl)thiazole (3k)<sup>[8]</sup>**

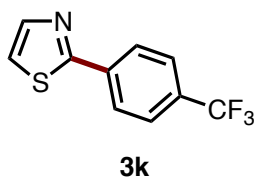

Purification by PTLC (hexane/EtOAc = 10:1) and GPC gave **3k** as a light yellow solid (Method A: 71% yield).  $^1\text{H}$  NMR (600 MHz,  $\text{CDCl}_3$ )  $\delta$  7.41 (d,  $J = 3.2$  Hz, 1H), 7.70 (d,  $J = 8.2$  Hz, 2H), 7.92 (d,  $J = 3.2$  Hz, 1H), 8.08 (d,  $J = 8.2$  Hz, 2H).  $^{13}\text{C}$  NMR (150 MHz,  $\text{CDCl}_3$ )  $\delta$  119.9, 123.9 (q,  $J_{\text{C-F}} = 270.3$  Hz), 126.0 (q,  $J_{\text{C-F}} = 4.3$  Hz), 126.8, 131.6 (q,  $J_{\text{C-F}} = 31.7$  Hz), 136.7, 144.2, 166.5. HRMS (DART)  $m/z = 230.0251$  calcd for  $\text{C}_{10}\text{H}_7\text{F}_3\text{NS}$   $[\text{M}+\text{H}]^+$ , found: 230.0252.

**Methyl 4-(thiazol-2-yl)benzoate (3n)**

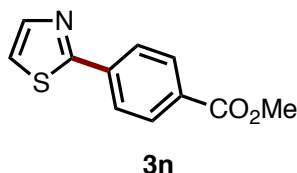

Purification by PTLC (hexane/EtOAc = 5:1) and GPC gave **3n** as a light yellow solid (Method A: 82% yield).

[11] Lapointe, D.; Fagnou, K. *Org. Lett.* **2009**, *11*, 4160.





**Supporting Information (Tani, Uehara, Yamaguchi, Itami)**  
**Programmed Synthesis of Arylthiazoles through Sequential C–H Couplings**

$^1\text{H}$  NMR (600 MHz,  $\text{CDCl}_3$ )  $\delta$  3.95 (s, 3H), 7.41 (d,  $J = 3.4$  Hz, 1H), 7.93 (d,  $J = 3.4$  Hz, 1H), 8.05 (d,  $J = 8.2$  Hz, 2H), 8.12 (d,  $J = 8.2$  Hz, 2H).  $^{13}\text{C}$  NMR (150 MHz,  $\text{CDCl}_3$ )  $\delta$  52.2, 119.9, 126.4, 130.2, 131.2, 137.4, 144.1, 166.4, 166.9. HRMS (DART)  $m/z = 220.0432$  calcd for  $\text{C}_{11}\text{H}_{10}\text{NO}_2\text{S}$   $[\text{M}+\text{H}]^+$ , found: 220.0430.

**2-(4-Acetylphenyl)thiazole (3o)<sup>[12]</sup>**

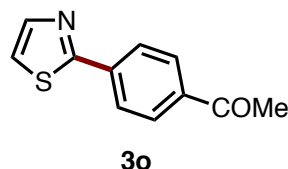

Purification by PTLC (hexane/EtOAc = 3:1) and GPC gave **3o** as a white solid (Method A: 75% yield).  $^1\text{H}$  NMR (600 MHz,  $\text{CDCl}_3$ )  $\delta$  2.64 (s, 3H), 7.42 (d,  $J = 2.8$  Hz, 1H), 7.93 (d,  $J = 2.8$  Hz, 1H), 8.03 (d,  $J = 8.2$  Hz, 2H), 8.07 (d,  $J = 8.2$  Hz, 2H).  $^{13}\text{C}$  NMR (150 MHz,  $\text{CDCl}_3$ )  $\delta$  26.7, 120.0, 126.6, 129.0, 137.5, 137.9, 144.2, 166.9, 197.3. HRMS (DART)  $m/z = 204.0483$  calcd for  $\text{C}_{11}\text{H}_{10}\text{NOS}$   $[\text{M}+\text{H}]^+$ , found: 204.0484.

**2-(4-(Methylsulfonyl)phenyl)thiazole (3p)**

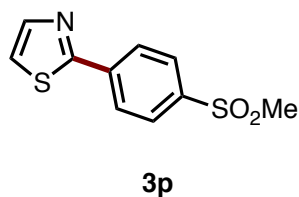

Purification by PTLC (hexane/EtOAc = 2:1) gave **3p** as a white solid (Method C: 41% yield).  $^1\text{H}$  NMR (600 MHz,  $\text{CDCl}_3$ )  $\delta$  3.10 (s, 3H), 7.47 (d,  $J = 3.1$  Hz, 1H), 7.95 (d,  $J = 3.1$  Hz, 1H), 8.02 (d,  $J = 8.6$  Hz, 2H), 8.16 (d,  $J = 8.6$  Hz, 2H);  $^{13}\text{C}$  NMR (150 MHz,  $\text{CDCl}_3$ )  $\delta$  44.4, 120.6, 127.2, 128.1, 138.2, 141.2, 144.4, 165.7; HRMS (DART)  $m/z = 240.0153$  calcd for  $\text{C}_{10}\text{H}_{10}\text{NO}_2\text{S}_2$   $[\text{M}+\text{H}]^+$ , found: 240.0153.

**2-(4-Nitrophenyl)thiazole (3q)**

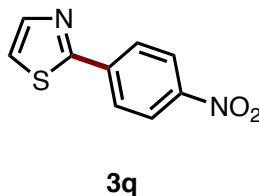

Purification by PTLC (hexane/EtOAc = 2:1) and GPC gave **3q** as a yellow solid (Method A: 78% yield).  $^1\text{H}$  NMR (600 MHz,  $\text{CDCl}_3$ )  $\delta$  7.50 (d,  $J = 3.5$  Hz, 1H), 7.97 (d,  $J = 3.5$  Hz, 1H), 8.13 (d,  $J = 8.2$  Hz, 2H), 8.29 (d,  $J = 8.2$  Hz, 2H);  $^{13}\text{C}$  NMR (150 MHz,  $\text{CDCl}_3$ )  $\delta$  121.0, 124.3, 127.1, 138.9, 144.6, 148.3, 165.2; HRMS (DART)  $m/z = 207.0228$  calcd for  $\text{C}_9\text{H}_7\text{N}_2\text{O}_2\text{S}$   $[\text{M}+\text{H}]^+$ , found: 207.0228.

[12] Jensen, J.; Skjærbæk, N.; Vedsø, P. *Synthesis* **2001**, 128.



**Supporting Information (Tani, Uehara, Yamaguchi, Itami)**  
**Programmed Synthesis of Arylthiazoles through Sequential C–H Couplings**

**2-(5-Methylthiophen-2-yl)thiazole (3r)<sup>[13]</sup>**

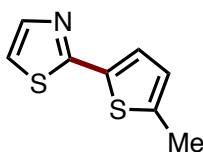

**3r**

Purification by GPC and PTLC (hexane/EtOAc = 10:1) gave **3r** as a colorless oil (Method C: 50% yield). <sup>1</sup>H NMR (600 MHz, CDCl<sub>3</sub>) δ 2.51 (s, 3H), 6.73 (d, *J* = 4.1 Hz, 1H), 7.19 (d, *J* = 3.5 Hz, 1H), 7.31 (d, *J* = 4.1 Hz, 1H), 7.72 (d, *J* = 3.5 Hz, 1H); <sup>13</sup>C NMR (150 MHz, CDCl<sub>3</sub>) δ 15.5, 117.4, 126.1, 126.6, 134.9, 142.7, 143.0, 162.2; HRMS (DART) *m/z* = 182.0098 calcd for C<sub>8</sub>H<sub>8</sub>NS<sub>2</sub> [M+H]<sup>+</sup>, found: 182.0099.

**2-(3-Pyridyl)thiazole (3t)<sup>[14]</sup>**

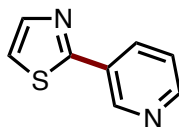

**3t**

Purification by PTLC (hexane/EtOAc = 1:1) gave **3t** as a yellow solid (Method B: 49% yield). <sup>1</sup>H NMR (600 MHz, CDCl<sub>3</sub>) δ 7.39 (dd, *J* = 8.2, 4.8 Hz, 1H), 7.42 (d, *J* = 3.4 Hz, 1H), 7.93 (d, *J* = 3.4 Hz, 1H), 8.26 (dt, *J* = 8.2 Hz, 2.0 Hz, 1H), 8.66 (dd, *J* = 4.8, 1.4 Hz, 1H), 9.19 (d, *J* = 2.0 Hz, 1H); <sup>13</sup>C NMR (150 MHz, CDCl<sub>3</sub>) δ 119.6, 123.7, 129.5, 133.6, 144.1, 147.7, 150.7, 164.8; HRMS (DART) *m/z* = 163.0330 calcd for C<sub>8</sub>H<sub>7</sub>N<sub>2</sub>S [M+H]<sup>+</sup>, found: 163.0328.

[13] Kaniskan, N.; Elmali, D.; Civeir, P. U. *ARKIVOC* **2008**, 12, 17.

[14] Denton, T. T.; Zhang, X.; Cashman, J. R. *J. Med. Chem.* **2005**, 48, 224.



**Supporting Information (Tani, Uehara, Yamaguchi, Itami)**  
**Programmed Synthesis of Arylthiazoles through Sequential C–H Couplings**

**4. Synthesis of 5-Arylthiazoles**

**Screening of Reaction Conditions**

**Table S2. Screening of Reaction Conditions**

| Entry              | X  | Y    | [Pd]                     | Ligand                                            | Solvent          | Base                            | Temp.  | Time | 3a <sup>[b]</sup> | 4a <sup>[b]</sup> | 9aa <sup>[b]</sup> |
|--------------------|----|------|--------------------------|---------------------------------------------------|------------------|---------------------------------|--------|------|-------------------|-------------------|--------------------|
| 1                  | I  | 1.25 | PdCl <sub>2</sub> (bipy) | none                                              | DMF              | Cs <sub>2</sub> CO <sub>3</sub> | 120 °C | 12 h | 4%                | 14%               | 5%                 |
| 2                  | I  | 1.25 | PdCl <sub>2</sub> (bipy) | none                                              | DMF              | Cs <sub>2</sub> CO <sub>3</sub> | 120 °C | 12 h | 9%                | 21%               | 32%                |
| 3                  | I  | 1.25 | Pd(OAc) <sub>2</sub>     | dppp <sup>[a]</sup>                               | DMF              | Cs <sub>2</sub> CO <sub>3</sub> | 120 °C | 12 h | 2%                | 44%               | 3%                 |
| 4                  | I  | 1.25 | Pd(OAc) <sub>2</sub>     | PCy <sub>3</sub> ·HBF <sub>4</sub>                | DMF              | Cs <sub>2</sub> CO <sub>3</sub> | 120 °C | 12 h | 1%                | 36%               | 8%                 |
| 5                  | I  | 1.25 | Pd(OAc) <sub>2</sub>     | PMe( <i>t</i> -Bu) <sub>2</sub> ·HBF <sub>4</sub> | DMF              | Cs <sub>2</sub> CO <sub>3</sub> | 120 °C | 12 h | 0%                | 48%               | 7%                 |
| 6 <sup>[c]</sup>   | Br | 1.25 | Pd(OAc) <sub>2</sub>     | PMe( <i>t</i> -Bu) <sub>2</sub> ·HBF <sub>4</sub> | DMF              | Cs <sub>2</sub> CO <sub>3</sub> | 100 °C | 12 h | 2%                | 74%               | 19%                |
| 7 <sup>[c]</sup>   | Br | 1.25 | Pd(OAc) <sub>2</sub>     | PMe( <i>t</i> -Bu) <sub>2</sub> ·HBF <sub>4</sub> | <i>t</i> -BuOH   | Cs <sub>2</sub> CO <sub>3</sub> | 100 °C | 12 h | 0%                | 67%               | 12%                |
| 8 <sup>[c,d]</sup> | Br | 1.5  | Pd(OAc) <sub>2</sub>     | PMe( <i>t</i> -Bu) <sub>2</sub> ·HBF <sub>4</sub> | DMF              | K <sub>2</sub> CO <sub>3</sub>  | 120 °C | 12 h | 2%                | 60%               | 11%                |
| 9 <sup>[c,d]</sup> | I  | 1.5  | Pd(OAc) <sub>2</sub>     | PMe( <i>t</i> -Bu) <sub>2</sub> ·HBF <sub>4</sub> | <i>t</i> -AmylOH | Cs <sub>2</sub> CO <sub>3</sub> | 80 °C  | 36 h | 0%                | 82%(80%)          | 8%                 |

<sup>[a]</sup> 10 mol% Ligand was used. <sup>[b]</sup> GC yield. Isolated yield is given in parenthesis. <sup>[c]</sup> 5 mol% Pd(OAc)<sub>2</sub> and 10 mol% PMe(*t*-Bu)<sub>2</sub>·HBF<sub>4</sub> were used. <sup>[d]</sup> 1.5 equiv of base was used.

**Method D<sup>[15]</sup>**

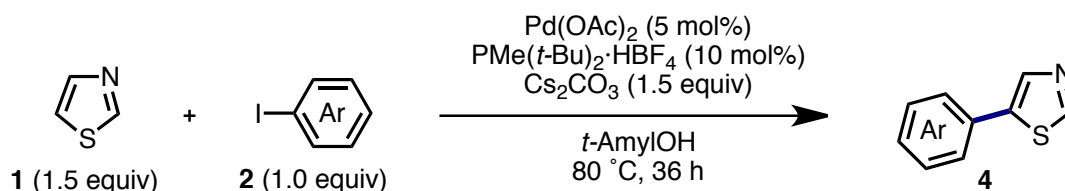

A 25-mL test tube equipped with screw cap containing a magnetic stirring bar, was flame-dried under vacuum and then cooling to room temperature. To this vessel were added Pd(OAc)<sub>2</sub> (4.5 mg, 0.02 mmol, 5 mol%), PMe(*t*-Bu)<sub>2</sub>·HBF<sub>4</sub> (10.0 mg, 0.04 mmol, 10 mol%), Cs<sub>2</sub>CO<sub>3</sub> (195.5 mg, 0.6 mmol, 1.5 equiv), iodoarene **2** (0.4 mmol, 1.0 equiv), thiazole (**1**: 0.6 mmol, 51.1 mg, 1.5 equiv), and *t*-AmylOH (1.0 mL) under argon atmosphere. The vessel was sealed and then stirred at 80 °C for 36 h. After cooling the reaction mixture to room temperature, the mixture was passed through a short silica gel pad (EtOAc). The filtrate was evaporated and the residue was purified by PTLC and/or GPC to afford 5-arylthiazole **4**. For further purification was passed through NH-silica gel pad (EtOAc) to afford desired product **4**.

**Method E<sup>[16]</sup>**

[15] Liégault, B.; Lapointe, D.; Caron, L.; Vlassova, A.; Fagnou, K. *J. Org. Chem.* **2009**, *74*, 1826.

[16] Roger, J.; Požgan, F. Doucet, H. *J. Org. Chem.* **2009**, *74*, 1179.

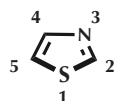

**Supporting Information (Tani, Uehara, Yamaguchi, Itami)**  
**Programmed Synthesis of Arylthiazoles through Sequential C–H Couplings**

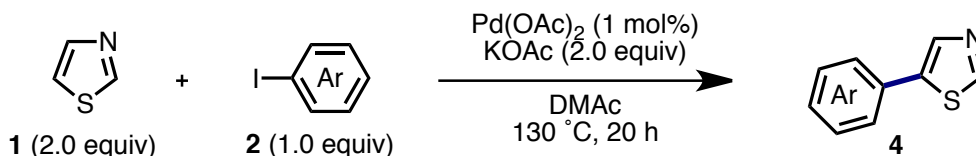

A 7-mL test tube equipped with screw cap containing a magnetic stirring bar, was flame-dried under vacuum and then cooling to room temperature. To this vessel were added  $\text{Pd}(\text{OAc})_2$  (0.9 mg, 0.004 mmol, 1 mol%), KOAc (79.4 mg, 0.8 mmol, 2.0 equiv), bromoarene **2** (0.4 mmol, 1.0 equiv), thiazole (**1**: 0.8 mmol, 68.1 mg, 2.0 equiv), and DMAc (1 mL). The vessel was sealed and then stirred at 130 °C for 20 h. After cooling the reaction mixture to room temperature, the mixture was passed through a short silica gel pad (EtOAc). The filtrate was evaporated and the residue was purified by PTLC to afford desired product **4**.

**5-Phenylthiazole (4a)<sup>[17]</sup>**

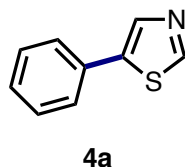

Purification by PTLC (hexane/EtOAc = 10:1) gave **4a** as a white solid (Method D: 80% yield).  $^1\text{H}$  NMR (600 MHz,  $\text{CDCl}_3$ )  $\delta$  7.35 (t,  $J$  = 7.6 Hz, 1H), 7.41 (t,  $J$  = 7.6 Hz, 2H), 7.58 (d,  $J$  = 7.6 Hz, 2H), 8.08 (s, 1H), 8.75 (s, 1H);  $^{13}\text{C}$  NMR (150 MHz,  $\text{CDCl}_3$ )  $\delta$  127.0, 128.4, 129.1, 131.1, 139.0, 139.4, 152.0; HRMS (DART)  $m/z$  = 162.0377 calcd for  $\text{C}_9\text{H}_8\text{NS}$   $[\text{M}+\text{H}]^+$ , found: 162.0378.

**5-(4-Methylphenyl)thiazole (4b)<sup>[12]</sup>**

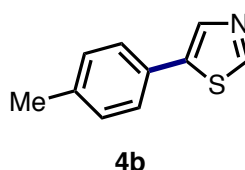

Purification by PTLC (hexane/EtOAc = 10:1) gave **4b** as a white solid (Method D: 78% yield).  $^1\text{H}$  NMR (600 MHz,  $\text{CDCl}_3$ )  $\delta$  2.36 (s, 3H), 7.20 (d,  $J$  = 7.6 Hz, 2H), 7.45 (d,  $J$  = 7.6 Hz, 2H), 8.03 (s, 1H), 8.70 (s, 1H);  $^{13}\text{C}$  NMR (150 MHz,  $\text{CDCl}_3$ )  $\delta$  21.1, 126.8, 128.2, 129.7, 138.4, 138.5, 139.4, 151.5; HRMS (DART)  $m/z$  = 176.0534 calcd for  $\text{C}_{10}\text{H}_{10}\text{NS}$   $[\text{M}+\text{H}]^+$ , found: 176.0535.

**5-(4-(tert-Butyl)phenyl)thiazole (4c)**

[17] Pavlik, J. W.; Tongcharoensirikul, P.; Bird, N. P.; Day, A. C.; Barltrop, J. A. *J. Am. Chem. Soc.* **1994**, *116*, 2292.



**Supporting Information (Tani, Uehara, Yamaguchi, Itami)**  
**Programmed Synthesis of Arylthiazoles through Sequential C–H Couplings**

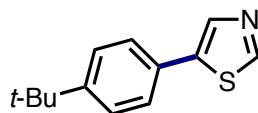

**4c**

Purification by PTLC (hexane/EtOAc = 5:1) gave **4c** as a yellow solid (Method D: 71% yield).  $^1\text{H}$  NMR (600 MHz,  $\text{CDCl}_3$ )  $\delta$  1.33 (s, 9H), 7.42 (d,  $J$  = 8.6 Hz, 2H), 7.50 (d,  $J$  = 8.6 Hz, 2H), 8.04 (s, 1H), 8.70 (s, 1H);  $^{13}\text{C}$  NMR (150 MHz,  $\text{CDCl}_3$ )  $\delta$  31.1, 34.6, 126.0, 126.7, 128.2, 138.6, 139.3, 151.57, 151.63; HRMS (DART)  $m/z$  = 218.1003 calcd for  $\text{C}_{13}\text{H}_{17}\text{NS}$   $[\text{M}+\text{H}]^+$ , found: 218.1008.

**5-(3,5-Dimethylphenyl)thiazole (4e)**

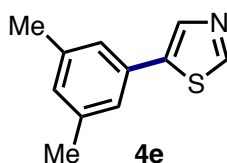

**4e**

Purification by PTLC (hexane/EtOAc = 10:1) gave **4e** as a yellow oil (Method D: 57% yield).  $^1\text{H}$  NMR (600 MHz,  $\text{CDCl}_3$ )  $\delta$  2.35 (s, 6H), 6.98 (s, 1H), 7.19 (s, 2H), 8.05 (s, 1H), 8.71 (s, 1H);  $^{13}\text{C}$  NMR (150 MHz,  $\text{CDCl}_3$ )  $\delta$  21.2, 124.8, 130.1, 130.8, 138.7, 138.8, 139.6, 151.7; HRMS (DART)  $m/z$  = 190.0690 calcd for  $\text{C}_{11}\text{H}_{12}\text{NS}$   $[\text{M}+\text{H}]^+$ , found: 190.0691.

**5-(2-Methylphenyl)thiazole (4f)<sup>[9]</sup>**

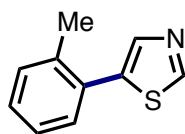

**4f**

Purification by PTLC (hexane/EtOAc = 10:1) gave **4f** as a light yellow oil (Method D: 76% yield).  $^1\text{H}$  NMR (600 MHz,  $\text{CDCl}_3$ )  $\delta$  2.38 (s, 3H), 7.21–7.31 (m, 3H), 7.36 (d,  $J$  = 7.6 Hz, 1H), 7.84 (s, 1H), 8.81 (s, 1H);  $^{13}\text{C}$  NMR (150 MHz,  $\text{CDCl}_3$ )  $\delta$  20.9, 126.0, 128.6, 130.2, 130.67, 130.73, 136.4, 137.3, 141.6, 152.6; HRMS (DART)  $m/z$  = 176.0534 calcd for  $\text{C}_{10}\text{H}_{10}\text{NS}$   $[\text{M}+\text{H}]^+$ , found: 176.0534.

**5-(4-Methoxyphenyl)thiazole (4g)<sup>[15]</sup>**

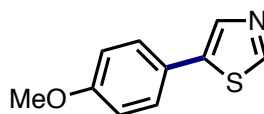

**4g**

Purification by PTLC (hexane/EtOAc = 5:1) gave **4g** as a white solid (Method D: 81% yield).  $^1\text{H}$  NMR



**Supporting Information (Tani, Uehara, Yamaguchi, Itami)**  
**Programmed Synthesis of Arylthiazoles through Sequential C–H Couplings**

(600 MHz, CDCl<sub>3</sub>)  $\delta$  3.83 (s, 3H), 6.93 (dt,  $J$  = 8.9, 2.1 Hz, 2H), 7.50 (d,  $J$  = 8.9, 2.1 Hz, 2H), 7.97 (s, 1H), 8.69 (s, 1H); <sup>13</sup>C NMR (150 MHz, CDCl<sub>3</sub>)  $\delta$  55.3, 114.5, 123.6, 128.2, 138.0, 139.2, 151.2, 159.8; HRMS (DART)  $m/z$  = 192.0483 calcd for C<sub>10</sub>H<sub>10</sub>NOS [M+H]<sup>+</sup>, found: 192.0483.

**5-(Benzo[d][1,3]dioxol-5-yl)thiazole (4h)**

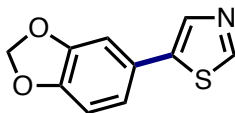

**4h**

Purification by PTLC (hexane/EtOAc = 3:1) and GPC gave **4h** as a white solid (Method D: 77% yield). <sup>1</sup>H NMR (600 MHz, CDCl<sub>3</sub>)  $\delta$  6.00 (s, 2H), 6.83 (d,  $J$  = 7.6 Hz, 1H), 7.03–7.07 (m, 2H), 7.95 (s, 1H), 8.69 (s, 1H); <sup>13</sup>C NMR (150 MHz, CDCl<sub>3</sub>)  $\delta$  101.4, 107.3, 108.8, 120.9, 125.0, 138.3, 139.2, 147.8, 148.2, 151.3; HRMS (DART)  $m/z$  = 206.0276 calcd for C<sub>10</sub>H<sub>8</sub>NO<sub>2</sub>S [M+H]<sup>+</sup>, found: 206.0276.

**2-(3,4,5-Trimethoxyphenyl)thiazole (4i)**

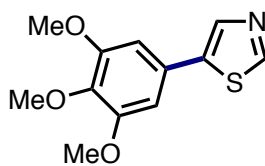

**4i**

5-Bromo-1,2,3-trimethoxybenzene was used and the reaction was performed at 100 °C for 18 h. Purification by GPC gave **4i** as a light yellow solid (Method D: 58% yield). <sup>1</sup>H NMR (600 MHz, CDCl<sub>3</sub>)  $\delta$  3.88 (s, 3H), 3.92 (s, 6H), 6.77 (s, 2H), 8.01 (s, 1H), 8.74 (s, 1H); <sup>13</sup>C NMR (150 MHz, CDCl<sub>3</sub>)  $\delta$  56.1, 60.8, 104.4, 126.5, 138.4, 138.7, 139.3, 151.7, 153.5; HRMS (DART)  $m/z$  = 252.0694 calcd for C<sub>12</sub>H<sub>14</sub>NO<sub>3</sub>S [M+H]<sup>+</sup>, found: 252.0695.

**5-(4-Chlorophenyl)thiazole (4j)**

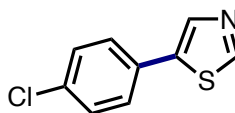

**4j**

Purification by GPC gave **4j** as a yellow solid (Method D: 63% yield). <sup>1</sup>H NMR (600 MHz, CDCl<sub>3</sub>)  $\delta$  7.37 (d,  $J$  = 8.3 Hz, 2H), 7.49 (d,  $J$  = 8.3 Hz, 2H), 8.05 (s, 1H), 8.76 (s, 1H); <sup>13</sup>C NMR (150 MHz, CDCl<sub>3</sub>)  $\delta$  128.1, 129.3, 129.6, 134.3, 138.1, 139.3, 152.3; HRMS (DART)  $m/z$  = 195.9988 calcd for C<sub>9</sub>H<sub>7</sub>ClNS [M+H]<sup>+</sup>, found: 195.9988.



**Supporting Information (Tani, Uehara, Yamaguchi, Itami)**  
**Programmed Synthesis of Arylthiazoles through Sequential C–H Couplings**

**5-(4-Trifluoromethylphenyl)thiazole (4k)<sup>[18]</sup>**

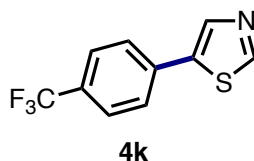

Purification by PTLC (hexane/EtOAc = 10:1) and GPC gave **4k** as a light yellow solid (Method D: 75% yield). <sup>1</sup>H NMR (600 MHz, CDCl<sub>3</sub>) δ 7.65–7.70 (m, 4H), 8.16 (s, 1H), 8.82 (s, 1H); <sup>13</sup>C NMR (150 MHz, CDCl<sub>3</sub>) δ 123.9 (q, *J*<sub>C-F</sub> = 271.7 Hz), 126.1 (q, *J*<sub>C-F</sub> = 4.3 Hz), 127.1, 130.3 (q, *J*<sub>C-F</sub> = 31.6 Hz), 134.6, 137.7, 140.2, 153.1; HRMS (DART) *m/z* = 230.0251 calcd for C<sub>10</sub>H<sub>7</sub>F<sub>3</sub>NS [M+H]<sup>+</sup>, found: 230.0250.

**5-(4-Trifluoromethoxyphenyl)thiazole (4m)**

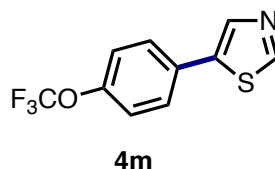

Purification by PTLC (hexane/EtOAc = 5:1) gave **4m** as a colorless oil (Method D: 72% yield). <sup>1</sup>H NMR (600 MHz, CDCl<sub>3</sub>) δ 7.27 (d, *J* = 8.6 Hz, 2H), 7.60 (dt, *J* = 8.6, 2H), 8.06 (s, 1H), 8.78 (s, 1H); <sup>13</sup>C NMR (150 MHz, CDCl<sub>3</sub>) δ 120.4 (q, *J*<sub>C-F</sub> = 257.3 Hz), 121.6, 128.4, 129.9, 137.8, 139.5, 149.1, 152.5; HRMS (DART) *m/z* = 246.0200 calcd for C<sub>10</sub>H<sub>7</sub>F<sub>3</sub>NOS [M+H]<sup>+</sup>, found: 246.0201.

**Methyl 4-(thiazol-5-yl)benzoate (4n)**

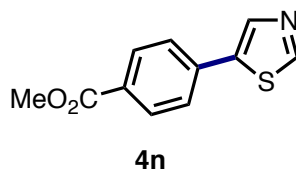

Purification by PTLC (hexane/EtOAc = 3:1) and GPC gave **4n** as a white solid (Method D: 61% yield). <sup>1</sup>H NMR (600 MHz, CDCl<sub>3</sub>) δ 3.94 (s, 3H), 7.64 (d, *J* = 8.3 Hz, 2H), 8.07 (d, *J* = 8.3 Hz, 2H), 8.17 (s, 1H), 8.82 (s, 1H); <sup>13</sup>C NMR (150 MHz, CDCl<sub>3</sub>) δ 52.2, 126.6, 129.8, 130.3, 135.4, 138.2, 140.1, 153.0, 166.3; HRMS (DART) *m/z* = 220.0432 calcd for C<sub>11</sub>H<sub>10</sub>NO<sub>2</sub>S [M+H]<sup>+</sup>, found: 220.0434.

**5-(4-Acetylphenyl)thiazole (4o)**

[18] Mamada, M.; Nishida, J.; Kumaki, D.; Tokito, S.; Yamashita, Y. *Chem. Mater.* **2007**, *19*, 5404.



**Supporting Information (Tani, Uehara, Yamaguchi, Itami)**  
**Programmed Synthesis of Arylthiazoles through Sequential C–H Couplings**

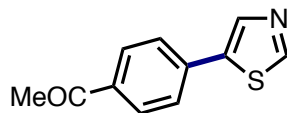

**4o**

Purification by PTLC (hexane/EtOAc = 3:1) gave **4o** as a white solid (Method E: 82% yield).  $^1\text{H}$  NMR (600 MHz,  $\text{CDCl}_3$ )  $\delta$  2.63 (s, 3H), 7.67 (d,  $J$  = 8.2 Hz, 2H), 8.00 (d,  $J$  = 8.2 Hz, 2H), 8.19 (s, 1H), 8.83 (s, 1H);  $^{13}\text{C}$  NMR (150 MHz,  $\text{CDCl}_3$ )  $\delta$  26.5, 126.8, 129.1, 135.5, 136.5, 138.1, 140.2, 153.1, 197.0; HRMS (DART)  $m/z$  = 204.0483 calcd for  $\text{C}_{11}\text{H}_{10}\text{NOS}$   $[\text{M}+\text{H}]^+$ , found: 204.0484.

**5-(4-(Methylsulfonyl)phenyl)thiazole (4p)**

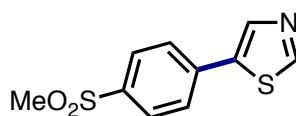

**4p**

Purification by PTLC (hexane/EtOAc = 2:1) gave **4p** as a yellow solid (Method E: 66% yield).  $^1\text{H}$  NMR (600 MHz,  $\text{CDCl}_3$ )  $\delta$  3.10 (s, 3H), 7.78 (d,  $J$  = 8.3 Hz, 2H), 8.00 (d,  $J$  = 8.3 Hz, 2H), 8.22 (s, 1H), 8.87 (s, 1H);  $^{13}\text{C}$  NMR (150 MHz,  $\text{CDCl}_3$ )  $\delta$  44.4, 127.5, 128.3, 136.4, 137.2, 139.9, 140.8, 153.7; HRMS (DART)  $m/z$  = 240.0153 calcd for  $\text{C}_{10}\text{H}_{10}\text{NO}_2\text{S}_2$   $[\text{M}+\text{H}]^+$ , found: 240.0512.

**5-(4-Nitrophenyl)thiazole (4q)**

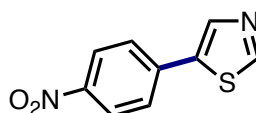

**4q**

Purification by PTLC (hexane/EtOAc = 2:1) gave **4q** as a yellow solid (Method D: 41% yield).  $^1\text{H}$  NMR (600 MHz,  $\text{CDCl}_3$ )  $\delta$  7.75 (d,  $J$  = 8.2 Hz, 2H), 8.24 (s, 1H), 8.29 (d,  $J$  = 8.2 Hz, 2H), 8.89 (s, 1H);  $^{13}\text{C}$  NMR (150 MHz,  $\text{CDCl}_3$ )  $\delta$  124.5, 127.3, 136.9, 137.4, 141.1, 147.3, 154.1; HRMS (DART)  $m/z$  = 207.0228 calcd for  $\text{C}_9\text{H}_7\text{NO}_2\text{S}$   $[\text{M}+\text{H}]^+$ , found: 207.0228.

**5-(5-Ethylthiophen-2-yl)thiazole (4s)**

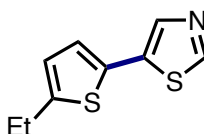

**4s**

Purification by PTLC (hexane/EtOAc = 10:1) and GPC gave **4s** as a yellow oil (Method D: 26% yield).  $^1\text{H}$





**Supporting Information (Tani, Uehara, Yamaguchi, Itami)**  
**Programmed Synthesis of Arylthiazoles through Sequential C–H Couplings**

NMR (600 MHz,  $\text{CDCl}_3$ )  $\delta$  1.33 (t,  $J = 7.6$  Hz, 3H), 2.85 (q,  $J = 7.6$  Hz, 2H), 6.73 (d,  $J = 3.4$  Hz, 1H), 7.02 (d,  $J = 3.4$  Hz, 1H), 7.89 (s, 1H), 8.65 (s, 1H);  $^{13}\text{C}$  NMR (150 MHz,  $\text{CDCl}_3$ )  $\delta$  15.8, 23.5, 124.2, 125.7, 130.1, 133.0, 138.6, 148.4, 150.9; HRMS (DART)  $m/z = 196.0255$  calcd for  $\text{C}_9\text{H}_{10}\text{NS}_2$   $[\text{M}+\text{H}]^+$ , found: 196.0256.

**5-(3-Pyridyl)thiazole (4t)<sup>[19]</sup>**

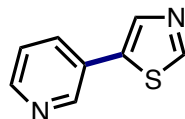

**4t**

Purification by PTLC (hexane/EtOAc = 3:1) gave **4t** as a light yellow oil (Method E: 65% yield).  $^1\text{H}$  NMR (600 MHz,  $\text{CDCl}_3$ )  $\delta$  7.36 (dd,  $J = 7.6, 4.8$  Hz, 1H), 7.87 (dt,  $J = 7.6, 2.1$  Hz, 1H), 8.14 (s, 1H), 8.59 (d,  $J = 4.8$  Hz, 1H), 8.85 (s, 1H), 8.86 (d,  $J = 2.1$  Hz, 1H);  $^{13}\text{C}$  NMR (150 MHz,  $\text{CDCl}_3$ )  $\delta$  123.7, 127.3, 134.0, 135.4, 139.9, 147.7, 149.4, 153.0; HRMS (DART)  $m/z = 163.0330$  calcd for  $\text{C}_7\text{H}_7\text{N}_2\text{S}$   $[\text{M}+\text{H}]^+$ , found: 163.0331.

**5-(4-Pyridyl)thiazole (4u)<sup>[19]</sup>**

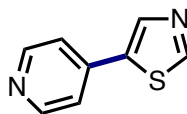

**4u**

Purification by PTLC (hexane/EtOAc = 3:1) gave **4u** as a colorless oil (Method E: 62% yield).  $^1\text{H}$  NMR (600 MHz,  $\text{CDCl}_3$ )  $\delta$  7.47 (d,  $J = 6.2$  Hz, 2H), 8.27 (s, 1H), 8.65 (d,  $J = 6.2$  Hz, 2H), 8.88 (s, 1H);  $^{13}\text{C}$  NMR (150 MHz,  $\text{CDCl}_3$ )  $\delta$  120.9, 136.5, 138.4, 141.0, 150.5, 153.8; HRMS (DART)  $m/z = 163.0330$  calcd for  $\text{C}_7\text{H}_7\text{N}_2\text{S}$   $[\text{M}+\text{H}]^+$ , found: 163.0332.

[19] Haginoya, N.; Kobayashi, S.; Komoriya, S.; Yoshino, T.; Nagata, T.; Hirokawa, Y.; Nagahara, T. *Bioorg. Med. Chem.* **2004**, *12*, 5579.



**Supporting Information (Tani, Uehara, Yamaguchi, Itami)**  
**Programmed Synthesis of Arylthiazoles through Sequential C–H Couplings**

**5. Synthesis of 4-Arylthiazoles**

**Method F<sup>[20]</sup>**

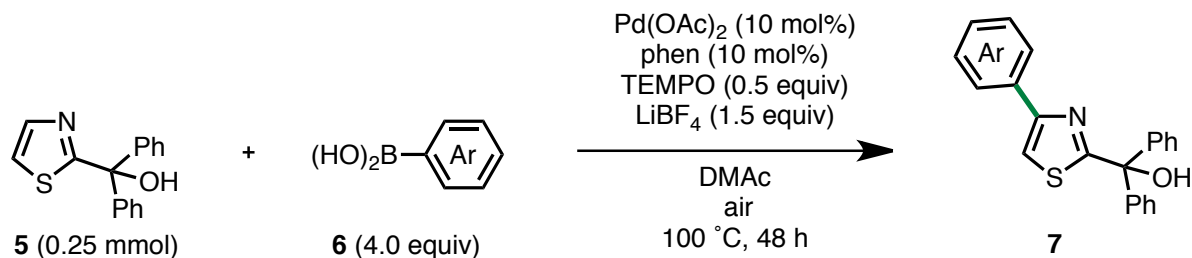

A 25-mL test tube equipped with screw cap, containing a magnetic stirring bar, was added Pd(OAc)<sub>2</sub> (5.6 mg, 0.025 mmol, 10 mol%), 1,10-phenanthroline (phen: 4.5 mg, 0.025 mmol, 10 mol%), arylboronic acid **6** (1.0 mmol, 4.0 equiv), LiBF<sub>4</sub> (35.5 mg, 0.38 mmol, 1.5 equiv), TEMPO (19.5 mg, 0.13 mmol, 0.5 equiv), diphenyl(thiazol-2-yl)methanol (**5**: 0.25 mmol, 1.0 equiv) and undried DMAc (0.5 mL). The vessel was sealed under air and then stirred at 100 °C for 48 h. After cooling the reaction mixture to room temperature, the mixture was passed through a short silica gel pad (EtOAc). The filtrate was evaporated and the residue was purified by PTLC and/or GPC and/or flash column chromatography to afford 4-aryl-diphenyl(thiazol-2-yl)methanol **8**.

**Diphenyl(4-phenylthiazol-2-yl)methanol (7a)**

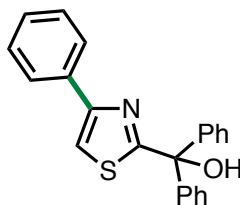

**7a**

Purification by PTLC (hexane/EtOAc = 10:1) gave **7a** as a colorless oil (Method F: 71% yield). <sup>1</sup>H NMR (600 MHz, CDCl<sub>3</sub>) δ 4.38 (s, 1H), 7.29–7.35 (m, 7H), 7.40 (t, *J* = 6.9 Hz, 2H), 7.45 (d, *J* = 6.9 Hz, 4H), 7.47 (s, 1H), 7.89 (d, *J* = 6.9 Hz, 2H); <sup>13</sup>C NMR (150 MHz, CDCl<sub>3</sub>) δ 80.7, 113.9, 126.4, 127.5, 127.9, 128.1, 128.2, 128.7, 134.2, 145.4, 155.1, 176.6; HRMS (DART) *m/z* = 344.1109 calcd for C<sub>22</sub>H<sub>18</sub>NOS [M+H]<sup>+</sup>, found: 344.1100.

**(4-(4-Methylphenyl)thiazol-2-yl)diphenylmethanol (7b)**

[20] Kirchberg, S.; Tani, S.; Ueda, K.; Yamaguchi, J.; Studer, A.; Itami, K. *Angew. Chem., Int. Ed.* **2011**, *50*, 2387.



**Supporting Information (Tani, Uehara, Yamaguchi, Itami)**  
**Programmed Synthesis of Arylthiazoles through Sequential C–H Couplings**

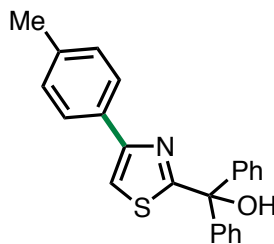

**7b**

Purification by flash column chromatography (hexane/EtOAc = 10:1) gave **7b** as a colorless oil (Method F: 75% yield).  $^1\text{H}$  NMR (600 MHz,  $\text{CDCl}_3$ )  $\delta$  2.35 (s, 3H), 4.48 (s, 1H), 7.18 (d,  $J$  = 8.3 Hz, 2H), 7.27–7.33 (m, 6H), 7.37 (s, 1H), 7.44 (d,  $J$  = 7.6 Hz, 2H), 7.77 (d,  $J$  = 8.3 Hz, 2H);  $^{13}\text{C}$  NMR (150 MHz,  $\text{CDCl}_3$ )  $\delta$  21.2, 80.6, 113.1, 126.3, 127.5, 127.9, 128.0, 129.4, 131.5, 138.1, 145.5, 155.2, 176.4; HRMS (DART)  $m/z$  = 358.1266 calcd for  $\text{C}_{23}\text{H}_{20}\text{NOS}$   $[\text{M}+\text{H}]^+$ , found: 358.1264.

**(4-(3-Methylphenyl)thiazol-2-yl)diphenylmethanol (7d)**

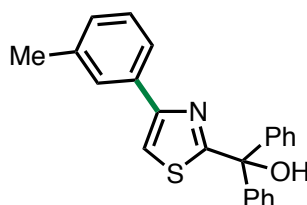

**7d**

Purification by flash column chromatography (hexane/EtOAc = 10:1) gave **7d** as a colorless oil (Method F: 77% yield).  $^1\text{H}$  NMR (600 MHz,  $\text{CDCl}_3$ )  $\delta$  2.38 (s, 3H), 4.47 (s, 1H), 7.13 (d,  $J$  = 7.6 Hz, 1H), 7.27–7.35 (m, 7H), 7.41–7.48 (m, 5H), 7.67 (d,  $J$  = 7.6 Hz, 1H), 7.72 (s, 1H);  $^{13}\text{C}$  NMR (150 MHz,  $\text{CDCl}_3$ )  $\delta$  21.4, 80.6, 113.8, 123.5, 127.1, 127.5, 127.9, 128.1, 128.6, 129.0, 134.1, 138.3, 145.4, 155.2, 176.5; HRMS (DART)  $m/z$  = 358.1266 calcd for  $\text{C}_{23}\text{H}_{20}\text{NOS}$   $[\text{M}+\text{H}]^+$ , found: 358.1267.

**(4-(3,5-Dimethylphenyl)thiazol-2-yl)diphenylmethanol (7e)**

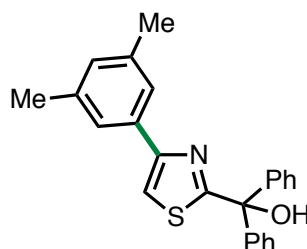

**7e**

Purification by flash column chromatography (hexane/EtOAc = 10:1) gave **7e** as a colorless oil (Method F: 62% yield).  $^1\text{H}$  NMR (600 MHz,  $\text{CDCl}_3$ )  $\delta$  2.34 (s, 6H), 4.51 (s, 1H), 6.96 (s, 1H), 7.28–7.35 (m, 6H), 7.42 (s, 1H), 7.43 (d,  $J$  = 6.9 Hz, 4H), 7.51 (s, 2H);  $^{13}\text{C}$  NMR (150 MHz,  $\text{CDCl}_3$ )  $\delta$  21.3, 80.6, 113.7, 124.3, 127.5,



**Supporting Information (Tani, Uehara, Yamaguchi, Itami)**  
**Programmed Synthesis of Arylthiazoles through Sequential C–H Couplings**

127.9, 128.1, 129.9, 134.0, 138.2, 145.5, 155.4, 176.3; HRMS (DART)  $m/z$  = 372.1422 calcd for  $C_{24}H_{22}NOS$   $[M+H]^+$ , found: 372.1421.

**(4-(4-Chlorophenyl)thiazol-2-yl)diphenylmethanol (7j)**

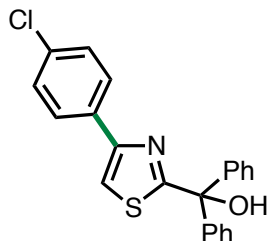

**7j**

Purification by flash column chromatography (hexane/EtOAc = 10:1) gave **7j** as a colorless oil (Method F: 66% yield).  $^1H$  NMR (600 MHz,  $CDCl_3$ )  $\delta$  4.25 (brs, 1H), 7.28–7.37 (m, 8H), 7.41–7.47 (m, 5H), 7.80 (d,  $J$  = 8.3 Hz, 2H);  $^{13}C$  NMR (150 MHz,  $CDCl_3$ )  $\delta$  80.0, 113.6, 126.8, 127.0, 127.3, 127.5, 128.2, 132.0, 133.3, 144.6, 153.4, 176.4; HRMS (DART)  $m/z$  = 378.0719 calcd for  $C_{22}H_{17}ClNOS$   $[M+H]^+$ , found: 378.0722.

**(4-(4-Fluorophenyl)thiazol-2-yl)diphenylmethanol (7l)**

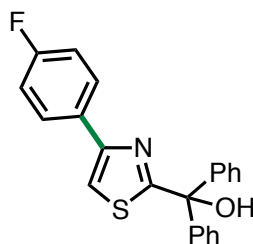

**7l**

Purification by flash column chromatography (hexane/EtOAc = 10:1) gave **7l** as a colorless oil (Method F: 56% yield).  $^1H$  NMR (600 MHz,  $CDCl_3$ )  $\delta$  4.36 (s, 1H), 7.06 (t,  $J$  = 8.3 Hz, 2H), 7.27–7.35 (m, 6H), 7.37 (s, 1H), 7.44 (dd,  $J$  = 8.3, 1.4 Hz, 4H), 7.82–7.86 (m, 2H);  $^{13}C$  NMR (150 MHz,  $CDCl_3$ )  $\delta$  80.6, 113.4, 115.6 (d,  $J_{C-F}$  = 21.6 Hz), 127.5, 127.9, 128.06, 128.09, 130.5 (d,  $J_{C-F}$  = 2.7 Hz), 145.3, 154.2, 162.7 (d,  $J_{C-F}$  = 247.2 Hz), 176.9; HRMS (DART)  $m/z$  = 362.1015 calcd for  $C_{22}H_{17}FNOS$   $[M+H]^+$ , found: 362.1017.

**(4-(4-Methoxycarbonylphenyl)thiazol-2-yl)diphenylmethanol (7n)**

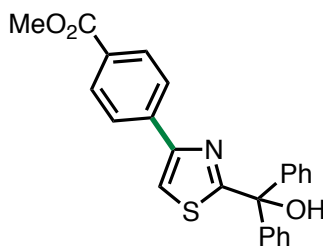

**7n**



**Supporting Information (Tani, Uehara, Yamaguchi, Itami)**  
**Programmed Synthesis of Arylthiazoles through Sequential C–H Couplings**

Purification by GPC gave **7n** as a white solid (Method F: 63% yield).  $^1\text{H}$  NMR (600 MHz,  $\text{CDCl}_3$ )  $\delta$  3.91 (s, 3H), 4.35 (s, 1H), 7.29–7.36 (m, 6H), 7.45 (dd,  $J$  = 8.2, 1.4 Hz, 4H), 7.58 (s, 1H), 7.95 (d,  $J$  = 8.3 Hz, 2H), 8.05 (d,  $J$  = 8.3 Hz, 2H);  $^{13}\text{C}$  NMR (150 MHz,  $\text{CDCl}_3$ )  $\delta$  52.1, 80.7, 115.8, 126.2, 127.5, 128.0, 128.1, 129.5, 130.1, 138.3, 145.2, 154.1, 166.8, 177.2; HRMS (DART)  $m/z$  = 402.1164 calcd for  $\text{C}_{24}\text{H}_{20}\text{NO}_3\text{S}$   $[\text{M}+\text{H}]^+$ , found: 402.1165.

**General Procedure for Deprotection of C4-Arylated Diphenyl-(2-thiazolyl)methanols **7**<sup>[2]</sup>**

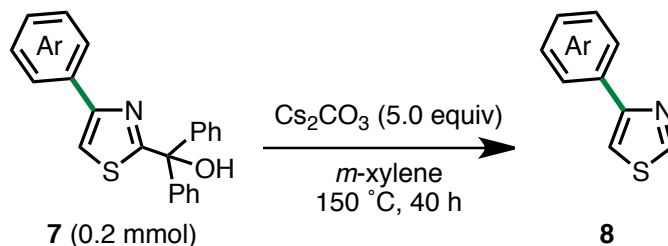

A 25-mL test tube equipped with screw cap containing a magnetic stirring bar, was flame-dried under vacuum and then cooling to room temperature. To this vessel was added **7** (ca. 0.1–0.2 mmol),  $\text{Cs}_2\text{CO}_3$  (325.9 mg, 1 mmol, 5–10 equiv), and *m*-xylene (0.8 mL). The vessel was sealed and then stirred at 150 °C for 40 h. After cooling the reaction mixture to room temperature, the mixture was passed through a short silica gel pad (EtOAc). The filtrate was evaporated and the residue was purified by PTLC or GPC to afford 4-arylthiazole **8**.

**4-Phenylthiazole (**8a**)<sup>[17]</sup>**

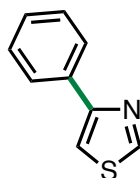

**8a**

Purification by PTLC (hexane/EtOAc = 10:1) gave **8a** as a white solid (95% yield).  $^1\text{H}$  NMR (600 MHz,  $\text{CDCl}_3$ )  $\delta$  7.35 (t,  $J$  = 8.2 Hz, 1H), 7.44 (t,  $J$  = 8.2 Hz, 2H), 7.54 (s, 2H), 7.94–8.00 (m, 2H), 8.88 (s, 1H).  $^{13}\text{C}$  NMR (150 MHz,  $\text{CDCl}_3$ )  $\delta$  112.5, 126.5, 128.2, 128.8, 134.2, 152.8, 156.4. HRMS (DART)  $m/z$  = 162.0378 calcd for  $\text{C}_9\text{H}_8\text{NS}$   $[\text{M}+\text{H}]^+$ , found: 162.0378.

**4-(4-Methylphenyl)thiazole (**8b**)<sup>[21]</sup>**

[21] Adam, W.; Hartung, J.; Okamoto, H.; Marquardt, S.; Nau, W. M.; Pischel, U.; Saha-Möller, C. R.; Špehar, K. J. *Org. Chem.* **2002**, 67, 6041.



**Supporting Information (Tani, Uehara, Yamaguchi, Itami)**  
**Programmed Synthesis of Arylthiazoles through Sequential C–H Couplings**

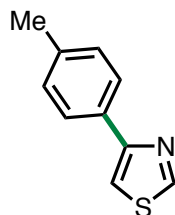

**8b**

Purification by PTLC (hexane/EtOAc = 10:1) gave **8b** as a white solid (78% yield).  $^1\text{H}$  NMR (600 MHz,  $\text{CDCl}_3$ )  $\delta$  2.38 (s, 3H), 7.24 (d,  $J = 8.3$  Hz, 2H), 7.46 (s, 1H), 7.82 (d,  $J = 8.3$  Hz, 2H), 8.85 (s, 1H);  $^{13}\text{C}$  NMR (150 MHz,  $\text{CDCl}_3$ )  $\delta$  21.2, 111.7, 126.3, 129.5, 131.5, 138.1, 152.6, 156.5; HRMS (DART)  $m/z = 176.0534$  calcd for  $\text{C}_{10}\text{H}_{10}\text{NS}$   $[\text{M}+\text{H}]^+$ , found: 176.0536.

**4-(3-Methylphenyl)thiazole (8d)**

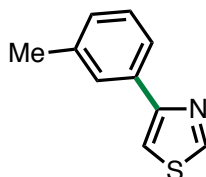

**8d**

Purification by PTLC (hexane/EtOAc = 10:1) gave **8d** as a yellow oil (84% yield).  $^1\text{H}$  NMR (600 MHz,  $\text{CDCl}_3$ )  $\delta$  2.42 (s, 3H), 7.17 (d,  $J = 7.6$  Hz, 1H), 7.32 (t,  $J = 7.6$  Hz, 1H), 7.51 (d,  $J = 2.1$  Hz, 1H), 7.71 (d,  $J = 7.6$  Hz, 1H), 7.78 (s, 1H), 8.87 (d,  $J = 2.1$  Hz, 1H);  $^{13}\text{C}$  NMR (150 MHz,  $\text{CDCl}_3$ )  $\delta$  21.4, 112.4, 123.5, 127.2, 128.7, 129.0, 134.1, 138.5, 152.7, 156.5; HRMS (DART)  $m/z = 176.0534$  calcd for  $\text{C}_{10}\text{H}_{10}\text{NS}$   $[\text{M}+\text{H}]^+$ , found: 176.0534.

**4-(3,5-Dimethylphenyl)thiazole (8e)**

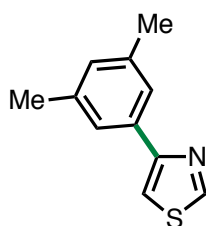

**8e**

Purification by GPC gave **8e** as a colorless oil (66% yield).  $^1\text{H}$  NMR (600 MHz,  $\text{CDCl}_3$ )  $\delta$  2.37 (s, 6H), 7.00 (s, 1H), 7.49 (d,  $J = 2.0$  Hz, 1H), 7.55 (s, 2H), 8.86 (d,  $J = 2.0$  Hz, 1H);  $^{13}\text{C}$  NMR (150 MHz,  $\text{CDCl}_3$ )  $\delta$  21.3, 112.2, 124.3, 129.9, 134.0, 138.3, 152.6, 156.7; HRMS (DART)  $m/z = 190.0690$  calcd for  $\text{C}_{11}\text{H}_{12}\text{NS}$   $[\text{M}+\text{H}]^+$ , found: 190.0691.



**Supporting Information (Tani, Uehara, Yamaguchi, Itami)**  
**Programmed Synthesis of Arylthiazoles through Sequential C–H Couplings**

**4-(4-Methoxyphenyl)thiazole (8g)** <sup>[22]</sup>

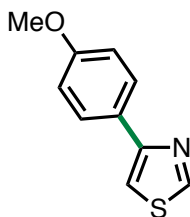

**8g**

C–H arylation of **5** with 4-methoxyphenylboronic acid following by Method F produced an inseparable mixture of **7g** and **5**. Yield of **7g** was determined by <sup>1</sup>H NMR (53% yield). Then the mixture was used without further purification. The deprotection reaction of **7g** produced **8g**. Purification by PTLC (hexane/EtOAc = 5:1) gave **8g** as a white solid (74% yield). <sup>1</sup>H NMR (600 MHz, CDCl<sub>3</sub>) δ 3.85 (s, 3H), 6.96 (d, *J* = 8.9 Hz, 2H), 7.39 (d, *J* = 1.4 Hz, 1H), 7.86 (d, *J* = 8.9 Hz, 2H), 8.84 (d, *J* = 1.4 Hz, 1H); <sup>13</sup>C NMR (150 MHz, CDCl<sub>3</sub>) δ 55.3, 110.7, 114.2, 127.2, 127.7, 152.6, 156.2, 159.7. HRMS (DART) *m/z* = 192.0483 calcd for C<sub>10</sub>H<sub>10</sub>NOS [M+H]<sup>+</sup>, found: 192.0484.

**4-(4-Chlorophenyl)thiazole (8j)** <sup>[22]</sup>

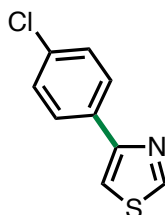

**8j**

Purification by PTLC (hexane/EtOAc = 10:1) gave **8j** as a white solid (87% yield). <sup>1</sup>H NMR (600 MHz, CDCl<sub>3</sub>) δ 7.39 (d, *J* = 8.2 Hz, 2H), 7.49 (d, *J* = 1.4 Hz, 1H), 7.85 (d, *J* = 8.2 Hz, 2H), 8.85 (d, *J* = 1.4 Hz, 1H); <sup>13</sup>C NMR (150 MHz, CDCl<sub>3</sub>) δ 112.8, 127.7, 128.9, 132.7, 134.0, 152.9, 155.2; HRMS (DART) *m/z* = 195.9988 calcd for C<sub>9</sub>H<sub>7</sub>ClNS [M+H]<sup>+</sup>, found: 195.9989.

**4-(4-Fluorophenyl)thiazole (8l)** <sup>[22]</sup>

[22] Fujii, H.; Nishimura, Y.; Nitta, A.; Sakami, S.; Nakaki, J.; Kozono, H. WO2007063928



**Supporting Information (Tani, Uehara, Yamaguchi, Itami)**  
**Programmed Synthesis of Arylthiazoles through Sequential C–H Couplings**

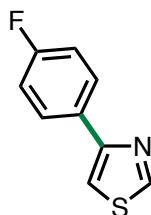

**8l**

Purification by PTLC (hexane/EtOAc = 10:1) gave **8l** as a white solid (80% yield).  $^1\text{H}$  NMR (600 MHz,  $\text{CDCl}_3$ )  $\delta$  7.12 (t,  $J$  = 8.9 Hz, 2H), 7.47 (d,  $J$  = 2.0 Hz, 1H), 7.91 (dd,  $J$  = 8.9, 5.5 Hz, 2H), 8.87 (d,  $J$  = 2.0 Hz, 1H);  $^{13}\text{C}$  NMR (150 MHz,  $\text{CDCl}_3$ )  $\delta$  112.1, 115.7 (d,  $J_{\text{C-F}}$  = 21.6 Hz), 128.15, 128.21, 130.5 (d,  $J_{\text{C-F}}$  = 2.9 Hz), 152.9, 155.4, 162.8 (d,  $J_{\text{C-F}}$  = 245.8 Hz); HRMS (DART)  $m/z$  = 180.0283 calcd for  $\text{C}_9\text{H}_7\text{FNS}$   $[\text{M}+\text{H}]^+$ , found: 180.0285.

**Methyl 4-(thiazol-4-yl)benzoate (8n)**

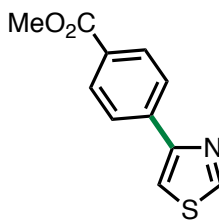

**8n**

Purification by PTLC (hexane/EtOAc = 5:1) gave **8n** as a white solid (88% yield).  $^1\text{H}$  NMR (600 MHz,  $\text{CDCl}_3$ )  $\delta$  3.94 (s, 3H), 7.67 (s, 1H), 8.01 (d,  $J$  = 8.3 Hz, 2H), 8.11 (d,  $J$  = 8.3 Hz, 2H), 8.90 (s, 1H);  $^{13}\text{C}$  NMR (150 MHz,  $\text{CDCl}_3$ )  $\delta$  52.1, 114.5, 126.3, 129.6, 130.2, 138.2, 153.2, 155.3, 166.8; HRMS (DART)  $m/z$  = 220.0432 calcd for  $\text{C}_{10}\text{H}_{10}\text{NO}_2\text{S}$   $[\text{M}+\text{H}]^+$ , found: 220.0432.





**Supporting Information (Tani, Uehara, Yamaguchi, Itami)**  
**Programmed Synthesis of Arylthiazoles through Sequential C–H Couplings**

## 6. Synthesis of 2,5-Diarylthiazoles

### Method G<sup>[23]</sup>

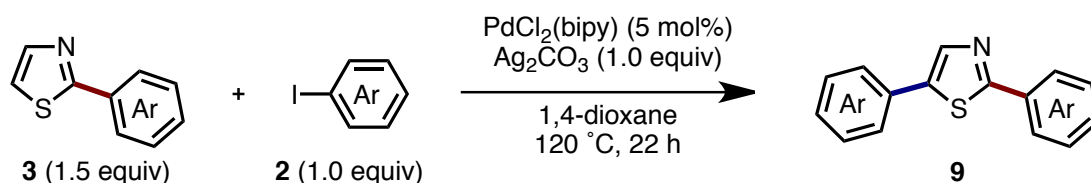

A 20-mL glass vessel equipped with J. Young<sup>®</sup> O-ring tap, containing a magnetic stirring bar, was flame-dried under vacuum and filled with argon after cooling to room temperature. To this vessel were added PdCl<sub>2</sub>(bipy) (4.2 mg, 0.013 mmol, 5 mol%), Ag<sub>2</sub>CO<sub>3</sub> (68.9 mg, 0.25 mmol, 1.0 equiv), iodoarene **2** (0.25 mmol, 1.0 equiv), 2-arylthiazole **3** (0.375 mmol, 1.5 equiv) and 1,4-dioxane (1.0 mL) under a stream of argon. The vessel was sealed and then stirred at 120 °C for 22 h. After cooling the reaction mixture to room temperature, the mixture was passed through a short silica gel pad (EtOAc). The filtrate was evaporated and the residue was purified by GPC to afford 2,5-diarylthiazole **9**.

### Method H<sup>[24]</sup>

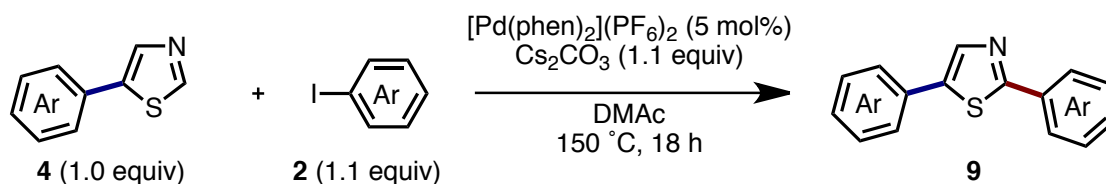

A 25-mL test tube equipped with screw cap, containing a magnetic stirring bar, was flame-dried under vacuum and then cooling to room temperature. To this vessel were added [Pd(phen)<sub>2</sub>](PF<sub>6</sub>)<sub>2</sub> (7.6 mg, 0.01 mmol, 5 mol%), Cs<sub>2</sub>CO<sub>3</sub> (71.7 mg, 0.22 mmol, 1.1 equiv), iodoarene **2** (0.22 mmol, 1.1 equiv) and 5-diarylthiazole **4** (0.2 mmol, 1.0 equiv) and DMAc (0.8 mL) under argon atmosphere. The vessel was sealed and then stirred at 150 °C for 18 h. After cooling the reaction mixture to room temperature, the mixture was passed through a short silica gel pad (EtOAc). The filtrate was evaporated and the residue was purified by PTLC and/or GPC to afford the desired product **9**.

[23] Yanagisawa, S.; Itami, K. *Tetrahedron* **2011**, 67, 4425.

[24] Shibahara, F.; Yamaguchi, E.; Murai, T. *J. Org. Chem.* **2011**, 76, 2680.



**Supporting Information (Tani, Uehara, Yamaguchi, Itami)**  
**Programmed Synthesis of Arylthiazoles through Sequential C–H Couplings**

**Method I<sup>[8]</sup>**

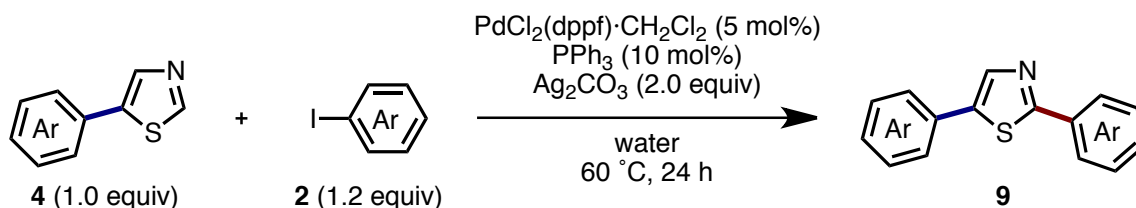

A 25-mL test tube equipped with screw cap, containing a magnetic stirring bar, were added  $\text{PdCl}_2(\text{dppf})\cdot\text{CH}_2\text{Cl}_2$  (8.2 mg, 0.01 mmol, 5 mol%),  $\text{PPh}_3$  (5.2 mg, 0.02 mmol, 10 mol%),  $\text{Ag}_2\text{CO}_3$  (110.3 mg, 0.4 mmol, 2.0 equiv), iodoarene **2** (0.24 mmol, 1.2 equiv), 5-arylthiazole **4** (0.2 mmol, 1.0 equiv) and distilled water (1 mL). The test tube was purged with argon and then stirred at 60 °C for 24 h. After cooling the reaction mixture to room temperature, the mixture was suspended in acetone (2 mL) and dichloromethane (5 mL), and then passed through a short silica gel pad (EtOAc). The filtrate was evaporated and the residue was purified by PTLC to afford the desired product **9**.

**2,5-Diphenylthiazole (9aa)<sup>[23]</sup>**

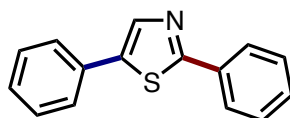

**9aa**

Purification by GPC (Method G) or PTLC (hexane/EtOAc = 10:1) (Method I) gave **9aa** as a white solid (Method G: 89% yield, Method I: 83% yield).  $^1\text{H}$  NMR (600 MHz,  $\text{CDCl}_3$ )  $\delta$  7.34 (t,  $J$  = 7.6 Hz, 1H), 7.39–7.47 (m, 5H), 7.60 (d,  $J$  = 7.6 Hz, 2H), 7.97 (dd,  $J$  = 8.3 Hz, 1.4 Hz, 2H), 8.02 (s, 1H);  $^{13}\text{C}$  NMR (150 MHz,  $\text{CDCl}_3$ )  $\delta$  126.4, 126.7, 128.3, 129.0, 129.1, 130.0, 131.4, 133.7, 139.2, 139.3, 167.2; HRMS (DART)  $m/z$  = 238.0690 calcd for  $\text{C}_{15}\text{H}_{12}\text{NS}$   $[\text{M}+\text{H}]^+$ , found: 238.0688.

**5-(4-Methylphenyl)-2-phenylthiazole (9ab)<sup>[8]</sup>**

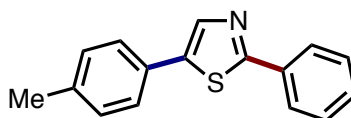

**9ab**

Purification by GPC (Method G) or PTLC (hexane/EtOAc = 10:1) (Method H) gave **9ab** as a white solid (Method G: 85% yield, Method H: 92% yield).  $^1\text{H}$  NMR (600 MHz,  $\text{CDCl}_3$ )  $\delta$  2.36 (s, 3H), 7.20 (d,  $J$  = 8.3 Hz, 2H), 7.35–7.45 (m, 3H), 7.48 (d,  $J$  = 8.3 Hz, 2H), 7.90–8.00 (m, 3H);  $^{13}\text{C}$  NMR (150 MHz,  $\text{CDCl}_3$ )  $\delta$  21.2, 126.3, 126.5, 128.5, 128.9, 129.7, 129.8, 133.7, 138.3, 138.7, 139.4, 166.6; HRMS (DART)  $m/z$  = 252.0847 calcd for  $\text{C}_{16}\text{H}_{14}\text{NS}$   $[\text{M}+\text{H}]^+$ , found: 252.0844.



Supporting Information (Tani, Uehara, Yamaguchi, Itami)  
Programmed Synthesis of Arylthiazoles through Sequential C–H Couplings

**5-(4-Methoxyphenyl)-2-phenylthiazole (9ag)**<sup>[8]</sup>

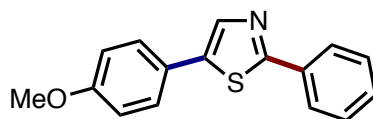

**9ag**

Purification by GPC (Method G) or PTLC (hexane/EtOAc = 10:1) (Method H) gave **9ag** as a white solid (Method G: 81% yield, Method H: 70% yield). <sup>1</sup>H NMR (600 MHz, CDCl<sub>3</sub>) δ 3.82 (s, 3H), 6.93 (dd, *J* = 8.9, 2.1 Hz, 2H), 7.37–7.45 (m, 3H), 7.51 (dd, *J* = 8.9, 2.1 Hz, 2H), 7.90 (s, 1H), 7.94 (dd, *J* = 6.9, 1.4 Hz, 2H); <sup>13</sup>C NMR (150 MHz, CDCl<sub>3</sub>) δ 55.3, 114.5, 124.0, 126.2, 127.9, 128.9, 129.8, 133.8, 138.2, 139.2, 159.8, 166.2; HRMS (DART) *m/z* = 268.0796 calcd for C<sub>16</sub>H<sub>14</sub>NOS [M+H]<sup>+</sup>, found: 268.0799.

**2-(Benzo[d][1,3]dioxol-5-yl)-5-phenylthiazole (9ah)**

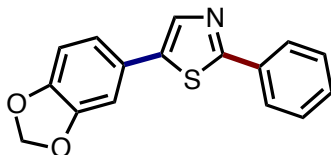

**9ah**

Purification by PTLC (hexane/EtOAc = 2:1) and GPC gave **9ah** as a white solid (Method G: quant). <sup>1</sup>H NMR (600 MHz, CDCl<sub>3</sub>) δ 5.97 (s, 2H), 6.81 (d, *J* = 7.9 Hz, 1H), 7.03–7.08 (m, 2H), 7.37–7.46 (m, 3H), 7.87 (s, 1H), 7.92 (dd, *J* = 7.9, 1.7 Hz, 2H); <sup>13</sup>C NMR (150 MHz, CDCl<sub>3</sub>) δ 101.3, 106.9, 108.8, 120.6, 125.3, 126.2, 128.9, 129.8, 133.6, 138.4, 139.1, 147.8, 148.2, 166.3; HRMS (DART) *m/z* = 282.0589 calcd for C<sub>16</sub>H<sub>12</sub>NO<sub>2</sub>S [M+H]<sup>+</sup>, found: 282.0580.

**2-Phenyl-5-(4-(trifluoromethyl)phenyl)thiazole (9ak)**<sup>[8]</sup>

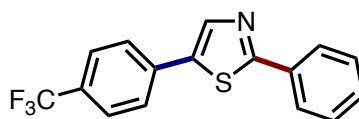

**9ak**

Purification by PTLC (hexane/EtOAc = 10:1) gave **9ak** as a white solid (Method H: 93% yield). <sup>1</sup>H NMR (600 MHz, CDCl<sub>3</sub>) δ 7.42–7.49 (m, 3H), 7.66 (d, *J* = 8.3 Hz, 2H), 7.69 (d, *J* = 8.3 Hz, 2H), 7.95–7.99 (m, 2H), 8.08 (s, 1H); <sup>13</sup>C NMR (150 MHz, CDCl<sub>3</sub>) δ 123.9 (q, *J*<sub>C-F</sub> = 270.2 Hz), 126.1 (q, *J*<sub>C-F</sub> = 4.3 Hz), 126.5, 126.7, 129.0, 130.0 (q, *J*<sub>C-F</sub> = 33.1 Hz), 130.4, 133.3, 134.9, 137.5, 140.4, 168.4; HRMS (DART) *m/z* = 306.0564 calcd for C<sub>16</sub>H<sub>11</sub>F<sub>3</sub>NS [M+H]<sup>+</sup>, found: 306.0565.



**Supporting Information (Tani, Uehara, Yamaguchi, Itami)**  
**Programmed Synthesis of Arylthiazoles through Sequential C–H Couplings**

**Methyl 4-(2-phenylthiazol-5-yl)benzoate (**9an**)<sup>[8]</sup>**

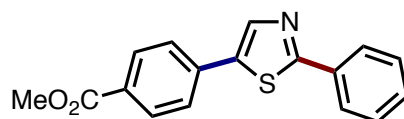

**9an**

Purification by PTLC (hexane/EtOAc = 5:1) gave **9an** as a light yellow solid (Method I: 58% yield). <sup>1</sup>H NMR (600 MHz, CDCl<sub>3</sub>) δ 3.93 (s, 3H), 7.41–7.49 (m, 3H), 7.65 (d, *J* = 8.3 Hz, 2H), 7.97 (dd, *J* = 7.6 Hz, 2.1 Hz, 2H), 8.07 (d, *J* = 8.3 Hz, 2H), 8.10 (s, 1H); <sup>13</sup>C NMR (150 MHz, CDCl<sub>3</sub>) δ 52.2, 126.2, 126.4, 129.0, 129.5, 130.3, 130.4, 133.4, 135.7, 137.9, 140.4, 166.4, 168.3; HRMS (DART) *m/z* = 296.0745 calcd for C<sub>17</sub>H<sub>14</sub>NO<sub>2</sub>S [M+H]<sup>+</sup>, found: 296.0746.

**2-(4-Methylphenyl)-5-phenylthiazole (**9ba**)**

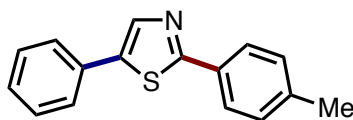

**9ba**

Purification by PTLC (hexane/EtOAc = 10:1) gave **9ba** as a white solid (Method H: 87% yield). <sup>1</sup>H NMR (600 MHz, CDCl<sub>3</sub>) δ 2.40 (s, 3H), 7.26 (d, *J* = 8.3 Hz, 2H), 7.33 (t, *J* = 7.6 Hz, 1H), 7.41 (t, *J* = 7.6 Hz, 2H), 7.60 (d, *J* = 8.3 Hz, 2H), 7.86 (d, *J* = 8.3 Hz, 2H), 7.99 (s, 1H); <sup>13</sup>C NMR (150 MHz, CDCl<sub>3</sub>) δ 21.4, 126.3, 126.6, 128.2, 129.1, 129.6, 131.0, 131.5, 138.7, 139.0, 140.3, 167.4; HRMS (DART) *m/z* = 252.0847 calcd for C<sub>16</sub>H<sub>14</sub>NS [M+H]<sup>+</sup>, found: 252.0847.

**5-(4-Methoxyphenyl)-2-(4-methylphenyl)thiazole (**9bg**)<sup>[8]</sup>**

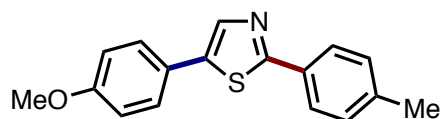

**9bg**

The reaction was performed at 130 °C. Purification by PTLC (hexane/EtOAc = 10:1) gave **9bg** as a light yellow solid (Method H: 82% yield). <sup>1</sup>H NMR (600 MHz, CDCl<sub>3</sub>) δ 2.39 (s, 3H), 3.84 (s, 3H), 6.94 (d, *J* = 8.9 Hz, 2H), 7.24 (d, *J* = 8.2 Hz, 2H), 7.52 (d, *J* = 8.9 Hz, 2H), 7.84 (d, *J* = 8.2 Hz, 2H), 7.88 (s, 1H); <sup>13</sup>C NMR (150 MHz, CDCl<sub>3</sub>) δ 21.4, 55.4, 114.5, 124.2, 126.2, 127.9, 129.6, 131.2, 138.1, 138.7, 140.1, 159.7, 166.5; HRMS (DART) *m/z* = 282.0953 calcd for C<sub>17</sub>H<sub>16</sub>NOS [M+H]<sup>+</sup>, found: 282.0953.



**Supporting Information (Tani, Uehara, Yamaguchi, Itami)**  
**Programmed Synthesis of Arylthiazoles through Sequential C–H Couplings**

**5-(Benzo[d][1,3]dioxol-5-yl)-2-(4-methylphenyl)thiazole (9bh)**

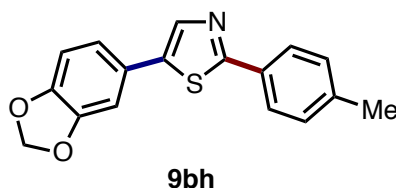

Purification by GPC gave **9bh** as a white solid (Method G: 89% yield).  $^1\text{H}$  NMR (600 MHz,  $\text{CDCl}_3$ )  $\delta$  2.38 (s, 3H), 5.97 (s, 2H), 6.81 (d,  $J = 7.6$  Hz, 1H), 7.02–7.06 (m, 2H), 7.22 (d,  $J = 7.6$  Hz, 2H), 7.81 (d,  $J = 7.6$  Hz, 2H), 7.84 (s, 1H);  $^{13}\text{C}$  NMR (150 MHz,  $\text{CDCl}_3$ )  $\delta$  21.3, 101.3, 106.9, 108.8, 120.5, 125.5, 126.1, 129.6, 131.0, 138.3, 138.6, 140.1, 147.7, 148.2, 166.6; HRMS (DART)  $m/z = 296.0745$  calcd for  $\text{C}_{17}\text{H}_{14}\text{NO}_2\text{S}$   $[\text{M}+\text{H}]^+$ , found: 296.0747.

**5-(4-Chlorophenyl)-2-(4-methylphenyl)thiazole (9bj)<sup>[8]</sup>**

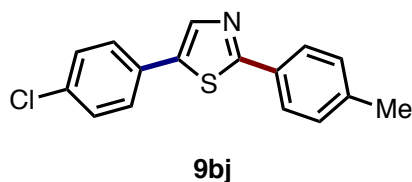

Purification by GPC gave **9bj** as a white solid (Method G: 73% yield).  $^1\text{H}$  NMR (600 MHz,  $\text{CDCl}_3$ )  $\delta$  2.40 (s, 3H), 7.25 (d,  $J = 8.2$  Hz, 2H), 7.37 (d,  $J = 8.2$  Hz, 2H), 7.50 (d,  $J = 8.2$  Hz, 2H), 7.84 (d,  $J = 8.2$  Hz, 2H), 7.95 (s, 1H);  $^{13}\text{C}$  NMR (150 MHz,  $\text{CDCl}_3$ )  $\delta$  21.4, 126.3, 127.7, 129.2, 129.7, 130.0, 130.8, 134.0, 137.4, 139.3, 140.5, 167.7; HRMS (DART)  $m/z = 286.0457$  calcd for  $\text{C}_{16}\text{H}_{13}\text{ClNS}$   $[\text{M}+\text{H}]^+$ , found: 286.0456.

**5-(4-Acetylphenyl)-2-(4-methylphenyl)thiazole (9bo)**

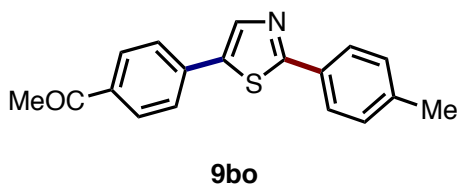

Purification by GPC gave **9bo** as a light yellow solid (Method G: 68% yield).  $^1\text{H}$  NMR (600 MHz,  $\text{CDCl}_3$ )  $\delta$  2.40 (s, 3H), 2.61 (s, 3H), 7.26 (d,  $J = 7.6$  Hz, 2H), 7.67 (d,  $J = 7.6$  Hz, 2H), 7.86 (d,  $J = 7.6$  Hz, 2H), 7.98 (d,  $J = 7.6$  Hz, 2H), 8.09 (s, 1H);  $^{13}\text{C}$  NMR (150 MHz,  $\text{CDCl}_3$ )  $\delta$  21.4, 26.5, 126.4, 129.2, 129.7, 130.7, 136.0, 136.2, 137.3, 140.4, 140.7, 140.9, 168.7, 197.1; HRMS (DART)  $m/z = 294.0953$  calcd for  $\text{C}_{18}\text{H}_{16}\text{NOS}$   $[\text{M}+\text{H}]^+$ , found: 294.0956.

**2-(4-Methylphenyl)-5-(4-nitrophenyl)thiazole (9bq)<sup>[8]</sup>**



**Supporting Information (Tani, Uehara, Yamaguchi, Itami)**  
**Programmed Synthesis of Arylthiazoles through Sequential C–H Couplings**

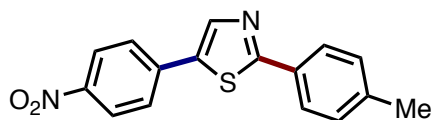

**9bq**

Purification by PTLC (hexane/EtOAc = 10:1) and GPC gave **9bq** as a white solid (Method G: 64% yield).  $^1\text{H}$  NMR (600 MHz,  $\text{CDCl}_3$ )  $\delta$  2.42 (s, 3H), 7.28 (d,  $J$  = 8.2 Hz, 2H), 7.74 (d,  $J$  = 8.9 Hz, 2H), 7.87 (d,  $J$  = 8.2 Hz, 2H), 8.13 (s, 1H), 8.27 (d,  $J$  = 8.9 Hz, 2H);  $^{13}\text{C}$  NMR (150 MHz,  $\text{CDCl}_3$ )  $\delta$  21.5, 124.5, 126.5, 126.8, 129.8, 130.5, 136.0, 137.9, 141.2, 141.3, 147.0, 169.7; HRMS (DART)  $m/z$  = 297.0698 calcd for  $\text{C}_{16}\text{H}_{13}\text{N}_2\text{O}_2\text{S}$   $[\text{M}+\text{H}]^+$ , found: 297.0698.

**2-(3,5-Dimethylphenyl)-5-(4-methoxyphenyl)thiazole (9eg)**

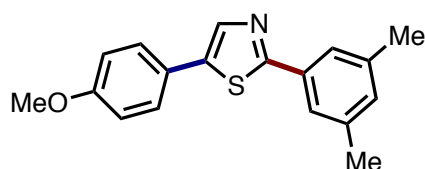

**9eg**

Purification by PTLC (hexane/EtOAc = 10:1) gave **9eg** as a white solid (Method H: 71% yield).  $^1\text{H}$  NMR (600 MHz,  $\text{CDCl}_3$ )  $\delta$  2.38 (s, 6H), 3.84 (s, 3H), 6.94 (d,  $J$  = 8.9 Hz, 2H), 7.05 (s, 1H), 7.52 (d,  $J$  = 8.9 Hz, 2H), 7.58 (s, 2H), 7.89 (s, 1H);  $^{13}\text{C}$  NMR (150 MHz,  $\text{CDCl}_3$ )  $\delta$  21.2, 55.4, 114.5, 124.05, 124.07, 127.9, 131.6, 133.5, 138.0, 138.6, 138.9, 159.7, 166.7; HRMS (DART)  $m/z$  = 296.1109 calcd for  $\text{C}_{18}\text{H}_{18}\text{NOS}$   $[\text{M}+\text{H}]^+$ , found: 296.1110.

**2-(4-Methoxyphenyl)-5-phenylthiazole (9ga)<sup>[24]</sup>**

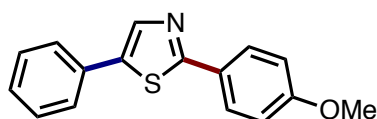

**9ga**

The reaction was performed at 130 °C. Purification by PTLC (hexane/EtOAc = 10:1) gave **9ga** as a white solid (Method H: 86% yield).  $^1\text{H}$  NMR (600 MHz,  $\text{CDCl}_3$ )  $\delta$  3.87 (s, 3H), 6.97 (d,  $J$  = 8.9 Hz, 2H), 7.33 (t,  $J$  = 7.6 Hz, 1H), 7.41 (t,  $J$  = 7.6 Hz, 2H), 7.60 (d,  $J$  = 8.3 Hz, 2H), 7.91 (d,  $J$  = 8.3 Hz, 2H), 7.97 (s, 1H);  $^{13}\text{C}$  NMR (150 MHz,  $\text{CDCl}_3$ )  $\delta$  55.4, 114.4, 126.6, 126.7, 127.9, 128.1, 129.1, 131.6, 138.3, 138.9, 161.2, 167.2; HRMS (DART)  $m/z$  = 268.0796 calcd for  $\text{C}_{12}\text{H}_{14}\text{NO}_3\text{S}$   $[\text{M}+\text{H}]^+$ , found: 268.0795.

**2-(4-Methoxyphenyl)-5-(4-methylphenyl)thiazole (9gb)<sup>[8]</sup>**



**Supporting Information (Tani, Uehara, Yamaguchi, Itami)**  
**Programmed Synthesis of Arylthiazoles through Sequential C–H Couplings**

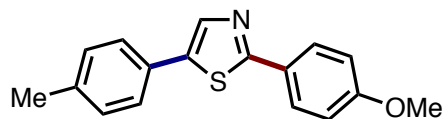

**9gb**

Purification by GPC (Method G) or PTLC (hexane/EtOAc = 10:1) (Method H) gave **9gb** as a light yellow solid (Method G: 75% yield, Method H: 59% yield).  $^1\text{H}$  NMR (600 MHz,  $\text{CDCl}_3$ )  $\delta$  2.37 (s, 3H), 3.85 (s, 3H), 6.95 (d,  $J$  = 8.3 Hz, 2H), 7.20 (d,  $J$  = 8.3 Hz, 2H), 7.47 (d,  $J$  = 8.3 Hz, 2H), 7.89 (d,  $J$  = 8.3 Hz, 2H), 7.92 (s, 1H);  $^{13}\text{C}$  NMR (150 MHz,  $\text{CDCl}_3$ )  $\delta$  21.2, 55.4, 114.3, 126.4, 126.7, 127.8, 128.7, 129.7, 138.1, 138.4, 161.0, 166.6; HRMS (DART)  $m/z$  = 282.0953 calcd for  $\text{C}_{17}\text{H}_{16}\text{NOS}$   $[\text{M}+\text{H}]^+$ , found: 282.0954.

**5-(Benzo[d][1,3]dioxol-5-yl)-2-(4-methoxyphenyl)thiazole (9gh)**

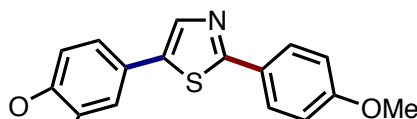

**9gh**

Purification by GPC gave **9gh** as a white solid (Method G: 82% yield).  $^1\text{H}$  NMR (600 MHz,  $\text{CDCl}_3$ )  $\delta$  3.84 (s, 3H), 5.98 (s, 2H), 6.82 (d,  $J$  = 8.9 Hz, 1H), 6.94 (dd,  $J$  = 8.9 Hz, 2.0 Hz, 2H), 7.02–7.06 (m, 2H), 7.81 (s, 1H), 7.86 (dd,  $J$  = 8.9 Hz, 2.0 Hz, 2H);  $^{13}\text{C}$  NMR (150 MHz,  $\text{CDCl}_3$ )  $\delta$  55.3, 101.3, 106.9, 108.7, 114.2, 120.5, 125.5, 126.6, 127.7, 138.1, 138.2, 147.6, 148.2, 161.0, 166.3; HRMS (DART)  $m/z$  = 312.0694 calcd for  $\text{C}_{17}\text{H}_{14}\text{NO}_3\text{S}$   $[\text{M}+\text{H}]^+$ , found: 312.0695.

**2-(4-Methoxyphenyl)-5-(4-(trifluoromethyl)phenyl)thiazole (9gk)**

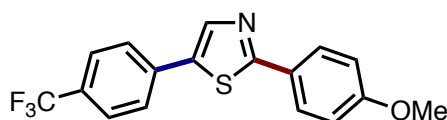

**9gk**

Purification by GPC gave **9gk** as a light yellow solid (Method G: 89% yield).  $^1\text{H}$  NMR (600 MHz,  $\text{CDCl}_3$ )  $\delta$  3.87 (s, 3H), 6.97 (d,  $J$  = 8.9 Hz, 2H), 7.65 (d,  $J$  = 8.3 Hz, 2H), 7.68 (d,  $J$  = 8.3 Hz, 2H), 7.91 (d,  $J$  = 8.9 Hz, 2H), 8.03 (s, 1H);  $^{13}\text{C}$  NMR (150 MHz,  $\text{CDCl}_3$ )  $\delta$  55.4, 114.4, 124.0 (q,  $J_{\text{C-F}}$  = 271.6 Hz), 126.1 (q,  $J_{\text{C-F}}$  = 4.3 Hz), 126.3, 126.6, 128.0, 129.8 (q,  $J_{\text{C-F}}$  = 33.1 Hz), 135.1, 136.5, 140.1, 161.5, 168.3; HRMS (DART)  $m/z$  = 336.0670 calcd for  $\text{C}_{17}\text{H}_{13}\text{F}_3\text{NOS}$   $[\text{M}+\text{H}]^+$ , found: 336.0671.

**2-(4-Methoxyphenyl)-5-(4-pyridyl)thiazole (9gu)**



**Supporting Information (Tani, Uehara, Yamaguchi, Itami)**  
**Programmed Synthesis of Arylthiazoles through Sequential C–H Couplings**

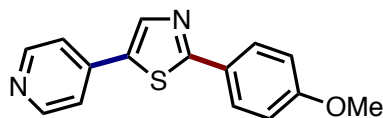

**9gu**

The reaction was performed at 150 °C. Purification by GPC gave **9gu** as a white solid (Method G: 52% yield). <sup>1</sup>H NMR (600 MHz, CDCl<sub>3</sub>) δ 3.88 (s, 3H), 6.98 (d, *J* = 8.9 Hz, 2H), 7.46 (dd, *J* = 4.8, 1.4 Hz, 2H), 7.92 (d, *J* = 8.9 Hz, 2H), 8.14 (s, 1H), 8.63 (dd, *J* = 4.8, 1.4 Hz, 2H); <sup>13</sup>C NMR (150 MHz, CDCl<sub>3</sub>) δ 55.4, 114.4, 120.4, 126.1, 128.1, 135.1, 138.9, 141.2, 150.5, 161.6, 169.2; HRMS (DART) *m/z* = 269.07479 calcd for C<sub>15</sub>H<sub>13</sub>N<sub>2</sub>OS [M+H]<sup>+</sup>, found: 269.0749.

**2-(Benzo[d][1,3]dioxol-5-yl)-5-(4-methoxyphenyl)thiazole (9hg)**

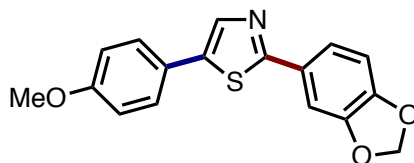

**9hg**

Purification by PTLC (hexane/EtOAc = 3:1) gave **9hg** as a yellow solid (Method I: 87% yield). <sup>1</sup>H NMR (600 MHz, CDCl<sub>3</sub>) δ 3.84 (s, 3H), 6.02 (s, 2H), 6.85 (d, *J* = 8.2 Hz, 1H), 6.93 (d, *J* = 8.9 Hz, 2H), 7.42–7.47 (m, 2H), 7.50 (d, *J* = 8.9 Hz, 2H), 7.84 (s, 1H); <sup>13</sup>C NMR (150 MHz, CDCl<sub>3</sub>) δ 55.4, 101.5, 106.5, 108.6, 114.5, 120.8, 124.0, 127.8, 128.3, 137.9, 138.4, 148.2, 149.1, 159.7, 165.9; HRMS (DART) *m/z* = 312.0694 calcd for C<sub>17</sub>H<sub>14</sub>NO<sub>3</sub>S [M+H]<sup>+</sup>, found: 312.0691.

**2-(4-Chlorophenyl)-5-phenylthiazole (9ja)**

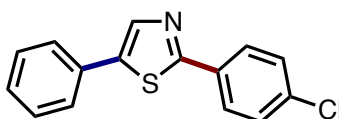

**9ja**

Purification by PTLC (hexane/EtOAc = 10:1) gave **9ja** as a white solid (Method H: 67% yield). <sup>1</sup>H NMR (600 MHz, CDCl<sub>3</sub>) δ 7.34 (t, *J* = 7.6 Hz, 1H), 7.37–7.44 (m, 4H), 7.58 (d, *J* = 7.6 Hz, 2H), 7.89 (d, *J* = 8.2 Hz, 2H), 8.00 (s, 1H); <sup>13</sup>C NMR (150 MHz, CDCl<sub>3</sub>) δ 126.7, 127.5, 128.4, 129.1, 129.2, 131.2, 132.1, 135.9, 139.2, 139.7, 165.7; HRMS (DART) *m/z* = 272.0301 calcd for C<sub>15</sub>H<sub>11</sub>ClNS [M+H]<sup>+</sup>, found: 272.0300.

**2-(4-Chlorophenyl)-5-(4-methylphenyl)thiazole (9jb)**

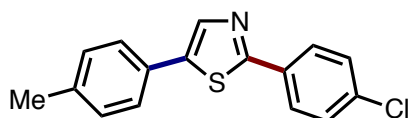

**9jb**





**Supporting Information (Tani, Uehara, Yamaguchi, Itami)**  
**Programmed Synthesis of Arylthiazoles through Sequential C–H Couplings**

The reaction was performed at 130 °C. Purification by PTLC (hexane/EtOAc = 10:1) gave **9jb** as a white solid (Method H: 63% yield). <sup>1</sup>H NMR (600 MHz, CDCl<sub>3</sub>) δ 2.39 (s, 3H), 7.22 (d, *J* = 8.3 Hz, 2H), 7.41 (d, *J* = 8.9 Hz, 2H), 7.48 (d, *J* = 8.3 Hz, 2H), 7.89 (d, *J* = 8.9 Hz, 2H), 7.96 (s, 1H); <sup>13</sup>C NMR (150 MHz, CDCl<sub>3</sub>) δ 21.2, 126.6, 127.5, 128.3, 129.2, 129.8, 132.2, 135.8, 138.5, 138.8, 139.8, 165.2; HRMS (DART) *m/z* = 286.0457 calcd for C<sub>16</sub>H<sub>13</sub>ClNS [M+H]<sup>+</sup>, found: 286.0455.

**5-Phenyl-2-(4-(trifluoromethyl)phenyl)thiazole (9ka)<sup>[25]</sup>**

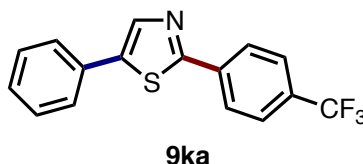

Purification by PTLC (hexane/EtOAc = 10:1) gave **9ka** as a white solid (Method H: 85% yield). <sup>1</sup>H NMR (600 MHz, CDCl<sub>3</sub>) δ 7.37 (t, *J* = 7.6 Hz, 1H), 7.43 (t, *J* = 7.6 Hz, 2H), 7.61 (d, *J* = 7.6 Hz, 2H), 7.71 (d, *J* = 8.2 Hz, 2H), 8.06 (s, 1H), 8.08 (d, *J* = 8.2 Hz, 2H); <sup>13</sup>C NMR (150 MHz, CDCl<sub>3</sub>) δ 123.9 (q, *J*<sub>C-F</sub> = 271.7 Hz), 126.0 (q, *J*<sub>C-F</sub> = 2.9 Hz), 126.5, 126.8, 128.7, 129.2, 131.0, 131.5 (q, *J*<sub>C-F</sub> = 31.6 Hz), 136.7, 139.6, 140.6, 165.1; HRMS (DART) *m/z* = 306.0564 calcd for C<sub>16</sub>H<sub>11</sub>F<sub>3</sub>NS [M+H]<sup>+</sup>, found: 306.0563.

**5-(4-Methoxyphenyl)-2-(4-(trifluoromethyl)phenyl)thiazole (9kg)<sup>[8]</sup>**

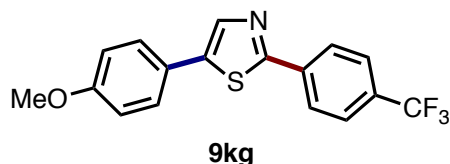

Purification by PTLC (hexane/EtOAc = 10:1) gave **9kg** as a white solid (Method H: 72% yield). <sup>1</sup>H NMR (600 MHz, CDCl<sub>3</sub>) δ 3.84 (s, 3H), 6.95 (d, *J* = 8.9 Hz, 2H), 7.52 (d, *J* = 8.9 Hz, 2H), 7.69 (d, *J* = 8.2 Hz, 2H), 7.95 (s, 1H), 8.04 (d, *J* = 8.2 Hz, 2H); <sup>13</sup>C NMR (150 MHz, CDCl<sub>3</sub>) δ 55.4, 114.6, 123.5, 123.9 (q, *J*<sub>C-F</sub> = 270.2 Hz), 125.9 (q, *J*<sub>C-F</sub> = 4.3 Hz), 126.3, 128.1, 131.3 (q, *J*<sub>C-F</sub> = 33.1 Hz), 136.8, 138.6, 140.5, 160.0, 164.1; HRMS (DART) *m/z* = 336.0670 calcd for C<sub>17</sub>H<sub>13</sub>F<sub>3</sub>NOS [M+H]<sup>+</sup>, found: 336.0672.

**Methyl 4-(2-(4-(trifluoromethyl)phenyl)thiazol-5-yl)benzoate (9kn)**

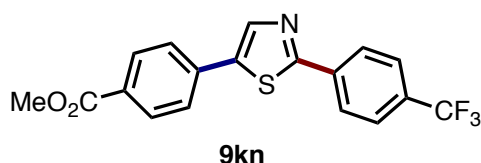

[25] Li, Z.; Ma, L.; Xu, J.; Kong, L.; Wu, X.; Yao, H. *Chem. Comm.* **2012**, 48, 3763.



**Supporting Information (Tani, Uehara, Yamaguchi, Itami)**  
**Programmed Synthesis of Arylthiazoles through Sequential C–H Couplings**

Purification by GPC gave **9kn** as a white solid (Method G: 79% yield).  $^1\text{H}$  NMR (600 MHz,  $\text{CDCl}_3$ )  $\delta$  3.95 (s, 3H), 7.67 (d,  $J$  = 8.3 Hz, 2H), 7.72 (d,  $J$  = 8.3 Hz, 2H), 8.06–8.11 (m, 4H), 8.15 (s, 1H);  $^{13}\text{C}$  NMR (150 MHz,  $\text{CDCl}_3$ )  $\delta$  52.3, 123.8 (q,  $J_{\text{C-F}}$  = 270.2 Hz), 126.0 (q,  $J_{\text{C-F}}$  = 4.3 Hz), 126.4, 126.6, 130.0, 130.5, 131.8 (q,  $J_{\text{C-F}}$  = 33.1 Hz), 135.3, 136.5, 139.3, 140.8, 166.2, 166.4; HRMS (DART)  $m/z$  = 364.0619 calcd for  $\text{C}_{18}\text{H}_{13}\text{F}_3\text{NO}_2\text{S}$   $[\text{M}+\text{H}]^+$ , found: 364.0619.

**Methyl 4-(5-(4-chlorophenyl)thiazol-2-yl)benzoate (9nj)**

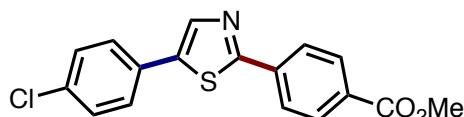

**9nj**

The reaction was performed for 36 h. Purification by GPC gave **9nj** as a white solid (Method G: 48%).  $^1\text{H}$  NMR (600 MHz,  $\text{CDCl}_3$ )  $\delta$  3.95 (s, 3H), 7.40 (d,  $J$  = 8.3 Hz, 2H), 7.54 (d,  $J$  = 8.9 Hz, 2H), 8.00–8.07 (m, 3H), 8.12 (d,  $J$  = 8.3 Hz, 2H);  $^{13}\text{C}$  NMR (150 MHz,  $\text{CDCl}_3$ )  $\delta$  52.3, 126.2, 127.9, 129.4, 129.6, 130.3, 131.2, 134.5, 137.3, 139.2, 139.9, 165.9, 166.4; HRMS (DART)  $m/z$  = 330.0356 calcd for  $\text{C}_{17}\text{H}_{13}\text{ClNOS}$   $[\text{M}+\text{H}]^+$ , found: 330.0357.

**2-(4-Acetylphenyl)-5-(3,5-dimethylphenyl)thiazole (9oe)**

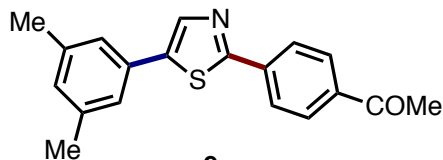

**9oe**

Purification by GPC gave **9oe** as a white solid (Method G: 69% yield).  $^1\text{H}$  NMR (600 MHz,  $\text{CDCl}_3$ )  $\delta$  2.36 (s, 6H), 2.62 (s, 3H), 6.99 (s, 1H), 7.21 (s, 2H), 7.99–8.05 (m, 5H);  $^{13}\text{C}$  NMR (150 MHz,  $\text{CDCl}_3$ )  $\delta$  21.2, 26.6, 124.5, 126.2, 129.0, 130.4, 130.7, 137.55, 137.58, 138.8, 139.4, 141.0, 165.0, 197.2; HRMS (DART)  $m/z$  = 308.1109 calcd for  $\text{C}_{19}\text{H}_{18}\text{NOS}$   $[\text{M}+\text{H}]^+$ , found: 308.1109.

**2-(4-Nitrophenyl)-5-phenylthiazole (9qa)**

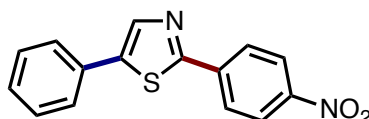

**9qa**

Purification by PTLC ( $\text{CHCl}_3/\text{MeOH}$  = 80:1) gave **9qa** as a yellow solid (Method I: 60% yield).  $^1\text{H}$  NMR (600 MHz,  $\text{CDCl}_3$ )  $\delta$  7.39 (t,  $J$  = 7.6 Hz, 1H), 7.45 (d,  $J$  = 7.6 Hz, 2H), 7.63 (d,  $J$  = 7.6 Hz, 2H), 8.11 (s, 1H), 8.13 (d,  $J$  = 8.9 Hz, 2H), 8.31 (d,  $J$  = 8.9 Hz, 2H);  $^{13}\text{C}$  NMR (150 MHz,  $\text{CDCl}_3$ )  $\delta$  124.4, 126.9, 129.0, 129.3,



**Supporting Information (Tani, Uehara, Yamaguchi, Itami)**  
**Programmed Synthesis of Arylthiazoles through Sequential C–H Couplings**

130.7, 139.1, 140.1, 141.8, 148.3, 163.8; There is one overlapping carbon signal as 1 peak is missing even with prolonged scans. HRMS (DART)  $m/z$  = calcd 283.0541 for  $C_{15}H_{11}N_2O_2S$   $[M+H]^+$ , found: 283.0545.

**5-Phenyl-2-(4-pyridyl)thiazole (9ua)**

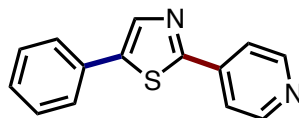

**9ua**

Purification by PTLC (hexane/EtOAc = 2:1) gave **9ua** as a light yellow solid (Method H: 65% yield).  $^1H$  NMR (600 MHz,  $CDCl_3$ )  $\delta$  7.38 (t,  $J$  = 7.6 Hz, 1H), 7.46 (t,  $J$  = 7.6 Hz, 2H), 7.61 (d,  $J$  = 8.3 Hz, 2H), 7.81 (dd,  $J$  = 4.8, 2.0 Hz, 2H), 8.09 (s, 1H), 8.71 (dd,  $J$  = 4.8, 2.0 Hz, 2H);  $^{13}C$  NMR (150 MHz,  $CDCl_3$ )  $\delta$  120.0, 126.8, 128.9, 129.2, 130.7, 139.8, 140.2, 141.3, 150.6, 163.8; HRMS (DART)  $m/z$  = 239.0643 calcd for  $C_{14}H_{11}N_2S$   $[M+H]^+$ , found: 239.0644.

**2-(2-Pyrazin-2-yl)-5-(4-methylphenyl)thiazole (9vb)**

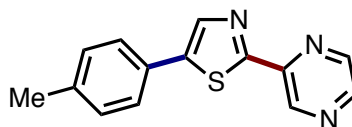

**9vb**

Purification by PTLC (hexane/EtOAc = 3:1) gave **9vb** as a light yellow solid (Method I: 33% yield).  $^1H$  NMR (600 MHz,  $CDCl_3$ )  $\delta$  2.39 (s, 3H), 7.24 (d,  $J$  = 7.6 Hz, 2H), 7.53 (d,  $J$  = 8.2 Hz, 2H), 8.09 (s, 1H), 8.55–8.57 (m, 1H), 8.58 (d,  $J$  = 2.7 Hz, 1H), 9.43 (d,  $J$  = 1.4 Hz, 1H);  $^{13}C$  NMR (150 MHz,  $CDCl_3$ )  $\delta$  21.3, 126.7, 128.2, 129.9, 139.0, 139.6, 141.3, 142.9, 143.8, 144.7, 147.0, 164.4; HRMS (DART)  $m/z$  = 254.0752 calcd for  $C_{14}H_{12}N_3S$   $[M+H]^+$ , found: 254.0750.



**Supporting Information (Tani, Uehara, Yamaguchi, Itami)**  
**Programmed Synthesis of Arylthiazoles through Sequential C–H Couplings**

**7. Synthesis of 2,4-Diarylthiazoles**

**Table S3. Screening of Reaction Conditions**

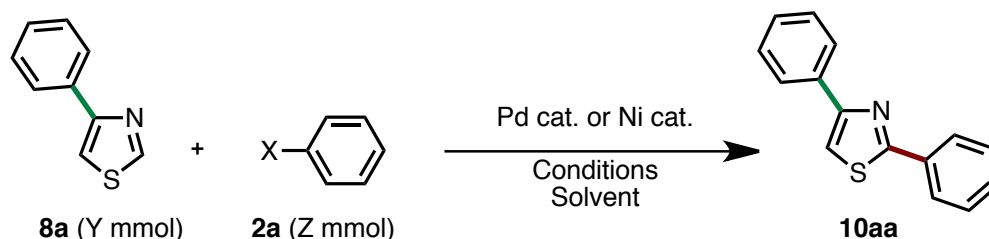

| Entry | X  | Y   | Z    | Conditions | Solvent              | Yield [a] |
|-------|----|-----|------|------------|----------------------|-----------|
| 1     | I  | 0.3 | 0.2  | [b]        | 1,4-dioxane (0.4 M)  | 10%       |
| 2     | I  | 0.2 | 0.4  | [c]        | DMF (0.4 M)          | 22%       |
| 3     | I  | 0.2 | 0.22 | [d]        | DMF (0.25 M)         | 6%        |
| 4     | Br | 0.2 | 0.22 | [e]        | DMF (0.25 M)         | 15%       |
| 5     | Br | 0.2 | 0.24 | [f]        | 1,4-dioxane (0.25 M) | 55%       |

[a] GC yield

[b] Ni(OAc)<sub>2</sub> (10 mol%), bipy (10 mol%), LiOt-Bu (2.0 equiv), 120 °C, 20 h.

[c] Pd(OAc)<sub>2</sub> (5 mol%), Cul (2.0 equiv), 140 °C, 16 h.

[d] Pd(OAc)<sub>2</sub> (5 mol%), P(*o*-tol)<sub>3</sub> (10 mol%), Cs<sub>2</sub>CO<sub>3</sub> (2.0 equiv), 110 °C, 18 h.

[e] Condition C with Johnphos instead of P(*o*-tol)<sub>3</sub>.

[f] Pd[P(*t*-Bu)<sub>3</sub>]<sub>2</sub> (2 mol%), LiOt-Bu (1.2 equiv), 100 °C, 9 h.

**Method C<sup>[7]</sup>**

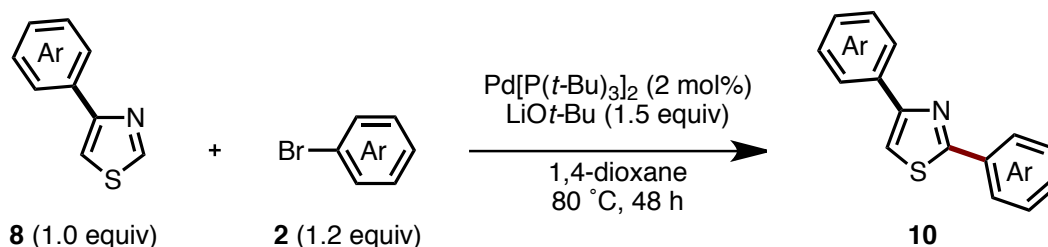

A 25-mL test tube equipped with screw cap, containing a magnetic stirring bar, was flame-dried under vacuum and then cooling to room temperature. To this vessel were added Pd[P(*t*-Bu)<sub>3</sub>]<sub>2</sub> (2.2 mg, 0.004 mol, 2 mol%), LiOt-Bu (24.0 mg, 0.3 mmol, 1.5 equiv), bromoarene **2** (0.24 mmol, 1.2 equiv), 4-arylthiazole **8** (0.2 mmol, 1.0 equiv), and 1,4-dioxane (0.6 mL) under argon atmosphere. The vessel was sealed and then stirred at 80 °C for 48 h. After cooling the reaction mixture to room temperature, the mixture was passed through a short silica gel pad (EtOAc). The filtrate was evaporated and the residue was purified by PTLC and/or GPC to afford 2,4-diarylthiazole **10**.

**Method F<sup>[20]</sup>**

**Supporting Information (Tani, Uehara, Yamaguchi, Itami)**  
**Programmed Synthesis of Arylthiazoles through Sequential C–H Couplings**

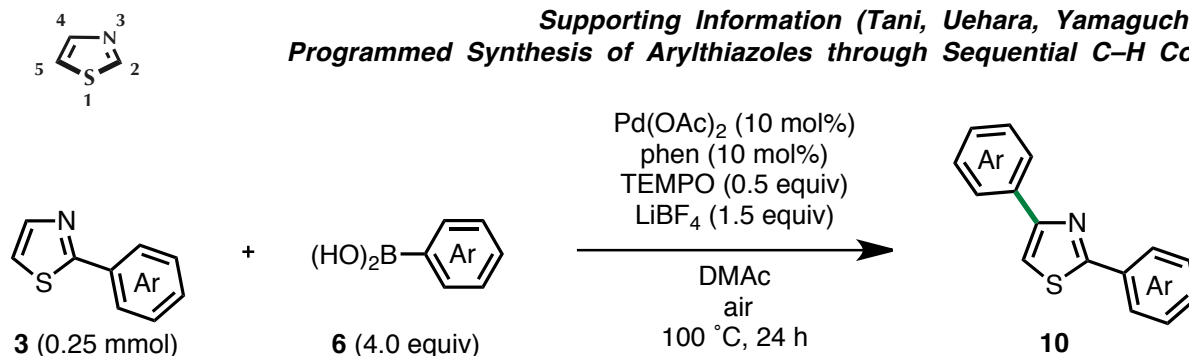

A 25-mL test tube equipped with screw cap, containing a magnetic stirring bar, were added  $\text{Pd}(\text{OAc})_2$  (5.6 mg, 0.025 mmol, 10 mol%), 1,10-phenanthroline (phen: 4.5 mg, 0.025 mmol, 10 mol%), arylboronic acid **6** (1 mmol, 4.0 equiv),  $\text{LiBF}_4$  (35.5 mg, 0.38 mmol, 1.5 equiv), TEMPO (19.5 mg, 0.13 mmol, 0.5 equiv), 2-arylthiazole **3** (0.25 mmol, 1.0 equiv) and undried DMAc (0.5 mL). The vessel was sealed under air and then stirred at 100 °C for 24 h. After cooling the reaction mixture to room temperature, the mixture was passed through a short silica gel pad (EtOAc). The filtrate was evaporated and the residue was purified by PTLC and/or GPC and/or flash column chromatography to afford desired product **10**.

**2,4-Diphenylthiazole (10aa)<sup>[20]</sup>**

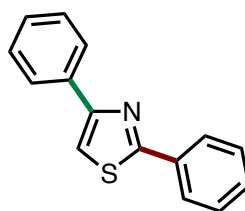

**10aa**

Purification by PTLC (hexane/EtOAc = 20:1 (Method C') or 10:1 (Method F)) gave **10aa** as a white solid (Method C': 77% yield, Method F: 83% yield, 90% C4-selectivity).  $^1\text{H}$  NMR (600 MHz,  $\text{CDCl}_3$ )  $\delta$  7.35 (t,  $J$  = 7.8 Hz, 1H), 7.41–7.50 (m, 6H), 8.00 (dd,  $J$  = 8.3, 1.4 Hz, 2H), 8.05 (dd,  $J$  = 8.3, 1.4 Hz, 2H);  $^{13}\text{C}$  NMR (150 MHz,  $\text{CDCl}_3$ )  $\delta$  112.6, 126.4, 126.6, 128.2, 128.7, 128.9, 130.0, 133.7, 134.5, 156.3, 167.9; HRMS (DART)  $m/z$  = 238.0690 calcd for  $\text{C}_{15}\text{H}_{12}\text{NS}$   $[\text{M}+\text{H}]^+$ , found: 238.0690.

**4-(4-Methylphenyl)-2-phenylthiazole (10ab)<sup>[20]</sup>**

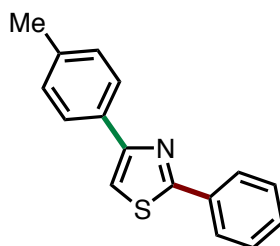

**10ab**

Purification by PTLC (hexane/EtOAc = 10:1) gave **10ab** as a white solid (Method F: 84% yield, 89% C4-selectivity).  $^1\text{H}$  NMR (600 MHz,  $\text{CDCl}_3$ )  $\delta$  2.40 (s, 3H), 7.25 (d,  $J$  = 7.6 Hz, 2H), 7.41–7.50 (m, 4H), 7.89



**Supporting Information (Tani, Uehara, Yamaguchi, Itami)**  
**Programmed Synthesis of Arylthiazoles through Sequential C–H Couplings**

(d,  $J = 7.6$  Hz, 2H), 8.04 (d,  $J = 6.9$  Hz, 2H);  $^{13}\text{C}$  NMR (150 MHz,  $\text{CDCl}_3$ )  $\delta$  21.3, 111.8, 126.3, 126.6, 128.9, 129.4, 129.9, 131.8, 133.8, 138.0, 156.4, 167.7; HRMS (DART)  $m/z = 252.0847$  calcd for  $\text{C}_{16}\text{H}_{14}\text{NS}$   $[\text{M}+\text{H}]^+$ , found: 252.0850.

**4-(*t*-Butylphenyl)-2-phenylthiazole (10ac)**

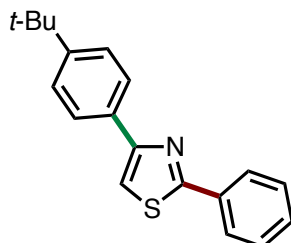

**10ac**

The reaction was performed at 80 °C for 48 h. Purification by PTLC (hexane/EtOAc = 10:1) and GPC gave **10ac** as a white solid (Method F: 88% yield, 90% C4-selectivity).  $^1\text{H}$  NMR (600 MHz,  $\text{CDCl}_3$ )  $\delta$  1.35 (s, 9H), 7.40 (s, 1H), 7.41–7.48 (m, 5H), 7.91 (d,  $J = 8.2$  Hz, 2H), 8.03 (d,  $J = 6.8$  Hz, 2H);  $^{13}\text{C}$  NMR (150 MHz,  $\text{CDCl}_3$ )  $\delta$  31.3, 34.6, 112.0, 125.6, 126.2, 126.6, 128.9, 129.9, 131.8, 133.8, 151.2, 156.4, 167.7; HRMS (DART)  $m/z = 294.1316$  calcd for  $\text{C}_{19}\text{H}_{20}\text{NS}$   $[\text{M}+\text{H}]^+$ , found: 294.1317.

**4-(3,5-Dimethylphenyl)-2-phenylthiazole (10ae)**

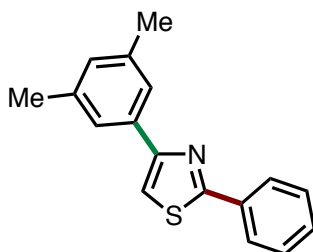

**10ae**

Purification by PTLC (hexane/EtOAc = 10:1) and GPC gave **10ae** as a white solid (Method F: 78% yield, 92% C4-selectivity).  $^1\text{H}$  NMR (600 MHz,  $\text{CDCl}_3$ )  $\delta$  2.38 (s, 6H), 6.99 (s, 1H), 7.38–7.47 (m, 4H), 7.61 (s, 2H), 8.03 (d,  $J = 7.6$  Hz, 2H);  $^{13}\text{C}$  NMR (150 MHz,  $\text{CDCl}_3$ )  $\delta$  21.4, 112.4, 124.3, 126.6, 128.9, 129.86, 129.93, 133.8, 134.3, 138.2, 156.6, 167.7; HRMS (DART)  $m/z = 266.1003$  calcd for  $\text{C}_{17}\text{H}_{16}\text{NS}$   $[\text{M}+\text{H}]^+$ , found: 266.1003.

**4-(4-Methoxyphenyl)-2-phenylthiazole (10ag)<sup>[20]</sup>**



**Supporting Information (Tani, Uehara, Yamaguchi, Itami)**  
**Programmed Synthesis of Arylthiazoles through Sequential C–H Couplings**

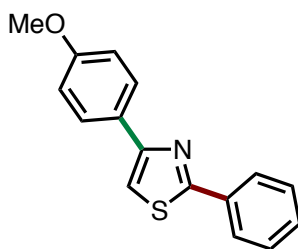

**10ag**

Purification by PTLC (hexane/EtOAc = 10:1) gave **10ag** as a white solid (Method C': 46% yield, Method F: 71% yield, 88% C4-selectivity). <sup>1</sup>H NMR (600 MHz, CDCl<sub>3</sub>) δ 3.86 (s, 3H), 6.98 (d, *J* = 8.9 Hz, 2H), 7.34 (s, 1H), 7.40–7.48 (m, 3H), 7.93 (d, *J* = 8.3 Hz, 2H), 8.04 (d, *J* = 8.3 Hz, 2H); <sup>13</sup>C NMR (150 MHz, CDCl<sub>3</sub>) δ 55.3, 110.9, 114.1, 126.6, 127.5, 127.7, 128.9, 129.9, 133.8, 156.1, 159.7, 167.7; HRMS (DART) *m/z* = 268.0796 calcd for C<sub>16</sub>H<sub>14</sub>NOS [M+H]<sup>+</sup>, found: 268.0794.

**4-(4-Chlorophenyl)-2-phenylthiazole (10aj)**<sup>[26]</sup>

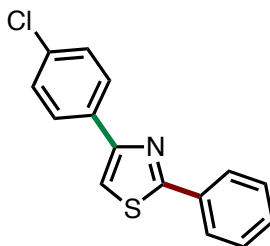

**10aj**

4-MeO-TEMPO (0.125 mmol) was used instead of TEMPO and the reaction was performed for 48 h. Purification by PTLC (hexane/EtOAc = 10:1) gave **10aj** as a white solid (Method F: 59% yield, 75% C4-selectivity). <sup>1</sup>H NMR (600 MHz, CDCl<sub>3</sub>) δ 7.40 (d, *J* = 8.3 Hz, 2H), 7.43–7.48 (m, 4H), 7.92 (d, *J* = 8.9 Hz, 2H), 8.02 (dd, *J* = 8.3, 2.0 Hz, 2H); <sup>13</sup>C NMR (150 MHz, CDCl<sub>3</sub>) δ 112.9, 126.6, 127.7, 128.88, 128.94, 130.2, 133.0, 133.6, 133.9, 155.1, 168.1; HRMS (DART) *m/z* = 272.0301 calcd for C<sub>15</sub>H<sub>11</sub>ClNS [M+H]<sup>+</sup>, found: 272.0301.

**Methyl 4-(2-phenylthiazol-4-yl)benzoate (10an)**

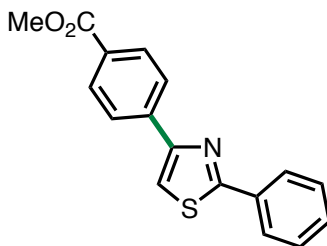

**10an**

The reaction was performed for 48 h. Purification by flash column chromatography (hexane/EtOAc = 5:1)

[26] Zhu, D.; Chen, J.; Xiao, H.; Liu, M.; Ding, J.; Wu, H. *Synth. Commun.* **2009**, 39, 2895.



**Supporting Information (Tani, Uehara, Yamaguchi, Itami)**  
**Programmed Synthesis of Arylthiazoles through Sequential C–H Couplings**

gave **10an** as a colorless solid (Method F: 63% yield, >99% C4-selectivity).  $^1\text{H}$  NMR (600 MHz,  $\text{CDCl}_3$ )  $\delta$  3.93 (s, 3H), 7.41–7.49 (m, 3H), 7.58 (s, 1H), 8.01–8.08 (m, 4H), 8.11 (d,  $J$  = 8.2 Hz, 2H);  $^{13}\text{C}$  NMR (150 MHz,  $\text{CDCl}_3$ )  $\delta$  52.1, 114.5, 126.2, 126.6, 128.9, 129.5, 130.1, 130.2, 133.5, 138.5, 155.1, 166.8, 168.2; HRMS (DART)  $m/z$  = 296.0745 calcd for  $\text{C}_{17}\text{H}_{14}\text{NO}_2\text{S}$   $[\text{M}+\text{H}]^+$ , found: 296.0747.

**4-(4-Methylphenyl)-2-phenylthiazole (**10ba**)**<sup>[27]</sup>

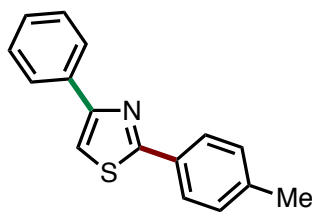

**10ba**

Purification by PTLC (hexane/EtOAc = 10:1) gave **10ba** as a white solid (Method F: 84% yield, 95% C4-selectivity).  $^1\text{H}$  NMR (600 MHz,  $\text{CDCl}_3$ )  $\delta$  2.39 (s, 3H), 7.25 (d,  $J$  = 8.2 Hz, 2H), 7.33 (t,  $J$  = 8.2 Hz, 1H), 7.40–7.45 (m, 3H), 7.92 (d,  $J$  = 7.6 Hz, 2H), 7.98 (d,  $J$  = 8.3 Hz, 2H);  $^{13}\text{C}$  NMR (150 MHz,  $\text{CDCl}_3$ )  $\delta$  21.4, 112.1, 126.4, 126.5, 128.1, 128.7, 129.6, 131.2, 134.6, 140.2, 156.1, 168.0; HRMS (DART)  $m/z$  = 252.0847 calcd for  $\text{C}_{16}\text{H}_{14}\text{NS}$   $[\text{M}+\text{H}]^+$ , found: 252.0846.

**2-(4-Methoxyphenyl)-4-(4-methylphenyl)thiazole (**10bg**)**

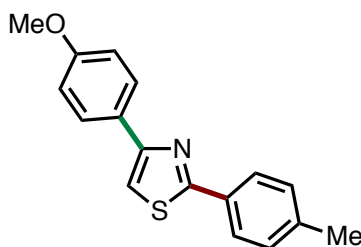

**10bg**

Purification by PTLC (hexane/EtOAc = 10:1) gave **10bg** as a white solid (Method C': 65% yield).  $^1\text{H}$  NMR (600 MHz,  $\text{CDCl}_3$ )  $\delta$  2.39 (s, 3H), 3.84 (s, 3H), 6.96 (d,  $J$  = 8.2 Hz, 2H), 7.24 (d,  $J$  = 8.2 Hz, 2H), 7.28 (s, 1H), 7.91 (d,  $J$  = 8.2 Hz, 4H);  $^{13}\text{C}$  NMR (150 MHz,  $\text{CDCl}_3$ )  $\delta$  21.4, 55.3, 110.4, 114.0, 126.4, 127.6, 127.7, 129.5, 131.2, 140.1, 155.9, 159.6, 167.8; HRMS (DART)  $m/z$  = calcd 282.0953 for  $\text{C}_{17}\text{H}_{16}\text{NOS}$   $[\text{M}+\text{H}]^+$ , found: 282.0950.

**4-(4-Chlorophenyl)-2-(4-methylphenyl)thiazole (**10bj**)**

[27] Ishikawa, Y.; Togo, H. *Synlett* **2008**, 2637.





**Supporting Information (Tani, Uehara, Yamaguchi, Itami)**  
**Programmed Synthesis of Arylthiazoles through Sequential C–H Couplings**

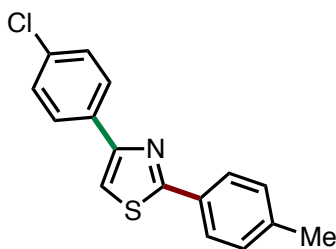

**10bj**

The reaction was performed for 48 h. Purification by flash column chromatography (hexane/EtOAc = 20:1) gave **10bj** as a light yellow solid (Method F: 59% yield, 78% C4-selectivity). <sup>1</sup>H NMR (600 MHz, CDCl<sub>3</sub>) δ 2.40 (s, 3H), 7.25 (d, *J* = 7.6 Hz, 2H), 7.37–7.41 (m, 3H), 7.90 (d, *J* = 7.6 Hz, 2H), 7.91 (d, *J* = 8.2 Hz, 2H); <sup>13</sup>C NMR (150 MHz, CDCl<sub>3</sub>) δ 21.4, 112.4, 126.5, 127.7, 128.8, 129.6, 130.9, 133.0, 133.8, 140.4, 154.9, 168.3; HRMS (DART) *m/z* = 286.0457 calcd for C<sub>16</sub>H<sub>13</sub>ClNS [M+H]<sup>+</sup>, found: 286.0457.

**2-(3,5-Dimethylphenyl)-4-phenylthiazole (10ea)**

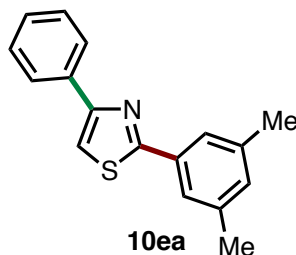

**10ea**

The reaction was performed at 100°C. Purification by PTLC (hexane/EtOAc = 20:1) gave **10ea** as a white solid (Method C': 72% yield). <sup>1</sup>H NMR (600 MHz, CDCl<sub>3</sub>) δ 2.39 (s, 6H), 7.06 (s, 1H), 7.34 (t, *J* = 7.6 Hz, 1H), 7.41–7.46 (m, 3H), 7.66 (s, 2H), 7.99 (d, *J* = 8.3 Hz, 2H); <sup>13</sup>C NMR (150 MHz, CDCl<sub>3</sub>) δ 21.2, 112.4, 124.4, 126.4, 128.1, 128.7, 131.8, 133.5, 134.6, 138.5, 156.1, 168.3; HRMS (DART) *m/z* = 266.1003 calcd for C<sub>17</sub>H<sub>16</sub>NS [M+H]<sup>+</sup>, found: 266.1001.

**2-(4-Methoxyphenyl)-4-phenylthiazole (10ga)<sup>[27]</sup>**

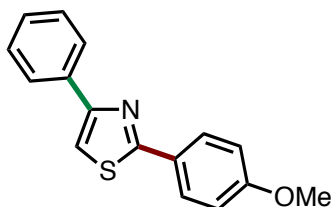

**10ga**

Purification by PTLC (hexane/EtOAc = 10:1) gave **10ga** as a white solid (Method F: 99% yield, >96% C4-selectivity). <sup>1</sup>H NMR (600 MHz, CDCl<sub>3</sub>) δ 3.85 (s, 3H), 6.96 (d, *J* = 8.2 Hz, 2H), 7.33 (t, *J* = 7.6 Hz, 1H), 7.39 (s, 1H), 7.43 (t, *J* = 7.6 Hz, 2H), 7.95–8.00 (m, 4H); <sup>13</sup>C NMR (150 MHz, CDCl<sub>3</sub>) δ 55.2, 111.5, 114.0, 126.2, 126.6, 127.8, 127.9, 128.5, 134.4, 155.8, 161.0, 167.5; HRMS (DART) *m/z* = 268.0796 calcd for



**Supporting Information (Tani, Uehara, Yamaguchi, Itami)**  
**Programmed Synthesis of Arylthiazoles through Sequential C–H Couplings**

$C_{16}H_{14}NOS$   $[M+H]^+$ , found: 268.0797.

**2-(4-Methoxyphenyl)-4-(4-methylphenyl)thiazole (10gb)**

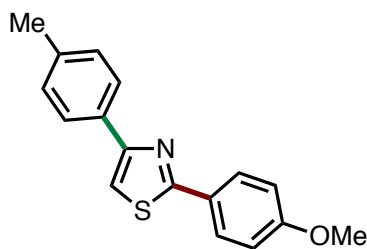

**10gb**

Purification by PTLC (hexane/EtOAc = 10:1) gave **10gb** as a white solid (Method F: 58% yield, 96% C4-selectivity).  $^1H$  NMR (600 MHz,  $CDCl_3$ )  $\delta$  2.38 (s, 3H), 3.85 (s, 3H), 6.95 (d,  $J$  = 8.9 Hz, 2H), 7.23 (d,  $J$  = 8.2 Hz, 2H), 7.33 (s, 1H), 7.87 (d,  $J$  = 8.2 Hz, 2H), 7.96 (d,  $J$  = 8.9 Hz, 2H);  $^{13}C$  NMR (150 MHz,  $CDCl_3$ )  $\delta$  21.2, 55.4, 110.9, 114.2, 126.3, 126.9, 128.0, 129.3, 131.9, 137.8, 156.1, 161.1, 167.5; HRMS (DART)  $m/z$  = 282.0953 calcd for  $C_{17}H_{16}NOS$   $[M+H]^+$ , found: 282.0953.

**4-(4-Chlorophenyl)-2-(4-methoxyphenyl)thiazole (10gj)**

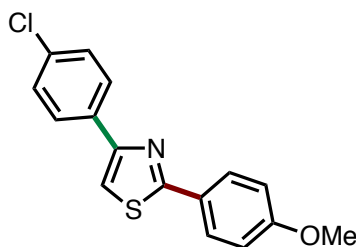

**10gj**

Purification by PTLC (hexane/EtOAc = 10:1) gave **10gj** as a white solid (Method C': 67% yield).  $^1H$  NMR (600 MHz,  $CDCl_3$ )  $\delta$  3.86 (s, 3H), 6.96 (d,  $J$  = 8.2 Hz, 2H), 7.37 (s, 1H), 7.39 (d,  $J$  = 8.9 Hz, 2H), 7.91 (d,  $J$  = 8.2 Hz, 2H), 7.95 (d,  $J$  = 8.9 Hz, 2H);  $^{13}C$  NMR (150 MHz,  $CDCl_3$ )  $\delta$  55.4, 112.0, 114.2, 126.5, 127.6, 128.1, 128.8, 133.1, 133.8, 154.7, 161.2, 167.9; HRMS (DART)  $m/z$  = 302.0406 calcd for  $C_{16}H_{13}ClNOS$   $[M+H]^+$ , found: 302.0406.

**2-(Benzo[d][1,3]dioxol-5-yl)-4-phenylthiazole (10ha)**

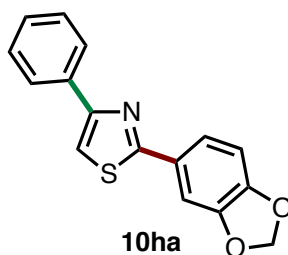

**10ha**

Purification by PTLC (hexane/EtOAc = 10:1) gave **10ha** as a white solid (Method C': 78% yield).  $^1H$  NMR



**Supporting Information (Tani, Uehara, Yamaguchi, Itami)**  
**Programmed Synthesis of Arylthiazoles through Sequential C–H Couplings**

(600 MHz,  $\text{CDCl}_3$ )  $\delta$  6.01 (s, 2H), 6.86 (d,  $J = 8.2$  Hz, 1H), 7.33 (t,  $J = 8.2$  Hz, 1H), 7.38 (s, 1H), 7.43 (t,  $J = 8.2$  Hz, 2H), 7.51 (d,  $J = 8.2$  Hz, 1H), 7.56 (s, 1H), 7.96 (d,  $J = 8.2$  Hz, 2H);  $^{13}\text{C}$  NMR (150 MHz,  $\text{CDCl}_3$ )  $\delta$  101.5, 106.9, 108.5, 111.9, 121.1, 126.4, 128.1, 128.2, 128.7, 134.5, 148.2, 149.2, 155.9, 167.4; HRMS (DART)  $m/z = 282.0589$  calcd for  $\text{C}_{16}\text{H}_{12}\text{NO}_2\text{S}$   $[\text{M}+\text{H}]^+$ , found: 282.0588.

**2-(Benzo[d][1,3]dioxol-5-yl)-4-(4-methylphenyl)thiazole (10hb)**

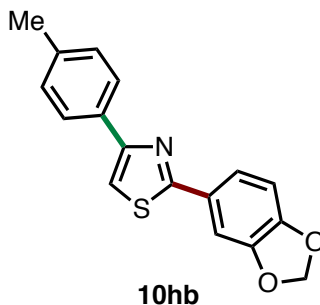

Purification by PTLC (hexane/EtOAc = 20:1) gave **10hb** as a white solid (Method F: 82% yield, 97% C4-selectivity).  $^1\text{H}$  NMR (600 MHz,  $\text{CDCl}_3$ )  $\delta$  2.38 (s, 3H), 6.00 (s, 2H), 6.85 (d,  $J = 8.2$  Hz, 1H), 7.23 (d,  $J = 8.2$  Hz, 2H), 7.31 (s, 1H), 7.50 (dd,  $J = 7.6, 1.4$  Hz, 1H), 7.55 (d,  $J = 1.4$  Hz, 1H), 7.85 (d,  $J = 7.6$  Hz, 2H);  $^{13}\text{C}$  NMR (150 MHz,  $\text{CDCl}_3$ )  $\delta$  21.2, 101.5, 106.9, 108.5, 111.1, 121.0, 126.3, 128.4, 129.4, 131.8, 137.9, 148.2, 149.2, 156.0, 167.3; HRMS (DART)  $m/z = 296.0745$  calcd for  $\text{C}_{17}\text{H}_{14}\text{NO}_2\text{S}$   $[\text{M}+\text{H}]^+$ , found: 296.0746.

**2-(Benzo[d][1,3]dioxol-5-yl)-4-(4-methoxyphenyl)thiazole (10hg)**

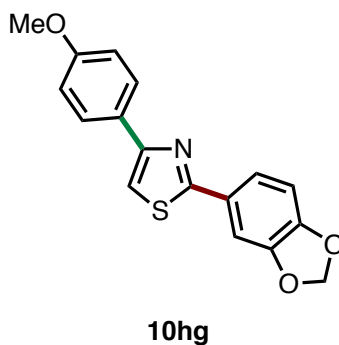

Purification by PTLC (hexane/EtOAc = 10:1) and GPC gave **10hg** as a light yellow solid (Method C': 74% yield).  $^1\text{H}$  NMR (600 MHz,  $\text{CDCl}_3$ )  $\delta$  3.85 (s, 3H), 6.03 (s, 2H), 6.87 (d,  $J = 7.6$  Hz, 1H), 6.96 (d,  $J = 8.9$  Hz, 2H), 7.26 (s, 1H), 7.52 (dd,  $J = 7.6, 1.4$  Hz, 1H), 7.56 (d,  $J = 1.4$  Hz, 1H), 7.90 (d,  $J = 8.9$  Hz, 2H);  $^{13}\text{C}$  NMR (150 MHz,  $\text{CDCl}_3$ )  $\delta$  55.3, 101.5, 106.9, 108.5, 110.2, 114.0, 121.0, 127.5, 127.7, 128.3, 148.2, 149.1, 155.8, 159.6, 167.3; HRMS (DART)  $m/z = 312.0694$  calcd for  $\text{C}_{17}\text{H}_{14}\text{NO}_3\text{S}$   $[\text{M}+\text{H}]^+$ , found: 312.0696.

**4-(4-Methoxyphenyl)-2-(3,4,5-trimethoxyphenyl)thiazole (10ig)**



**Supporting Information (Tani, Uehara, Yamaguchi, Itami)**  
**Programmed Synthesis of Arylthiazoles through Sequential C–H Couplings**

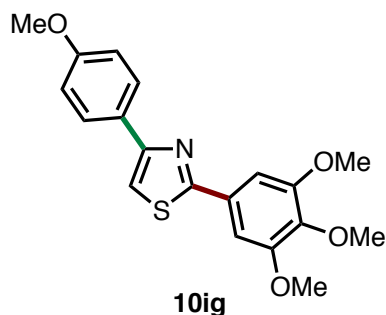

Purification by PTLC (hexane/EtOAc = 3:1) gave **10ig** as a light yellow solid (Method C': 57% yield). <sup>1</sup>H NMR (600 MHz, CDCl<sub>3</sub>) δ 3.85 (s, 3H), 3.91 (s, 3H), 3.97 (s, 6H), 6.97 (d, *J* = 8.2 Hz, 2H), 7.26 (s, 2H), 7.31 (s, 1H), 7.92 (d, *J* = 8.2 Hz, 2H); <sup>13</sup>C NMR (150 MHz, CDCl<sub>3</sub>) δ 55.3, 56.3, 60.9, 103.8, 110.8, 114.0, 127.4, 127.7, 129.4, 139.7, 153.5, 155.9, 159.6, 167.5; HRMS (DART) *m/z* = 358.1113 calcd for C<sub>19</sub>H<sub>20</sub>NO<sub>4</sub>S [M+H]<sup>+</sup>, found: 358.1114.

**2-(4-Chlorophenyl)-4-phenylthiazole (10ja)**

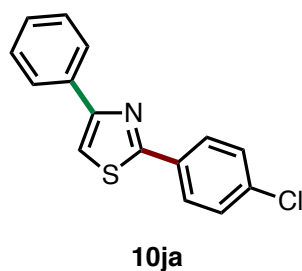

The reaction was performed for 48 h. Purification by PTLC (hexane/EtOAc = 10:1) gave **10ja** as a white solid (Method F: 64% yield, 82% C4-selectivity). <sup>1</sup>H NMR (600 MHz, CDCl<sub>3</sub>) δ 7.35 (t, *J* = 8.2 Hz, 1H), 7.40–7.48 (m, 5H), 7.94–8.01 (m, 4H); <sup>13</sup>C NMR (150 MHz, CDCl<sub>3</sub>) δ 112.8, 126.4, 127.8, 128.3, 128.7, 129.1, 132.3, 134.3, 135.9, 156.5, 166.5; HRMS (DART) *m/z* = 272.0301 calcd for C<sub>15</sub>H<sub>11</sub>ClNS [M+H]<sup>+</sup>, found: 272.0301.

**2-(4-Chlorophenyl)-4-(4-methylphenyl)thiazole (10jb)**

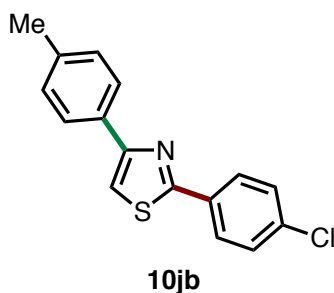

Purification by PTLC (hexane/EtOAc = 20:1) gave **10jb** as a white solid (Method C': 70% yield). <sup>1</sup>H NMR (600 MHz, CDCl<sub>3</sub>) δ 2.40 (s, 3H), 7.25 (d, *J* = 8.2 Hz, 2H), 7.41–7.44 (m, 3H), 7.87 (d, *J* = 8.2 Hz, 2H), 7.97 (d, *J* = 8.9 Hz, 2H); <sup>13</sup>C NMR (150 MHz, CDCl<sub>3</sub>) δ 21.3, 112.1, 126.3, 127.7, 129.1, 129.4, 131.6, 132.3,



**Supporting Information (Tani, Uehara, Yamaguchi, Itami)**  
**Programmed Synthesis of Arylthiazoles through Sequential C–H Couplings**

135.8, 138.1, 156.5, 166.3; HRMS (DART)  $m/z$  = 286.0457 calcd for  $C_{16}H_{13}ClNS$   $[M+H]^+$ , found: 286.0456.

**Methyl 4-(4-(4-chlorophenyl)thiazol-4-yl)benzoate (10jn)**

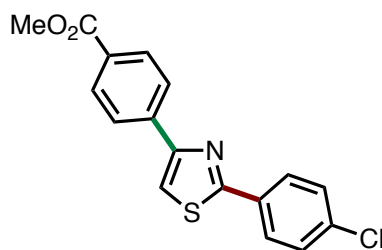

**10jn**

The reaction was performed for 48 h. Purification by flash column chromatography (hexane/EtOAc = 5:1) gave **10jn** as a white solid (Method F: 45% yield, >99% C4-selectivity).  $^1H$  NMR (600 MHz,  $CDCl_3$ )  $\delta$  3.94 (s, 3H), 7.43 (d,  $J$  = 8.2 Hz, 2H), 7.59 (s, 1H), 7.95–7.97 (m, 2H), 8.04 (d,  $J$  = 8.2 Hz, 2H), 8.10 (d,  $J$  = 8.2 Hz, 2H).  $^{13}C$  NMR (150 MHz,  $CDCl_3$ )  $\delta$  52.1, 114.7, 126.2, 127.2, 127.8, 129.2, 129.6, 129.6, 130.10, 130.2, 131.9, 136.2, 138.3, 155.2, 166.80, 166.83; HRMS (DART)  $m/z$  = calcd 330.0356 for  $C_{17}H_{13}ClNO_2S$   $[M+H]^+$ , found: 330.0357.

**2-(4-(Trifluoromethyl)phenyl)-4-phenylthiazole (10ka)**

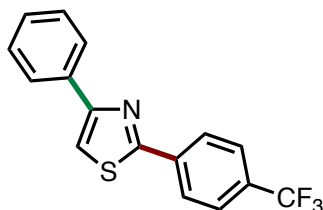

**10ka**

Purification by PTLC (hexane/EtOAc = 10:1) gave **10ka** as a white solid (Method F: 69% yield, 77% C4-selectivity).  $^1H$  NMR (600 MHz,  $CDCl_3$ )  $\delta$  7.37 (t,  $J$  = 7.6 Hz, 1H), 7.45 (t,  $J$  = 7.6 Hz, 2H), 7.52 (s, 1H), 7.70 (d,  $J$  = 8.2 Hz, 2H), 7.99 (d,  $J$  = 7.6 Hz, 2H), 8.14 (d,  $J$  = 8.2 Hz, 2H);  $^{13}C$  NMR (150 MHz,  $CDCl_3$ )  $\delta$  113.6, 124.0 (q,  $J_{C-F}$  = 271.7 Hz), 125.9 (q,  $J_{C-F}$  = 4.3 Hz), 126.5, 126.8, 128.4, 128.8, 131.6 (q,  $J_{C-F}$  = 33.1 Hz), 134.2, 136.8, 156.9, 165.9; HRMS (DART)  $m/z$  = 306.0564 calcd for  $C_{16}H_{11}F_3NS$   $[M+H]^+$ , found: 306.0563.

**2-(4-(Trifluoromethyl)phenyl)-4-(4-methylphenyl)thiazole (10kb)**



**Supporting Information (Tani, Uehara, Yamaguchi, Itami)**  
**Programmed Synthesis of Arylthiazoles through Sequential C–H Couplings**

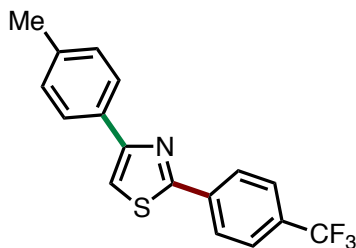

**10kb**

Purification by GPC gave **10kb** as a white solid (Method C': 63% yield).  $^1\text{H}$  NMR (600 MHz,  $\text{CDCl}_3$ )  $\delta$  2.39 (s, 3H), 7.24 (d,  $J = 8.3$  Hz, 2H), 7.40–7.43 (m, 3H), 7.86 (d,  $J = 8.3$  Hz, 2H), 7.96 (d,  $J = 8.3$  Hz, 2H);  $^{13}\text{C}$  NMR (150 MHz,  $\text{CDCl}_3$ )  $\delta$  21.3, 112.8, 123.9 (q,  $J_{\text{C-F}} = 271.7$  Hz), 125.9 (q,  $J_{\text{C-F}} = 2.9$  Hz), 126.3, 126.7, 129.5, 131.4, 131.5 (q,  $J_{\text{C-F}} = 33.1$  Hz), 136.9, 138.3, 156.9, 165.8; HRMS (DART)  $m/z = 320.0721$  calcd for  $\text{C}_{17}\text{H}_{13}\text{F}_3\text{NS}$   $[\text{M}+\text{H}]^+$ , found: 320.0720.

**Methyl 4-(4-phenylthiazol-2-yl)benzoate (10na)**

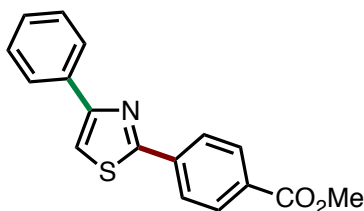

**10na**

Purification by flash column chromatography (hexane/EtOAc = 10:1) gave **10na** as a white solid (Method F: 65% yield, 82% C4-selectivity).  $^1\text{H}$  NMR (600 MHz,  $\text{CDCl}_3$ )  $\delta$  3.93 (s, 3H), 7.35 (t,  $J = 7.6$  Hz, 1H), 7.44 (d,  $J = 7.6$  Hz, 2H), 7.51 (s, 1H), 7.98 (d,  $J = 8.2$  Hz, 2H), 8.07–8.13 (m, 4H);  $^{13}\text{C}$  NMR (150 MHz,  $\text{CDCl}_3$ )  $\delta$  52.2, 113.6, 126.35, 126.44, 128.3, 128.7, 130.2, 131.1, 134.2, 137.5, 156.8, 166.3, 166.5; HRMS (DART)  $m/z = 296.0745$  calcd for  $\text{C}_{17}\text{H}_{14}\text{NO}_2\text{S}$   $[\text{M}+\text{H}]^+$ , found: 296.0746.

**2-(4-Acetylphenyl)-4-phenylthiazole (10oa)**

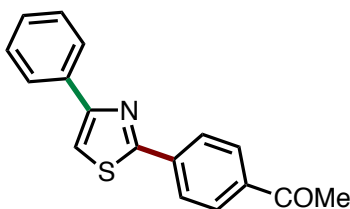

**10oa**

Purification by PTLC (hexane/EtOAc = 10:1) gave **10oa** as a white solid (Method F: 71% yield, 77% C4-selectivity).  $^1\text{H}$  NMR (600 MHz,  $\text{CDCl}_3$ )  $\delta$  2.64 (s, 3H), 7.37 (t,  $J = 7.6$  Hz, 1H), 7.46 (t,  $J = 7.6$  Hz, 2H), 7.55 (s, 1H), 8.00 (d,  $J = 8.3$  Hz, 2H), 8.04 (d,  $J = 8.9$  Hz, 2H), 8.13 (d,  $J = 8.9$  Hz, 2H);  $^{13}\text{C}$  NMR (150 MHz,



**Supporting Information (Tani, Uehara, Yamaguchi, Itami)**  
**Programmed Synthesis of Arylthiazoles through Sequential C–H Couplings**

$\text{CDCl}_3$ )  $\delta$  26.7, 113.7, 126.5, 126.6, 128.4, 128.8, 129.0, 134.2, 137.6, 137.9, 156.9, 166.3, 197.3; HRMS (DART)  $m/z$  = 280.0796 calcd for  $\text{C}_{17}\text{H}_{14}\text{NOS}$   $[\text{M}+\text{H}]^+$ , found: 280.0796.

**2-(5-Methylthiophen-2-yl)-4-phenylthiazole (10ra)**

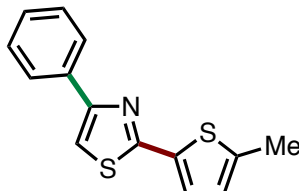

**10ra**

Purification by PTLC (hexane/EtOAc = 20:1) gave **10ra** as a light yellow solid (Method C': 62% yield).  $^1\text{H}$  NMR (600 MHz,  $\text{CDCl}_3$ )  $\delta$  2.51 (s, 3H), 6.73 (d,  $J$  = 2.8 Hz, 1H), 7.30–7.36 (m, 3H), 7.42 (t,  $J$  = 7.6 Hz, 2H), 7.94 (d,  $J$  = 7.6 Hz, 2H);  $^{13}\text{C}$  NMR (150 MHz,  $\text{CDCl}_3$ )  $\delta$  15.5, 111.2, 126.1, 126.4, 126.6, 128.1, 128.7, 134.2, 135.1, 142.8, 155.6, 161.7; HRMS (DART)  $m/z$  = 258.0411 calcd for  $\text{C}_{14}\text{H}_{12}\text{NS}_2$   $[\text{M}+\text{H}]^+$ , found: 258.0410.

**2-(3-Pyridyl)-4-(4-methylphenyl)thiazole (10tb)**

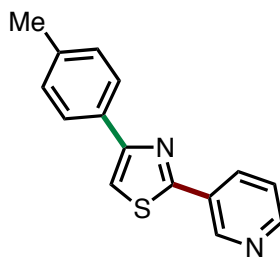

**10tb**

**4b** (1.5 equiv), 3-bromopyridine (1.0 equiv) and  $\text{LiOt-Bu}$  (2.0 equiv) were used and the reaction was performed at 100 °C. Purification by PTLC (hexane/EtOAc = 5:1) gave **10tb** as a light yellow solid (Method C': 82% yield).  $^1\text{H}$  NMR (600 MHz,  $\text{CDCl}_3$ )  $\delta$  2.40 (s, 3H), 7.27 (d,  $J$  = 8.3 Hz, 2H), 7.40 (dd,  $J$  = 8.2 Hz, 4.8 Hz, 1H), 7.49 (s, 1H), 7.89 (d,  $J$  = 8.3 Hz, 2H), 8.33 (dt,  $J$  = 7.6 Hz, 2.0 Hz, 1H), 8.67 (dd,  $J$  = 4.8 Hz, 1.4 Hz, 1H), 9.24 (d,  $J$  = 2.0 Hz, 1H);  $^{13}\text{C}$  NMR (150 MHz,  $\text{CDCl}_3$ )  $\delta$  21.3, 112.5, 123.7, 126.4, 129.5, 129.8, 131.4, 133.6, 138.3, 147.8, 150.7, 156.9, 164.2; HRMS (DART)  $m/z$  = 253.0799 calcd for  $\text{C}_{15}\text{H}_{13}\text{N}_2\text{S}$   $[\text{M}+\text{H}]^+$ , found: 253.0799.

**2-(6-Methoxynaphthalen-2-yl)-4-phenylthiazole (10wa)**

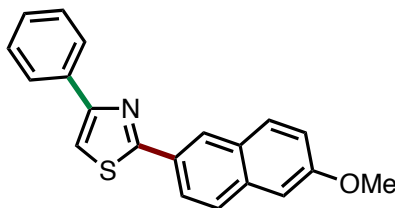

**10wa**



**Supporting Information (Tani, Uehara, Yamaguchi, Itami)**  
**Programmed Synthesis of Arylthiazoles through Sequential C–H Couplings**

The reaction was performed at 100 °C. GPC gave **10wa** as light yellow solid (Method C': 68% yield). <sup>1</sup>H NMR (600 MHz, CDCl<sub>3</sub>) δ 3.94 (s, 3H), 7.16 (s, 1H), 7.19 (dd, *J* = 8.3, 2.1 Hz, 1H), 7.36 (t, *J* = 7.6 Hz, 1H), 7.44–7.49 (m, 3H), 7.80 (d, *J* = 8.2 Hz, 1H), 7.84 (d, *J* = 8.2 Hz, 1H), 8.03 (d, *J* = 7.6 Hz, 2H), 8.13 (dd, *J* = 8.2, 2.1 Hz, 1H), 8.43 (s, 1H); <sup>13</sup>C NMR (150 MHz, CDCl<sub>3</sub>) δ 55.3, 105.8, 112.3, 119.6, 124.7, 125.8, 126.5, 127.4, 128.1, 128.65, 128.73, 129.1, 130.1, 134.6, 135.5, 156.3, 158.5, 168.1; HRMS (DART) *m/z* = 318.0953 calcd for C<sub>20</sub>H<sub>16</sub>NOS [M+H]<sup>+</sup>, found: 318.0953.

**Synthesis of Fatostatin<sup>[28]</sup>**

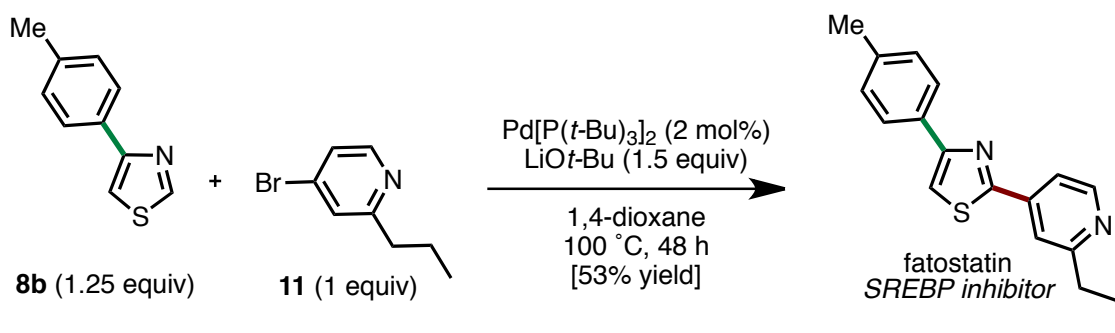

**4b** (1.25 equiv), 4-bromo-2-propylpyridine (1.0 equiv) and LiOt-Bu (1.5 equiv) at 100 °C for 48 h. PTLC (hexane/EtOAc = 2:1) gave Fatostatin as a light yellow solid (Method C': 53% yield). <sup>1</sup>H NMR (600 MHz, CDCl<sub>3</sub>) δ 1.02 (t, *J* = 7.6 Hz, 3H), 1.80–1.87 (m, 2H), 2.40 (s, 3H), 2.86 (t, *J* = 7.6 Hz, 2H), 7.26 (d, *J* = 8.2 Hz, 2H), 7.50 (s, 1H), 7.67 (dd, *J* = 4.9, 2.0 Hz, 1H), 7.76 (s, 1H), 7.88 (d, *J* = 8.2 Hz, 2H), 8.62 (d, *J* = 8.1 Hz, 1H); <sup>13</sup>C NMR (150 MHz, CDCl<sub>3</sub>) δ 13.9, 21.3, 23.1, 40.4, 113.3, 117.8, 119.3, 126.3, 129.5, 131.3, 138.4, 140.6, 150.0, 157.1, 163.4, 165.2; HRMS (DART) *m/z* = 295.1269 calcd for C<sub>18</sub>H<sub>19</sub>N<sub>2</sub>S [M+H]<sup>+</sup>, found: 295.1268.

[28] Kamisuki, S.; Mao, Q.; Abu-Elheiga, L.; Gu, Z.; Kugimiya, A.; Kwon, Y.; Shinohara, T.; Kawazoe, Y.; Sato, S.; Asakura, K.; Choo, H. -Y. P.; Sakai, J.; Wakil, S. J.; Uesugi, M. *Chem. Biol.* **2009**, *16*, 882.





Supporting Information (Tani, Uehara, Yamaguchi, Itami)  
Programmed Synthesis of Arylthiazoles through Sequential C–H Couplings

## 8. Synthesis of 4,5-Diarylthiazoles

Table S4. Screening of Reaction Conditions

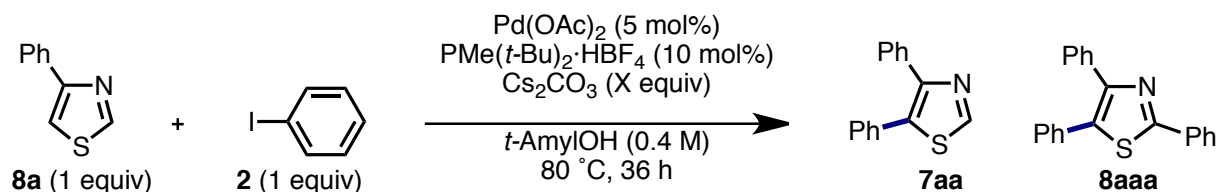

| Entry | X   | Time | Temp   | 7aa [a]     | 8aaa [b] |
|-------|-----|------|--------|-------------|----------|
| 1     | 1   | 12 h | 100 °C | 0.81 (68%)  | 20%      |
| 2     | 1   | 12 h | 80 °C  | 0.73        | 7%       |
| 3     | 1   | 12 h | 90 °C  | 0.83        | 13%      |
| 4     | 1   | 36 h | 80 °C  | 0.90        | 19%      |
| 5     | 1   | 36 h | 75 °C  | 0.78        | 13%      |
| 6     | 1.5 | 36 h | 80 °C  | 0.995 (77%) | 14%      |

[a] GC ratio of **7a**/*n*-dodecane. The number in bracket was isolated yield. [b] GC yield.

### Method D<sup>[15]</sup>

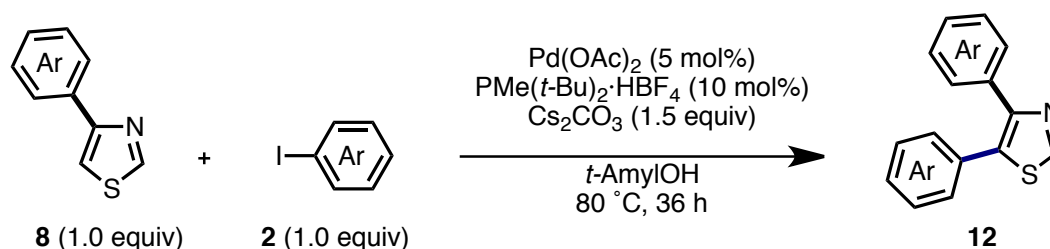

A 7-mL test tube equipped with screw cap, containing a magnetic stirring bar, was flame-dried under vacuum and then cooling to room temperature. To this vessel were added  $\text{Pd}(\text{OAc})_2$  (2.2 mg, 0.01 mmol, 5 mol%),  $\text{PMe}(t\text{-Bu})_2\cdot\text{HBF}_4$  (5.0 mg, 0.02 mmol, 10 mol%),  $\text{Cs}_2\text{CO}_3$  (97.8 mg, 0.3 mmol, 1.5 equiv), iodoarene **2** (0.2 mmol, 1.0 equiv), 4-arylthiazole **8** (0.2 mmol, 1.0 equiv), and *t*-AmylOH (0.5 mL) under argon atmosphere. The vessel was sealed and then stirred at 80 °C for 36 h. After cooling the reaction mixture to room temperature, the mixture was passed through a short silica gel pad (EtOAc). The filtrate was evaporated and the residue was purified by PTLC and GPC. For further purification, the obtained product was passed through NH-silica gel pad (EtOAc) to afford 4,5-diarylthiazole **12**.

### 4,5-Diphenylthiazole (**12aa**)<sup>[29]</sup>

[29] Lingaraju, G. S.; Swaroop, T. R.; Vinayaka, A. C.; Kumar, K. S. S.; Sadashiva, M. P.; Rangappa, K. S. *Synthesis* **2012**, *44*, 1373.



**Supporting Information (Tani, Uehara, Yamaguchi, Itami)**  
**Programmed Synthesis of Arylthiazoles through Sequential C–H Couplings**

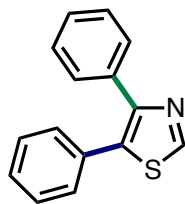

**12aa**

Purification by PTLC (hexane/EtOAc = 10:1) gave **12aa** as a white solid (Method D: 77% yield).  $^1\text{H}$  NMR (600 MHz,  $\text{CDCl}_3$ )  $\delta$  7.27–7.38 (m, 8H), 7.51–7.55 (m, 2H), 8.81 (s, 1H);  $^{13}\text{C}$  NMR (150 MHz,  $\text{CDCl}_3$ )  $\delta$  127.8, 128.27, 128.30, 128.8, 129.0, 129.7, 131.8, 132.9, 134.6, 150.7, 151.0; HRMS (DART)  $m/z$  = 238.0690 calcd for  $\text{C}_{15}\text{H}_{12}\text{NS}$   $[\text{M}+\text{H}]^+$ , found: 238.0690.

**5-(4-Methylphenyl)-4-phenylthiazole (12ab)<sup>[29]</sup>**

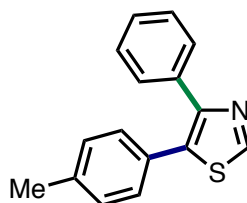

**12ab**

Purification by GPC gave **12ab** as a white solid (Method D: 69% yield).  $^1\text{H}$  NMR (600 MHz,  $\text{CDCl}_3$ )  $\delta$  2.36 (s, 3H), 7.13 (d,  $J$  = 8.3 Hz, 2H), 7.25 (d,  $J$  = 8.3 Hz, 2H), 7.27–7.32 (m, 3H), 7.54 (dd,  $J$  = 7.6, 1.4 Hz, 2H), 8.78 (s, 1H);  $^{13}\text{C}$  NMR (150 MHz,  $\text{CDCl}_3$ )  $\delta$  21.2, 127.7, 128.3, 128.8, 129.0, 129.48, 129.54, 133.1, 134.8, 138.2, 150.3, 150.7; HRMS (DART)  $m/z$  = 252.0847 calcd for  $\text{C}_{16}\text{H}_{14}\text{NS}$   $[\text{M}+\text{H}]^+$ , found: 252.0847.

**5-(4-Methoxyphenyl)-4-phenylthiazole (12ag)<sup>[29]</sup>**

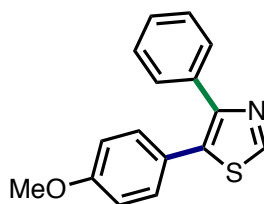

**12ag**

Purification by GPC gave **12ag** as a light yellow oil (Method D: 75% yield).  $^1\text{H}$  NMR (600 MHz,  $\text{CDCl}_3$ )  $\delta$  3.81 (s, 3H), 6.86 (d,  $J$  = 8.2 Hz, 2H), 7.24–7.31 (m, 5H), 7.54 (dd,  $J$  = 8.2, 1.4 Hz, 2H), 8.76 (s, 1H);  $^{13}\text{C}$  NMR (150 MHz,  $\text{CDCl}_3$ )  $\delta$  55.3, 114.2, 123.9, 127.7, 128.3, 128.9, 130.9, 132.8, 134.8, 150.1, 150.5, 159.7; HRMS (DART)  $m/z$  = 268.0796 calcd for  $\text{C}_{16}\text{H}_{14}\text{NOS}$   $[\text{M}+\text{H}]^+$ , found: 268.0798.

**5-(3,4,5-Trimethoxyphenyl)-4-phenylthiazole (12ai)<sup>[29]</sup>**



**Supporting Information (Tani, Uehara, Yamaguchi, Itami)**  
**Programmed Synthesis of Arylthiazoles through Sequential C–H Couplings**

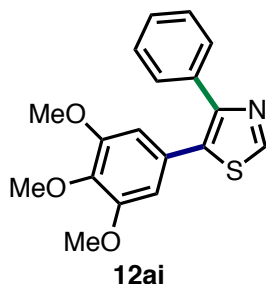

3,4,5-Trimethoxybromobenzene (**2i**) (1.0 equiv) was used and the reaction was performed at 100 °C for 18 h. Purification by GPC gave **12ai** as a light yellow solid (Method D: 60% yield). <sup>1</sup>H NMR (600 MHz, CDCl<sub>3</sub>) δ 3.70 (s, 6H), 3.88 (s, 3H), 6.55 (s, 2H), 7.27–7.34 (m, 3H), 7.57 (dd, *J* = 8.3 Hz, 1.4 Hz, 2H), 8.79 (s, 1H); <sup>13</sup>C NMR (150 MHz, CDCl<sub>3</sub>) δ 56.0, 60.9, 106.9, 127.0, 127.9, 128.3, 129.0, 132.9, 134.7, 138.1, 150.57, 150.61, 153.3. HRMS (DART) *m/z* = 328.1007 calcd for C<sub>18</sub>H<sub>18</sub>NO<sub>3</sub>S [M+H]<sup>+</sup>, found: 328.1005.

**5-(4-Chlorophenyl)-4-phenylthiazole (12aj)**

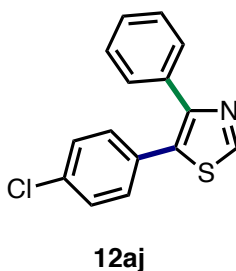

Purification by GPC gave **12aj** as a light yellow solid (Method D: 66% yield). <sup>1</sup>H NMR (600 MHz, CDCl<sub>3</sub>) δ 7.26–7.34 (m, 7H), 7.51 (dd, *J* = 7.6, 2.0 Hz, 2H), 8.81 (s, 1H); <sup>13</sup>C NMR (150 MHz, CDCl<sub>3</sub>) δ 128.1, 128.4, 128.97, 129.02, 130.3, 130.9, 131.5, 134.3, 151.1, 151.2; There is one overlapping carbon signal as 1 peak is missing even with prolonged scans. HRMS (DART) *m/z* = 272.0301 calcd for C<sub>15</sub>H<sub>11</sub>ClNS [M+H]<sup>+</sup>, found: 272.0301.

**5-(4-(Trifluoromethyl)phenyl)-4-phenylthiazole (12ak)**

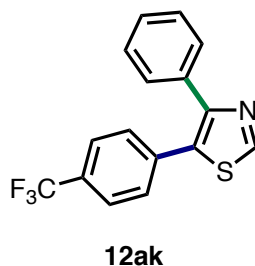

Purification by GPC gave **12ak** as a white solid (Method D: 59% yield). <sup>1</sup>H NMR (600 MHz, CDCl<sub>3</sub>) δ 7.29–7.35 (m, 3H), 7.47 (d, *J* = 8.3 Hz, 2H), 7.50 (dd, *J* = 7.6, 2.0 Hz, 2H), 7.58 (d, *J* = 8.3 Hz, 2H), 8.86 (s, 1H); <sup>13</sup>C NMR (150 MHz, CDCl<sub>3</sub>) δ 123.9 (q, *J*<sub>C-F</sub> = 270.2 Hz), 125.7 (q, *J*<sub>C-F</sub> = 2.9 Hz), 128.3, 128.5, 129.1,



**Supporting Information (Tani, Uehara, Yamaguchi, Itami)**  
**Programmed Synthesis of Arylthiazoles through Sequential C–H Couplings**

129.9, 130.2 (q,  $J_{\text{C-F}} = 31.6$  Hz), 131.2, 134.1, 135.7, 151.7; There is one overlapping carbon signal as 1 peak is missing even with prolonged scans. HRMS (DART)  $m/z = 306.0564$  calcd for  $\text{C}_{16}\text{H}_{11}\text{F}_3\text{NS}$   $[\text{M}+\text{H}]^+$ , found: 306.0565.

**Methyl-4-(4-phenylthiazol-5-yl)benzoate (12an)**

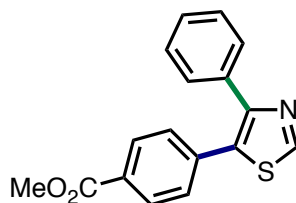

**12an**

The reaction was performed at 100 °C for 18 h. Purification by GPC gave **12an** as a light yellow oil (Method D: 49% yield).  $^1\text{H}$  NMR (600 MHz,  $\text{CDCl}_3$ )  $\delta$  3.92 (s, 3H), 7.29–7.33 (m, 3H), 7.43 (d,  $J = 8.2$  Hz, 2H), 7.48–7.52 (m, 2H), 7.99 (d,  $J = 8.2$  Hz, 2H), 8.86 (s, 1H);  $^{13}\text{C}$  NMR (150 MHz,  $\text{CDCl}_3$ )  $\delta$  52.2, 128.2, 128.4, 129.1, 129.6, 129.7, 130.0, 131.7, 134.2, 136.6, 151.7, 166.5; There is one overlapping carbon signal as 1 peak is missing even with prolonged scans. HRMS (DART)  $m/z = 296.0745$  calcd for  $\text{C}_{17}\text{H}_{14}\text{NO}_2\text{S}$   $[\text{M}+\text{H}]^+$ , found: 296.0746.

**4-(4-Methylphenyl)-5-phenylthiazole (12ba)**

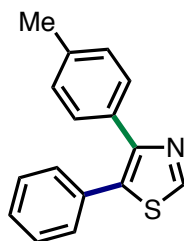

**12ba**

Purification by GPC gave **12ba** as a white solid (Method D: 77% yield).  $^1\text{H}$  NMR (600 MHz,  $\text{CDCl}_3$ )  $\delta$  2.34 (s, 3H), 7.10 (d,  $J = 7.6$  Hz, 2H), 7.30–7.40 (m, 5H), 7.42 (d,  $J = 7.6$  Hz, 2H), 8.80 (s, 1H);  $^{13}\text{C}$  NMR (150 MHz,  $\text{CDCl}_3$ )  $\delta$  21.2, 128.2, 128.7, 128.8, 129.0, 129.7, 131.8, 132.0, 132.3, 137.6, 150.7, 150.8; HRMS (DART)  $m/z = 252.0847$  calcd for  $\text{C}_{16}\text{H}_{14}\text{NS}$   $[\text{M}+\text{H}]^+$ , found: 252.0845.

**5-(4-Methoxyphenyl)-4-(4-methylphenyl)thiazole (12bg)**



**Supporting Information (Tani, Uehara, Yamaguchi, Itami)**  
**Programmed Synthesis of Arylthiazoles through Sequential C–H Couplings**

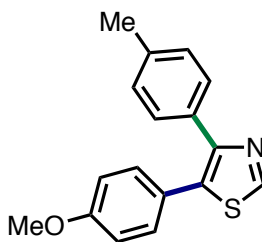

**12bg**

Purification by GPC gave **12bg** as a light yellow solid (Method D: 66% yield).  $^1\text{H}$  NMR (600 MHz,  $\text{CDCl}_3$ )  $\delta$  2.33 (s, 3H), 3.81 (s, 3H), 6.86 (d,  $J = 8.2$  Hz, 2H), 7.10 (d,  $J = 8.2$  Hz, 2H), 7.28 (d,  $J = 8.2$  Hz, 2H), 7.43 (d,  $J = 8.2$  Hz, 2H), 8.75 (s, 1H);  $^{13}\text{C}$  NMR (150 MHz,  $\text{CDCl}_3$ )  $\delta$  21.2, 55.2, 114.2, 124.1, 128.7, 129.0, 130.9, 131.9, 132.2, 137.4, 150.1, 150.3, 159.6; HRMS (DART)  $m/z = 282.0953$  calcd for  $\text{C}_{17}\text{H}_{16}\text{NOS}$   $[\text{M}+\text{H}]^+$ , found: 282.0954.

**5-(4-(Trifluoromethyl)phenyl)-4-(4-methylphenyl)thiazole (12bk)**

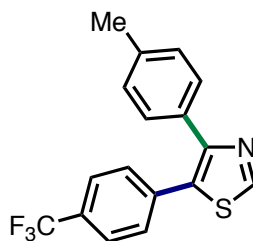

**12bk**

Purification by PTLC (hexane/EtOAc = 2:1) gave **12bk** as a yellow solid (Method D: 40% yield).  $^1\text{H}$  NMR (600 MHz,  $\text{CDCl}_3$ )  $\delta$  2.35 (s, 3H), 7.13 (d,  $J = 7.9$  Hz, 2H), 7.39 (d,  $J = 8.2$  Hz, 2H), 7.48 (d,  $J = 8.2$  Hz, 2H), 7.58 (d,  $J = 7.9$  Hz, 2H), 8.85 (s, 1H);  $^{13}\text{C}$  NMR (150 MHz,  $\text{CDCl}_3$ )  $\delta$  21.2, 123.9 (q,  $J_{\text{C-F}} = 270.2$  Hz), 125.7 (q,  $J_{\text{C-F}} = 2.9$  Hz), 128.9, 129.2, 129.9, 130.1 (q,  $J_{\text{C-F}} = 33.1$  Hz), 130.5, 131.3, 135.9, 138.2, 151.6, 151.9; HRMS (DART)  $m/z = 320.0721$  calcd for  $\text{C}_{17}\text{H}_{13}\text{F}_3\text{NS}$   $[\text{M}+\text{H}]^+$ , found: 320.0729.

**5-(4-Chlorophenyl)-4-(4-methylphenyl)thiazole (12bj)**

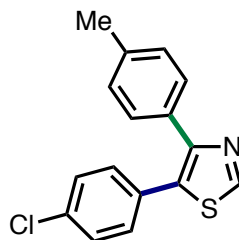

**12bj**

Purification by PTLC (hexane/EtOAc = 2:1) gave **12bj** as a yellow solid (Method D: 58% yield).  $^1\text{H}$  NMR (600 MHz,  $\text{CDCl}_3$ )  $\delta$  2.34 (s, 3H), 7.12 (d,  $J = 7.9$  Hz, 2H), 7.27–7.32 (m, 4H), 7.40 (d,  $J = 7.9$  Hz, 2H), 8.80 (s, 1H);  $^{13}\text{C}$  NMR (150 MHz,  $\text{CDCl}_3$ )  $\delta$  21.2, 128.8, 129.0, 129.1, 130.5, 130.89, 130.92, 131.4, 134.2, 137.9,



**Supporting Information (Tani, Uehara, Yamaguchi, Itami)**  
**Programmed Synthesis of Arylthiazoles through Sequential C–H Couplings**

151.08, 151.13; HRMS (DART)  $m/z$  = 286.0457 calcd for  $C_{16}H_{13}ClNS$   $[M+H]^+$ , found: 286.0460.

**4-(4-Methoxyphenyl)-5-phenylthiazole (12ga)<sup>[30]</sup>**

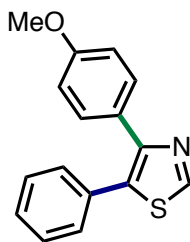

**12ga**

Purification by GPC gave **12ga** as a white solid (Method D: 81% yield).  $^1H$  NMR (600 MHz,  $CDCl_3$ )  $\delta$  3.80 (s, 3H), 6.82 (d,  $J$  = 8.9 Hz, 2H), 7.31–7.39 (m, 5H), 7.47 (d,  $J$  = 8.9 Hz, 2H), 8.78 (s, 1H);  $^{13}C$  NMR (150 MHz,  $CDCl_3$ )  $\delta$  55.2, 113.7, 127.2, 128.1, 128.7, 129.7, 130.2, 131.5, 132.1, 150.4, 150.8, 159.3; HRMS (DART)  $m/z$  = 268.0796 calcd for  $C_{16}H_{14}NOS$   $[M+H]^+$ , found: 268.0795.

**4-(4-Methoxyphenyl)-5-(4-methylphenyl)thiazole (12gb)**

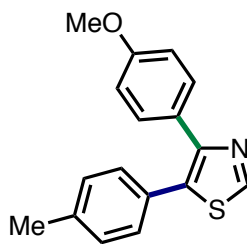

**12gb**

Purification by GPC gave **12gb** as a white solid (Method D: 78% yield).  $^1H$  NMR (600 MHz,  $CDCl_3$ )  $\delta$  2.35 (s, 3H), 3.79 (s, 3H), 6.82 (d,  $J$  = 8.2 Hz, 2H), 7.13 (d,  $J$  = 7.6 Hz, 2H), 7.25 (d,  $J$  = 8.2 Hz, 2H), 7.48 (d,  $J$  = 7.6 Hz, 2H), 8.75 (s, 1H);  $^{13}C$  NMR (150 MHz,  $CDCl_3$ )  $\delta$  21.2, 55.1, 113.7, 127.4, 129.0, 129.4, 129.5, 130.1, 131.7, 138.0, 150.0, 150.5, 159.2; HRMS (DART)  $m/z$  = 282.0953 calcd for  $C_{17}H_{16}NOS$   $[M+H]^+$ , found: 282.0952.

**5-(4-Methoxyphenyl)-4-(3,4,5-trimethoxyphenyl)thiazole (12gi)**

[30] Maeda, M.; Kojima, M. *J. Chem. Soc., Perkin Trans. 1*, **1978**, 685.



**Supporting Information (Tani, Uehara, Yamaguchi, Itami)**  
**Programmed Synthesis of Arylthiazoles through Sequential C–H Couplings**

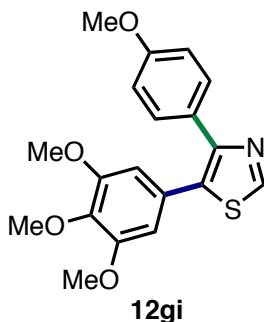

3,4,5-trimethoxybromobenzene (**2i**) was used and the reaction was performed at 100 °C for 36 h. Purification by GPC gave **12gi** as a light yellow oil (Method D: 55% yield). <sup>1</sup>H NMR (600 MHz, CDCl<sub>3</sub>) δ 3.73 (s, 6H), 3.81 (s, 3H), 3.88 (s, 3H), 6.57 (s, 2H), 6.85 (d, *J* = 8.9 Hz, 2H), 7.51 (d, *J* = 8.9 Hz, 2H), 8.77 (s, 1H); <sup>13</sup>C NMR (150 MHz, CDCl<sub>3</sub>) δ 55.2, 56.1, 60.9, 106.8, 113.6, 127.2, 127.3, 130.2, 131.5, 138.0, 150.3, 150.5, 153.3, 159.3; HRMS (DART) *m/z* = 358.1113 calcd for C<sub>19</sub>H<sub>20</sub>NO<sub>4</sub>S [M+H]<sup>+</sup>, found: 358.1113.

**4-(4-Chlorophenyl)-5-phenylthiazole (12ja)**

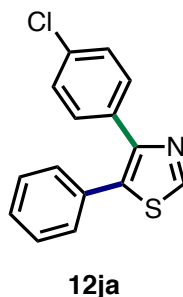

Purification by GPC gave **12ja** as a colorless oil (Method D: 80% yield). <sup>1</sup>H NMR (600 MHz, CDCl<sub>3</sub>) δ 7.25 (d, *J* = 8.9 Hz, 2H), 7.32–7.38 (m, 5H), 7.47 (d, *J* = 8.9 Hz, 2H), 8.80 (s, 1H); <sup>13</sup>C NMR (150 MHz, CDCl<sub>3</sub>) δ 128.5, 128.9, 129.7, 130.2, 131.5, 133.1, 133.4, 133.7, 149.4, 151.2; There is one overlapping carbon signal as 1 peak is missing even with prolonged scans. HRMS (DART) *m/z* = 272.0301 calcd for C<sub>15</sub>H<sub>11</sub>ClNS [M+H]<sup>+</sup>, found: 272.0303.

**5-(Benzo[d][1,3]dioxol-5-yl)-4-(4-chlorophenyl)thiazole (12jh)**

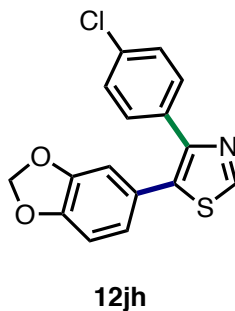

Purification by GPC gave **12jh** as a yellow solid (Method D: 35% yield). <sup>1</sup>H NMR (600 MHz, CDCl<sub>3</sub>) δ 6.00 (s, 2H), 6.78 (d, *J* = 1.4 Hz, 1H), 6.80 (d, *J* = 8.2 Hz, 1H), 6.84 (dd, *J* = 8.2, 1.4 Hz, 1H), 7.28 (d, *J* = 8.9 Hz,



**Supporting Information (Tani, Uehara, Yamaguchi, Itami)**  
**Programmed Synthesis of Arylthiazoles through Sequential C–H Couplings**

2H), 7.49 (d,  $J = 8.9$  Hz, 2H), 8.76 (s, 1H);  $^{13}\text{C}$  NMR (150 MHz,  $\text{CDCl}_3$ )  $\delta$  101.4, 108.8, 110.0, 123.7, 124.9, 128.6, 130.2, 133.0, 133.1, 133.7, 147.99, 148.02, 149.1, 150.8; HRMS (DART)  $m/z = 316.0199$  calcd for  $\text{C}_{16}\text{H}_{11}\text{ClNO}_2\text{S}$   $[\text{M}+\text{H}]^+$ , found: 316.0200.





**Supporting Information (Tani, Uehara, Yamaguchi, Itami)**  
**Programmed Synthesis of Arylthiazoles through Sequential C–H Couplings**

**9. Synthesis of Triarylthiazoles**

**Method H'**<sup>[24]</sup>

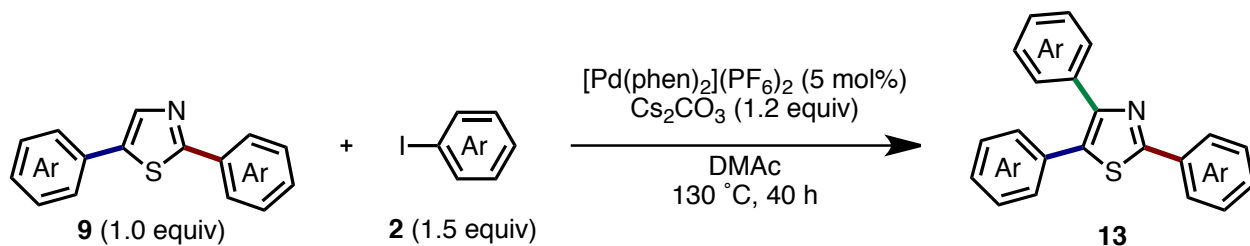

A 25-mL test tube equipped with screw cap, containing a magnetic stirring bar, was flame-dried under vacuum and then cooling to room temperature. To this vessel were added  $[\text{Pd}(\text{phen})_2](\text{PF}_6)_2$  (7.6 mg, 0.01 mmol, 5 mol%),  $\text{Cs}_2\text{CO}_3$  (78.2 mg, 0.24 mmol, 1.2 equiv), iodoarene **2** (0.3 mmol, 1.5 equiv), 2,5-diarylthiazole **9** (0.2 mmol, 1.0 equiv) and DMAc (0.8 mL) under argon atmosphere. The vessel was sealed and then stirred at 130 °C for 40 h. After cooling the reaction mixture to room temperature, the mixture was passed through a short silica gel pad (EtOAc). The filtrate was evaporated and the residue was purified by PTLC and/or GPC to afford triarylthiazole **13**.

**Method G**<sup>[23]</sup>

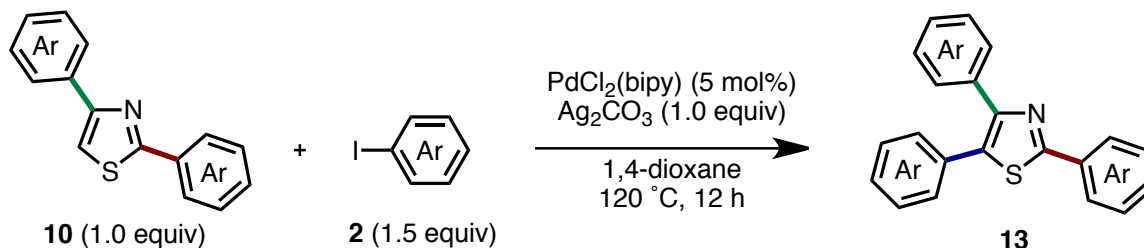

A 20-mL glass vessel equipped with J. Young® O-ring tap, containing a magnetic stirring bar, was flame-dried under vacuum and filled with argon after cooling to room temperature. To this vessel were added  $\text{PdCl}_2(\text{bipy})$  (4.2 mg, 0.013 mmol, 5 mol%),  $\text{Ag}_2\text{CO}_3$  (0.25 mmol, 68.9 mg, 1.0 equiv), iodoarene **2** (0.375 mmol, 1.5 equiv), 2,4-diarylthiazole **10** (0.25 mmol, 1.0 equiv) and 1,4-dioxane (1.0 mL) under a stream of argon. The vessel was sealed and then stirred at 120 °C for 12 h. After cooling the reaction mixture to room temperature, the mixture was passed through a short silica gel pad (EtOAc). The filtrate was evaporated and the residue was purified by PTLC, and/or GPC to afford triarylthiazole **13**.

**Method H''**<sup>[24]</sup>

**Supporting Information (Tani, Uehara, Yamaguchi, Itami)**  
**Programmed Synthesis of Arylthiazoles through Sequential C–H Couplings**

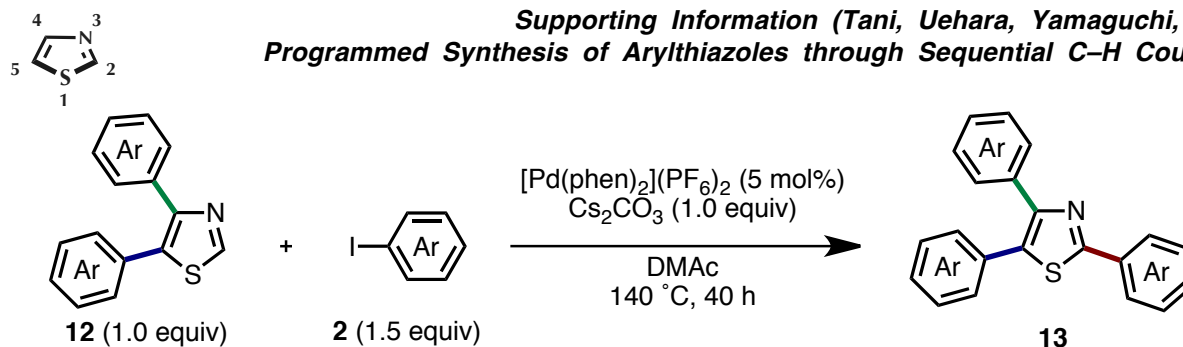

A 25-mL test tube equipped with screw cap, containing a magnetic stirring bar, was flame-dried under vacuum and then cooling to room temperature. To this vessel were added  $[\text{Pd}(\text{phen})_2](\text{PF}_6)_2$  (5.7 mg, 0.0075 mmol, 5 mol%),  $\text{Cs}_2\text{CO}_3$  (48.9 mg, 0.15 mmol, 1.0 equiv), iodoarene **2** (0.225 mmol, 1.5 equiv), 4,5-diarylthiazole **12** (0.15 mmol, 1.0 equiv) and DMAc (0.6 mL) under argon atmosphere. The vessel was sealed and then stirred at 140 °C for 40 h. After cooling the reaction mixture to room temperature, the mixture was passed through a short silica gel pad (EtOAc). The filtrate was evaporated and the residue was purified by PTLC and/or GPC to afford triarylthiazole **13**.

**Method I<sup>[8]</sup>**

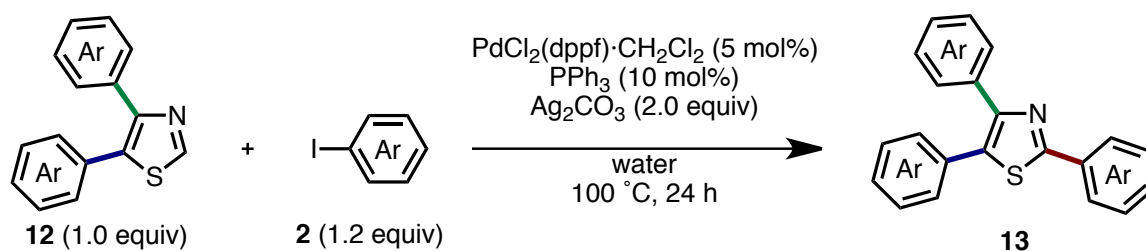

A 25-mL test tube equipped with screw cap, containing a magnetic stirring bar, were added  $\text{PdCl}_2(\text{dppf}) \cdot \text{CH}_2\text{Cl}_2$  (6.2 mg, 0.0075 mmol, 5 mol%),  $\text{PPh}_3$  (3.9 mg, 0.015 mol, 10 mol%),  $\text{Ag}_2\text{CO}_3$  (82.7 mg, 0.3 mmol, 2.0 equiv), iodoarene **2** (0.18 mmol, 1.2 equiv), 4,5-diarylthiazole **12** (0.15 mmol, 1.0 equiv) and distilled water (1 mL). The test tube was purged with argon and then stirred at 100 °C for 24 h. After cooling the reaction mixture to room temperature, the mixture was suspended in acetone (2.0 mL) and dichloromethane (5 mL), and then passed through a short silica gel pad (EtOAc). The filtrate was evaporated and the residue was purified by PTLC to afford triarylthiazole **13**.

**2,4,5-Triphenylthiazole (13aaa)<sup>[31]</sup>**

[31] Hodgetts, K. J.; Kershaw, M. T. *Org. Lett.* **2002**, *4*, 1363.



**Supporting Information (Tani, Uehara, Yamaguchi, Itami)**  
**Programmed Synthesis of Arylthiazoles through Sequential C–H Couplings**

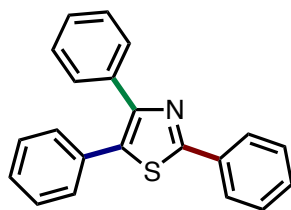

**13aaa**

Purification by PTLC (hexane/EtOAc = 20:1) gave **13aaa** as a white solid (Method H': 68% yield, Method G: 90% yield, Method I: 95% yield).  $^1\text{H}$  NMR (600 MHz,  $\text{CDCl}_3$ )  $\delta$  7.26–7.36 (m, 6H), 7.37–7.49 (m, 5H), 7.60 (d,  $J$  = 7.6 Hz, 2H) 8.02 (dd,  $J$  = 8.3, 1.4 Hz, 2H);  $^{13}\text{C}$  NMR (150 MHz,  $\text{CDCl}_3$ )  $\delta$  126.4, 127.8, 128.1, 128.3, 128.7, 128.9, 129.1, 129.6, 130.0, 132.1, 133.1, 133.6, 134.9, 150.8, 165.5; HRMS (DART)  $m/z$  = 314.1003 calcd for  $\text{C}_{21}\text{H}_{16}\text{NS}$   $[\text{M}+\text{H}]^+$ , found: 314.1006.

**5-(4-Methylphenyl)-2,4-diphenylthiazole (13aab)**

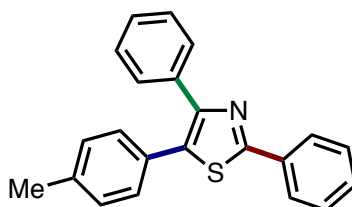

**13aab**

Purification by PTLC (hexane/EtOAc = 20:1) gave **13aab** as a white solid (Method G: 90% yield).  $^1\text{H}$  NMR (600 MHz,  $\text{CDCl}_3$ )  $\delta$  2.36 (s, 3H), 7.13 (d,  $J$  = 8.3 Hz, 2H), 7.26–7.33 (m, 5H), 7.38–7.46 (m, 3H), 7.61 (d,  $J$  = 8.2 Hz, 2H), 8.00 (dd,  $J$  = 8.3, 1.4 Hz, 2H);  $^{13}\text{C}$  NMR (150 MHz,  $\text{CDCl}_3$ )  $\delta$  21.3, 126.4, 127.7, 128.2, 128.9, 129.06, 129.09, 129.4, 129.9, 133.3, 133.7, 135.1, 138.1, 150.5, 165.1; There is one overlapping carbon signal as 1 peak is missing even with prolonged scans. HRMS (DART)  $m/z$  = 328.1160 calcd for  $\text{C}_{22}\text{H}_{18}\text{NS}$   $[\text{M}+\text{H}]^+$ , found: 328.1159.

**5-(4-Methoxyphenyl)-2,4-diphenylthiazole (13aag)**

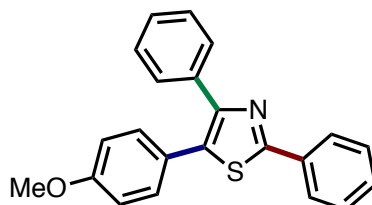

**13aag**

Purification by PTLC (hexane/EtOAc = 10:1) gave **13aag** as a white solid (Method G: 90% yield).  $^1\text{H}$  NMR (600 MHz,  $\text{CDCl}_3$ )  $\delta$  3.82 (s, 3H), 6.86 (d,  $J$  = 8.9 Hz, 2H), 7.26–7.33 (m, 5H), 7.39–7.46 (m, 3H), 7.61 (d,  $J$  = 8.3 Hz, 2H), 8.00 (dd,  $J$  = 8.3, 1.4 Hz, 2H);  $^{13}\text{C}$  NMR (150 MHz,  $\text{CDCl}_3$ )  $\delta$  55.3, 114.2, 124.3, 126.4, 127.7, 128.2, 128.9, 129.1, 129.8, 130.8, 133.0, 133.7, 135.1, 150.2, 159.6, 164.9; HRMS (DART)  $m/z$  = 344.1109 calcd for  $\text{C}_{22}\text{H}_{18}\text{NOS}$   $[\text{M}+\text{H}]^+$ , found: 344.1112.



**Supporting Information (Tani, Uehara, Yamaguchi, Itami)**  
**Programmed Synthesis of Arylthiazoles through Sequential C–H Couplings**

**5-(4-Chlorophenyl)-2,4-diphenylthiazole (13aa<sub>j</sub>)**

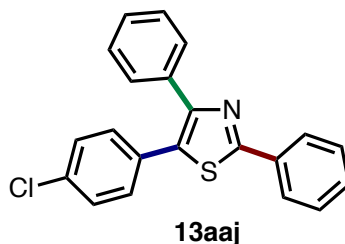

The reaction was performed for 22 h. Purification by PTLC (hexane/EtOAc = 20:1) gave **13aa<sub>j</sub>** as a white solid (Method G: 74% yield). <sup>1</sup>H NMR (600 MHz, CDCl<sub>3</sub>) δ 7.27–7.35 (m, 7H), 7.40–7.47 (m, 3H), 7.58 (dd, *J* = 8.2, 1.4 Hz, 2H), 8.00 (dd, *J* = 8.2, 1.4 Hz, 2H); <sup>13</sup>C NMR (150 MHz, CDCl<sub>3</sub>) δ 126.4, 128.0, 128.4, 128.9, 129.0, 129.1, 130.1, 130.6, 130.8, 131.6, 133.5, 134.1, 134.7, 151.2, 165.8; HRMS (DART) *m/z* = 348.0614 calcd for C<sub>21</sub>H<sub>15</sub>ClNS [M+H]<sup>+</sup>, found: 348.0613.

**Methyl 4-(2,4-diphenylthiazol-5-yl)benzoate (13aa<sub>n</sub>)**

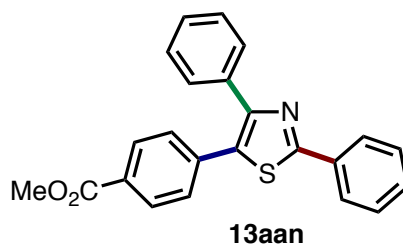

The reaction was performed at 140 °C for 22 h. Purification by PTLC (hexane/EtOAc = 5:1) gave **13aa<sub>n</sub>** as a light yellow solid (Method G: 71% yield). <sup>1</sup>H NMR (600 MHz, CDCl<sub>3</sub>) δ 3.90 (s, 3H), 7.28–7.33 (m, 3H), 7.39–7.46 (m, 5H), 7.54–7.59 (m, 2H), 7.97 (d, *J* = 8.3 Hz, 2H), 8.00 (dd, *J* = 6.9, 1.4 Hz, 2H); <sup>13</sup>C NMR (150 MHz, CDCl<sub>3</sub>) δ 52.1, 126.4, 128.2, 128.4, 128.9, 129.1, 129.4, 129.5, 129.9, 130.2, 131.7, 133.3, 134.6, 136.8, 151.8, 166.2, 166.5; HRMS (DART) *m/z* = 372.1058 calcd for C<sub>23</sub>H<sub>18</sub>NO<sub>2</sub>S [M+H]<sup>+</sup>, found: 372.1060.

**5-(4-Acetylphenyl)-2,4-diphenylthiazole (13aa<sub>o</sub>)**

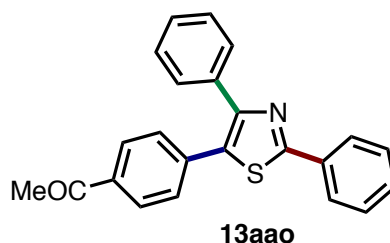

The reaction was performed at 140 °C for 22 h. Purification by PTLC (hexane/EtOAc = 3:1) gave **13aa<sub>o</sub>** as a light yellow solid (Method G: 51% yield). <sup>1</sup>H NMR (600 MHz, CDCl<sub>3</sub>) δ 2.60 (s, 3H), 7.31–7.35 (m, 3H), 7.43–7.49 (m, 5H), 7.57 (dd, *J* = 6.9, 2.8 Hz, 2H), 7.90 (d, *J* = 8.3 Hz, 2H), 8.02 (dd, *J* = 7.6, 1.4 Hz, 2H); <sup>13</sup>C NMR (150 MHz, CDCl<sub>3</sub>) δ 26.6, 126.5, 128.2, 128.4, 128.7, 128.9, 129.2, 129.6, 130.3, 131.6, 133.3,



**Supporting Information (Tani, Uehara, Yamaguchi, Itami)**  
**Programmed Synthesis of Arylthiazoles through Sequential C–H Couplings**

134.6, 136.3, 137.0, 152.0, 166.4, 197.3; HRMS (DART)  $m/z$  = 356.1109 calcd for  $C_{23}H_{18}NOS$   $[M+H]^+$ , found: 356.1108.

**5-(4-Pyridyl)-2,4-diphenylthiazole (13aau)**

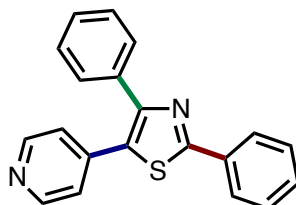

**13aau**

The reaction was performed at 140 °C for 22 h. Purification by PTLC (hexane/EtOAc = 2:1) gave **13aau** as light yellow solid (Method G: 69% yield).  $^1H$  NMR (600 MHz,  $CDCl_3$ )  $\delta$  7.25 (dd,  $J$  = 4.8, 1.4 Hz, 2H), 7.33–7.38 (m, 3H), 7.43–7.48 (m, 3H), 7.57 (dd,  $J$  = 6.9, 2.8 Hz, 2H), 8.01 (dd,  $J$  = 7.6, 1.5 Hz, 2H), 8.54 (dd,  $J$  = 4.8, 1.4 Hz, 2H);  $^{13}C$  NMR (150 MHz,  $CDCl_3$ )  $\delta$  123.5, 126.5, 128.5, 128.9, 129.2, 129.7, 130.5, 133.1, 134.3, 140.0, 150.2, 152.9, 166.9; There is one overlapping carbon signal as 1 peak is missing even with prolonged scans. HRMS (DART)  $m/z$  = 315.0956 calcd for  $C_{20}H_{15}N_2S$   $[M+H]^+$ , found: 315.0955.

**4-(4-Methylphenyl)-2,5-diphenylthiazole (13aba)**

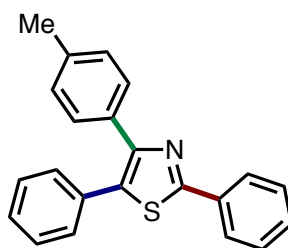

**13aba**

Purification by PTLC (hexane/EtOAc = 20:1) gave **13aba** as a white solid (Method H': 64% yield).  $^1H$  NMR (600 MHz,  $CDCl_3$ )  $\delta$  2.34 (s, 3H), 7.11 (d,  $J$  = 8.3 Hz, 2H), 7.30–7.36 (m, 3H), 7.38–7.47 (m, 5H), 7.49 (d,  $J$  = 8.2 Hz, 2H), 8.01 (d,  $J$  = 6.9 Hz, 2H);  $^{13}C$  NMR (150 MHz,  $CDCl_3$ )  $\delta$  21.3, 126.4, 128.0, 128.7, 128.85, 128.95, 129.0, 129.6, 129.9, 132.1, 132.2, 132.4, 133.7, 137.6, 150.8, 165.3; HRMS (DART)  $m/z$  = 328.1160 calcd for  $C_{22}H_{18}NS$   $[M+H]^+$ , found: 328.1156.

**5-(4-Methoxyphenyl)-4-(4-methylphenyl)-2-phenylthiazole (13abg)**

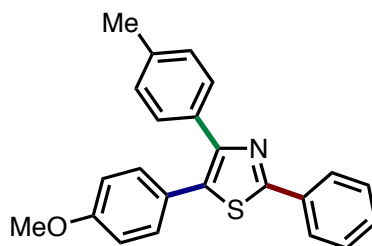

**13abg**



**Supporting Information (Tani, Uehara, Yamaguchi, Itami)**  
**Programmed Synthesis of Arylthiazoles through Sequential C–H Couplings**

Purification by PTLC (hexane/EtOAc = 10:1) gave **13abg** as a white solid (Method G: 91% yield).  $^1\text{H}$  NMR (600 MHz,  $\text{CDCl}_3$ )  $\delta$  2.33 (s, 3H), 3.80 (s, 3H), 6.84 (d,  $J$  = 8.3 Hz, 2H), 7.11 (d,  $J$  = 7.6 Hz, 2H), 7.31 (d,  $J$  = 8.9 Hz, 2H), 7.36–7.44 (m, 3H), 7.50 (d,  $J$  = 8.3 Hz, 2H), 7.99 (d,  $J$  = 6.8 Hz, 2H);  $^{13}\text{C}$  NMR (150 MHz,  $\text{CDCl}_3$ )  $\delta$  21.3, 55.2, 114.1, 124.4, 126.3, 128.8, 128.88, 128.94, 129.7, 130.8, 132.2, 132.4, 133.7, 137.4, 150.3, 159.5, 164.7; HRMS (DART)  $m/z$  = 358.1266 calcd for  $\text{C}_{23}\text{H}_{20}\text{NOS}$   $[\text{M}+\text{H}]^+$ , found: 358.1269.

**4-(4-Methoxyphenyl)-2,5-diphenylthiazole (13aga)**

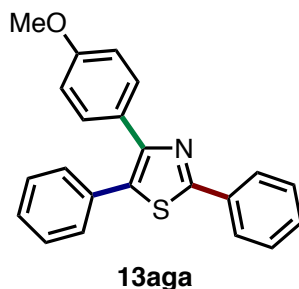

$[\text{Pd}(\text{phen})_2](\text{PF}_6)_2$  (10 mol%) and  $\text{Cs}_2\text{CO}_3$  (1.5 equiv) were used and the reaction was performed at  $150^\circ\text{C}$  for 18 h. Purification by PTLC (hexane/EtOAc = 10:1) gave **13aga** as a white solid (Method H': 42% yield).  $^1\text{H}$  NMR (600 MHz,  $\text{CDCl}_3$ )  $\delta$  3.81 (s, 3H), 6.84 (d,  $J$  = 8.9 Hz, 2H), 7.30–7.37 (m, 3H), 7.39–7.50 (m, 5H), 7.54 (d,  $J$  = 8.3 Hz, 2H), 8.01 (d,  $J$  = 6.2 Hz, 2H);  $^{13}\text{C}$  NMR (150 MHz,  $\text{CDCl}_3$ )  $\delta$  55.2, 113.7, 126.4, 127.6, 128.0, 128.7, 128.9, 129.6, 129.9, 130.3, 131.8, 132.3, 133.7, 150.6, 159.2, 165.3; HRMS (DART)  $m/z$  = 344.1109 calcd for  $\text{C}_{22}\text{H}_{18}\text{NOS}$   $[\text{M}+\text{H}]^+$ , found: 344.1107.

**4-(4-Methoxyphenyl)-5-(4-methylphenyl)-2-phenylthiazole (13agb)**

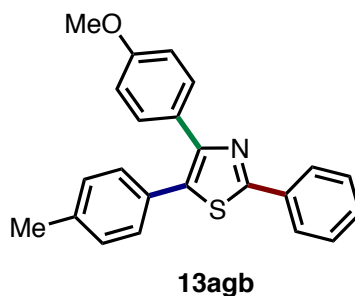

Purification by PTLC (hexane/EtOAc = 10:1) gave **13agb** as a white solid (Method H': 43% yield).  $^1\text{H}$  NMR (600 MHz,  $\text{CDCl}_3$ )  $\delta$  2.37 (s, 3H), 3.81 (s, 3H), 6.84 (d,  $J$  = 8.9 Hz, 2H), 7.14 (d,  $J$  = 7.6 Hz, 2H), 7.29 (d,  $J$  = 7.6 Hz, 2H), 7.39–7.47 (m, 3H), 7.55 (d,  $J$  = 8.9 Hz, 2H), 8.00 (d,  $J$  = 7.6 Hz, 2H);  $^{13}\text{C}$  NMR (150 MHz,  $\text{CDCl}_3$ )  $\delta$  21.3, 55.2, 113.6, 126.3, 127.7, 128.8, 129.3, 129.40, 129.43, 129.8, 130.3, 132.0, 133.7, 138.0, 150.2, 159.2, 164.9; HRMS (DART)  $m/z$  = 358.1266 calcd for  $\text{C}_{23}\text{H}_{20}\text{NOS}$   $[\text{M}+\text{H}]^+$ , found: 358.1265.

**5-(Benzo[*d*][1,3]dioxol-5-yl)-4-(4-chlorophenyl)-2-phenylthiazole (13ajh)**



**Supporting Information (Tani, Uehara, Yamaguchi, Itami)**  
**Programmed Synthesis of Arylthiazoles through Sequential C–H Couplings**

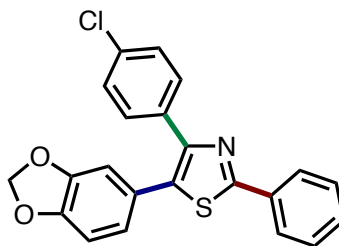

**13ajh**

Purification by PTLC (hexane/EtOAc 10:1) gave **13ajh** as a white solid (Method G: 87% yield).  $^1\text{H}$  NMR (600 MHz,  $\text{CDCl}_3$ )  $\delta$  5.99 (s, 2H), 6.77–6.84 (m, 2H), 6.87 (dd,  $J = 7.6, 1.4$  Hz, 1H), 7.28 (d,  $J = 8.9$  Hz, 2H), 7.40–7.47 (m, 3H), 7.56 (d,  $J = 8.9$  Hz, 2H), 7.97 (dd,  $J = 8.3, 1.4$  Hz, 2H);  $^{13}\text{C}$  NMR (150 MHz,  $\text{CDCl}_3$ )  $\delta$  101.4, 108.7, 109.8, 123.5, 125.2, 126.3, 128.5, 128.9, 130.0, 130.3, 133.2, 133.3, 133.4, 133.6, 147.86, 147.94, 149.1, 165.2; HRMS (DART)  $m/z = 392.0512$  calcd for  $\text{C}_{22}\text{H}_{15}\text{ClNO}_2\text{S}$   $[\text{M}+\text{H}]^+$ , found: 392.0516.

**2,5-Diphenyl-4-(4-(trifluoromethyl)phenyl)thiazole (13aka)**

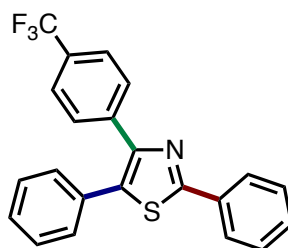

**13aka**

$[\text{Pd}(\text{phen})_2](\text{PF}_6)_2$  (10 mol%) and  $\text{Cs}_2\text{CO}_3$  (1.5 equiv) were used and the reaction was performed at  $150^\circ\text{C}$  for 18 h. Purification by PTLC (hexane/EtOAc = 20:1) and GPC gave **13aka** as a white solid (Method H': 54% yield).  $^1\text{H}$  NMR (600 MHz,  $\text{CDCl}_3$ )  $\delta$  7.35–7.43 (m, 5H), 7.44–7.52 (m, 3H), 7.55 (d,  $J = 8.3$  Hz, 2H), 7.73 (d,  $J = 8.3$  Hz, 2H), 8.01 (dd,  $J = 7.9, 1.4$  Hz, 2H);  $^{13}\text{C}$  NMR (150 MHz,  $\text{CDCl}_3$ )  $\delta$  124.2 (q,  $J_{\text{C-F}} = 270.2$  Hz), 125.2 (q,  $J_{\text{C-F}} = 4.3$  Hz), 126.4, 128.6, 129.0, 129.3, 129.58 (q,  $J_{\text{C-F}} = 33.1$  Hz), 129.61, 130.2, 131.5, 133.3, 134.6, 138.4, 149.1, 166.0; There is one overlapping carbon signal as 1 peak is missing even with prolonged scans. HRMS (DART)  $m/z = 382.0877$  calcd for  $\text{C}_{22}\text{H}_{15}\text{F}_3\text{NS}$   $[\text{M}+\text{H}]^+$ , found: 382.0878.

**2-(4-Methylphenyl)-4,5-diphenylthiazole (13baa)**

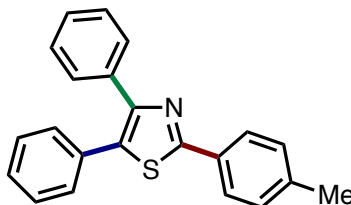

**13baa**

Purification by PTLC (hexane/EtOAc 20:1) gave **13baa** as white solid (Method H': 76% yield).  $^1\text{H}$  NMR (600 MHz,  $\text{CDCl}_3$ )  $\delta$  2.39 (s, 3H), 7.24 (d,  $J = 7.6$  Hz, 2H), 7.27–7.34 (m, 6H), 7.36–7.40 (m, 2H), 7.60 (dd,



**Supporting Information (Tani, Uehara, Yamaguchi, Itami)**  
**Programmed Synthesis of Arylthiazoles through Sequential C–H Couplings**

$J = 7.6, 1.4$  Hz, 2H), 7.90 (d,  $J = 8.3$  Hz, 2H);  $^{13}\text{C}$  NMR (150 MHz,  $\text{CDCl}_3$ )  $\delta$  21.4, 126.3, 127.7, 128.0, 128.2, 128.7, 129.1, 129.5, 130.9, 132.1, 132.5, 135.0, 140.2, 150.6, 165.6; There is one overlapping carbon signal as 1 peak is missing even with prolonged scans. HRMS (DART)  $m/z = 328.1160$  calcd for  $\text{C}_{22}\text{H}_{18}\text{NS}$   $[\text{M}+\text{H}]^+$ , found: 328.1158.

**5-(4-Methoxyphenyl)-2-(4-methylphenyl)-4-phenylthiazole (13bag)**

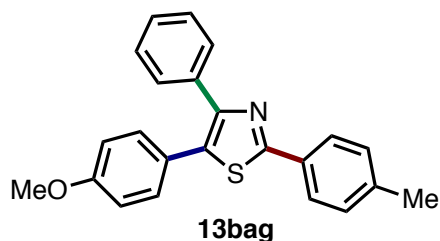

Purification by PTLC (hexane/EtOAc = 10:1) gave **13bag** as a white solid (Method G: 89% yield).  $^1\text{H}$  NMR (600 MHz,  $\text{CDCl}_3$ )  $\delta$  2.38 (s, 3H), 3.80 (s, 3H), 6.84 (d,  $J = 8.9$  Hz, 2H), 7.23 (d,  $J = 8.3$  Hz, 2H), 7.25–7.32 (m, 5H), 7.61 (d,  $J = 6.8$  Hz, 2H), 7.89 (d,  $J = 8.3$  Hz, 2H);  $^{13}\text{C}$  NMR (150 MHz,  $\text{CDCl}_3$ )  $\delta$  21.4, 55.2, 114.1, 124.3, 126.3, 127.6, 128.2, 129.0, 129.5, 130.8, 131.1, 132.5, 135.2, 140.0, 150.0, 159.5, 165.0; HRMS (DART)  $m/z = 358.1266$  calcd for  $\text{C}_{23}\text{H}_{20}\text{NOS}$   $[\text{M}+\text{H}]^+$ , found: 358.1264.

**2-(4-Methylphenyl)-4-phenyl-5-(4-(trifluoromethyl)phenyl)thiazole (13bak)**

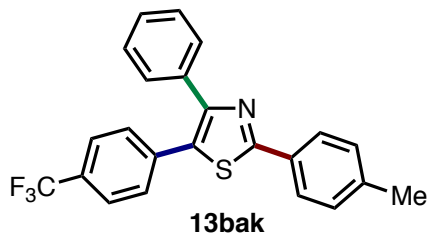

Purification by PTLC (hexane/EtOAc = 10:1) gave **13bak** as a white solid (Method G: 63% yield).  $^1\text{H}$  NMR (600 MHz,  $\text{CDCl}_3$ )  $\delta$  2.40 (s, 3H), 7.26 (d,  $J = 8.2$  Hz, 2H), 7.30–7.36 (m, 3H), 7.48 (d,  $J = 8.2$  Hz, 2H), 7.56 (d,  $J = 8.2$  Hz, 4H), 7.90 (d,  $J = 8.3$  Hz, 2H);  $^{13}\text{C}$  NMR (150 MHz,  $\text{CDCl}_3$ )  $\delta$  21.5, 124.0 (q,  $J_{\text{C-F}} = 270.2$  Hz), 125.6 (q,  $J_{\text{C-F}} = 4.3$  Hz), 126.4, 128.2, 128.5, 129.2, 129.6, 129.7, 129.8 (q,  $J_{\text{C-F}} = 31.6$  Hz), 130.6, 130.7, 134.6, 136.0, 140.6, 151.8, 166.6; HRMS (DART)  $m/z = 396.1034$  calcd for  $\text{C}_{23}\text{H}_{17}\text{F}_3\text{NS}$   $[\text{M}+\text{H}]^+$ , found: 396.1036.

**5-(4-Nitrophenyl)-2-(4-methylphenyl)-4-phenylthiazole (13baq)**





**Supporting Information (Tani, Uehara, Yamaguchi, Itami)**  
**Programmed Synthesis of Arylthiazoles through Sequential C–H Couplings**

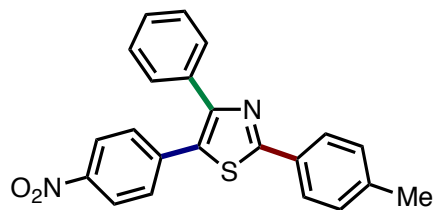

**13baq**

Purification by PTLC (hexane/EtOAc 5:1) and GPC gave **13baq** as a yellow solid (Method G: 61% yield).  $^1\text{H}$  NMR (600 MHz,  $\text{CDCl}_3$ )  $\delta$  2.41 (s, 3H), 7.27 (d,  $J = 8.2$  Hz, 2H), 7.33–7.37 (m, 3H), 7.51 (d,  $J = 8.9$  Hz, 2H), 7.55 (dd,  $J = 7.6, 2.0$  Hz, 2H), 7.91 (d,  $J = 7.6$  Hz, 2H), 8.15 (d,  $J = 8.9$  Hz, 2H);  $^{13}\text{C}$  NMR (150 MHz,  $\text{CDCl}_3$ )  $\delta$  21.5, 124.0, 126.5, 128.56, 128.62, 129.2, 129.7, 130.0, 130.4, 134.3, 139.1, 141.0, 147.0, 152.8, 167.3; There is one overlapping carbon signal as 1 peak is missing even with prolonged scans. HRMS (DART)  $m/z = 373.1011$  calcd for  $\text{C}_{22}\text{H}_{17}\text{N}_2\text{O}_2\text{S}$   $[\text{M}+\text{H}]^+$ , found: 373.1011.

**4-(4-Methoxyphenyl)-2-(4-methylphenyl)-5-phenylthiazole (13bga)**

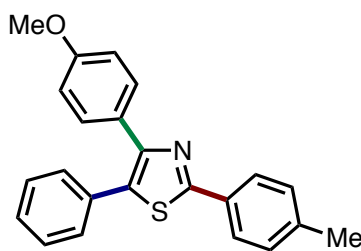

**13bga**

Purification by PTLC (hexane/EtOAc = 10:1) gave **13bga** as a white solid (Method H': 37% yield).  $^1\text{H}$  NMR (600 MHz,  $\text{CDCl}_3$ )  $\delta$  2.40 (s, 3H), 3.81 (s, 3H), 6.84 (d,  $J = 8.9$  Hz, 2H), 7.25 (d,  $J = 7.6$  Hz, 2H), 7.30–7.36 (m, 3H), 7.39 (dd,  $J = 7.6, 1.4$  Hz, 2H), 7.53 (d,  $J = 8.9$  Hz, 2H), 7.90 (d,  $J = 8.3$  Hz, 2H);  $^{13}\text{C}$  NMR (150 MHz,  $\text{CDCl}_3$ )  $\delta$  21.4, 55.2, 113.7, 126.3, 127.7, 127.9, 128.7, 129.5, 129.6, 130.3, 131.0, 131.2, 132.4, 140.1, 150.4, 159.2, 165.4; HRMS (DART)  $m/z = 358.1266$  calcd for  $\text{C}_{23}\text{H}_{20}\text{NO}$   $[\text{M}+\text{H}]^+$ , found: 358.1267.

**4-(4-Chlorophenyl)-5-(4-methoxyphenyl)-2-(4-methylphenyl)thiazole (13bjg)**

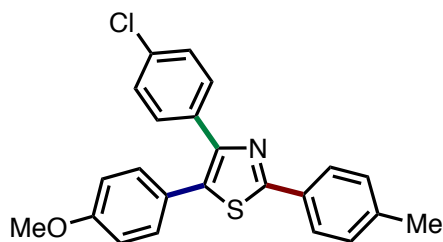

**13bjg**

Purification by GPC gave **13bjg** as a white solid (Method H': 64% yield).  $^1\text{H}$  NMR (600 MHz,  $\text{CDCl}_3$ )  $\delta$  2.39 (s, 3H), 3.82 (s, 3H), 6.86 (dd,  $J = 8.6, 1.4$  Hz, 2H), 7.17–7.30 (m, 6H), 7.54 (dd,  $J = 8.3, 2.0$  Hz, 2H),

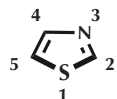

**Supporting Information (Tani, Uehara, Yamaguchi, Itami)**  
**Programmed Synthesis of Arylthiazoles through Sequential C–H Couplings**

7.87 (dd,  $J = 7.9, 1.4$  Hz, 2H);  $^{13}\text{C}$  NMR (150 MHz,  $\text{CDCl}_3$ )  $\delta$  21.4, 55.3, 114.3, 123.9, 126.2, 128.4, 129.6, 130.3, 130.8, 130.9, 132.9, 133.4, 133.6, 140.2, 148.7, 159.6, 165.3; HRMS (DART)  $m/z$  = calcd 392.0876 for  $\text{C}_{23}\text{H}_{19}\text{ClNOS}$   $[\text{M}+\text{H}]^+$ , found: 392.0880.

**Methyl 4-(4-(4-chlorophenyl)-2-(4-methylphenyl)thiazol-5-yl)benzoate (13bjn)**

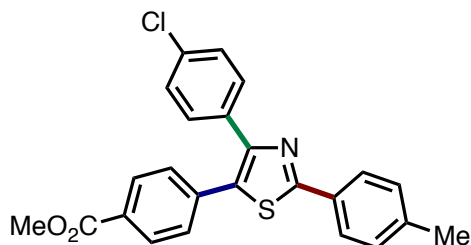

**13bjn**

Purification by GPC gave **13bjn** as a light yellow solid (Method G: 51% yield).  $^1\text{H}$  NMR (600 MHz,  $\text{CDCl}_3$ )  $\delta$  2.40 (s, 3H), 3.93 (s, 3H), 7.26 (d,  $J = 7.6$  Hz, 2H), 7.29 (d,  $J = 8.3$  Hz, 2H), 7.43 (d,  $J = 8.2$  Hz, 2H), 7.51 (d,  $J = 8.3$  Hz, 2H), 7.89 (d,  $J = 7.9$  Hz, 2H), 8.00 (d,  $J = 8.3$  Hz, 2H);  $^{13}\text{C}$  NMR (150 MHz,  $\text{CDCl}_3$ )  $\delta$  21.4, 52.2, 126.4, 128.6, 129.4, 129.6, 129.7, 130.0, 130.4, 130.6, 131.5, 133.1, 134.0, 136.6, 140.7, 150.3, 166.4, 166.7; HRMS (DART)  $m/z$  = calcd 420.0825 for  $\text{C}_{24}\text{H}_{19}\text{ClNO}_2\text{S}$   $[\text{M}+\text{H}]^+$ , found: 420.0825.

**2-(4-Methylphenyl)-5-phenyl-4-(3-pyridyl)thiazole (13bta)**

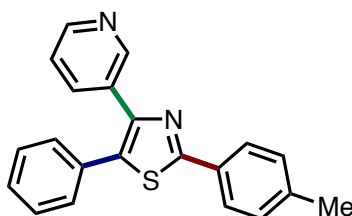

**13bta**

$[\text{Pd}(\text{phen})_2](\text{PF}_6)_2$  (10 mol%) and  $\text{Cs}_2\text{CO}_3$  (1.5 equiv) were used and the reaction was performed at  $150^\circ\text{C}$  for 18 h. Purification by PTLC (hexane/EtOAc = 2:1) gave **13bta** as a light yellow solid (Method H': 28% yield).  $^1\text{H}$  NMR (600 MHz,  $\text{CDCl}_3$ )  $\delta$  2.42 (s, 3H), 7.24 (dd,  $J = 7.9, 4.8$  Hz, 1H), 7.27 (d,  $J = 7.9$  Hz, 2H), 7.33–7.40 (m, 5H), 7.88–7.94 (m, 3H), 8.52 (dd,  $J = 4.8, 1.4$  Hz, 1H), 8.83 (d,  $J = 1.4$  Hz, 1H);  $^{13}\text{C}$  NMR (150 MHz,  $\text{CDCl}_3$ )  $\delta$  21.5, 123.1, 126.3, 128.6, 129.0, 129.5, 129.7, 130.7, 131.0, 131.4, 134.0, 136.2, 140.6, 147.4, 148.6, 150.0, 166.5; HRMS (DART)  $m/z$  = 329.1112 calcd for  $\text{C}_{21}\text{H}_{17}\text{N}_2\text{S}$   $[\text{M}+\text{H}]^+$ , found: 329.1110.

**2-(4-Methoxyphenyl)-4,5-diphenylthiazole (13gaa)**



**Supporting Information (Tani, Uehara, Yamaguchi, Itami)**  
**Programmed Synthesis of Arylthiazoles through Sequential C–H Couplings**

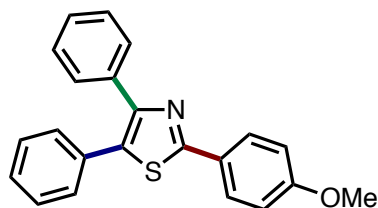

**13gaa**

Purification by PTLC (hexane/EtOAc = 10:1) gave **13gaa** as a white solid (Method H'': 68% yield).  $^1\text{H}$  NMR (600 MHz,  $\text{CDCl}_3$ )  $\delta$  3.85 (s, 3H), 6.96 (d,  $J$  = 8.9 Hz, 2H), 7.26–7.34 (m, 6H), 7.36–7.40 (m, 2H), 7.59 (dd,  $J$  = 7.6, 1.4 Hz, 2H), 7.95 (d,  $J$  = 8.9 Hz, 2H);  $^{13}\text{C}$  NMR (150 MHz,  $\text{CDCl}_3$ )  $\delta$  55.4, 114.2, 126.6, 127.7, 127.9, 128.0, 128.2, 128.7, 129.1, 129.5, 132.1, 132.2, 135.0, 150.5, 161.1, 165.4; HRMS (DART)  $m/z$  = 344.1109 calcd for  $\text{C}_{22}\text{H}_{18}\text{NOS}$   $[\text{M}+\text{H}]^+$ , found: 344.1106.

**2-(4-Methoxyphenyl)-5-(4-methylphenyl)-4-phenylthiazole (13gab)**

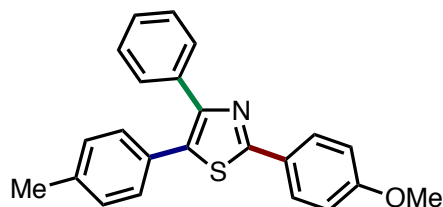

**13gab**

Purification by PTLC (hexane/EtOAc = 10:1) gave **13gab** as a white solid (Method H'': 79% yield).  $^1\text{H}$  NMR (600 MHz,  $\text{CDCl}_3$ )  $\delta$  2.35 (s, 3H), 3.85 (s, 3H), 6.95 (d,  $J$  = 8.9 Hz, 2H), 7.12 (d,  $J$  = 8.3 Hz, 2H), 7.25–7.32 (m, 5H), 7.60 (d,  $J$  = 6.9 Hz, 2H), 7.94 (d,  $J$  = 8.9 Hz, 2H);  $^{13}\text{C}$  NMR (150 MHz,  $\text{CDCl}_3$ )  $\delta$  21.3, 55.4, 114.2, 126.6, 127.6, 127.8, 128.2, 129.1, 129.2, 129.4, 132.3, 135.2, 137.9, 150.1, 161.0, 165.0; There is one overlapping carbon signal as 1 peak is missing even with prolonged scans. HRMS (DART)  $m/z$  = 358.1266 calcd for  $\text{C}_{23}\text{H}_{20}\text{NOS}$   $[\text{M}+\text{H}]^+$ , found: 358.1267.

**2-(4-Methoxyphenyl)-4-phenyl-5-(4-(trifluoromethyl)phenyl)thiazole (13gak)**

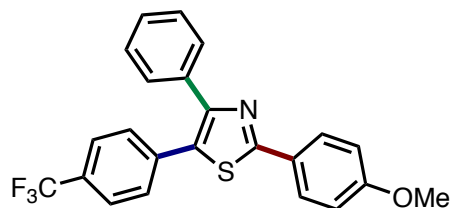

**13gak**

$[\text{Pd}(\text{phen})_2](\text{PF}_6)_2$  (10 mol%) and  $\text{Cs}_2\text{CO}_3$  (1.5 equiv) were used and the reaction was performed at  $150^\circ\text{C}$  for 18 h. Purification by PTLC (hexane/EtOAc = 10:1) gave **13gak** as a light yellow solid (Method H': 54% yield).  $^1\text{H}$  NMR (600 MHz,  $\text{CDCl}_3$ )  $\delta$  3.87 (s, 3H), 6.97 (d,  $J$  = 8.6 Hz, 2H), 7.31–7.36 (m, 3H), 7.48 (d,  $J$  = 8.2 Hz, 2H), 7.56 (d,  $J$  = 7.9 Hz, 4H), 7.95 (d,  $J$  = 8.6 Hz, 2H);  $^{13}\text{C}$  NMR (150 MHz,  $\text{CDCl}_3$ )  $\delta$  55.4, 114.3, 124.0 (q,  $J_{\text{C-F}}$  = 271.7 Hz), 125.6 (q,  $J_{\text{C-F}}$  = 4.3 Hz), 126.3, 128.0, 128.2, 128.5, 129.2, 129.7, 129.8 (q,



**Supporting Information (Tani, Uehara, Yamaguchi, Itami)**  
**Programmed Synthesis of Arylthiazoles through Sequential C–H Couplings**

$J_{\text{C-F}} = 31.6$  Hz), 130.2, 134.7, 136.1, 151.7, 161.4, 166.3; HRMS (DART)  $m/z = 412.0983$  calcd for  $\text{C}_{23}\text{H}_{17}\text{F}_3\text{NOS}$   $[\text{M}+\text{H}]^+$ , found: 412.0994.

**2-(4-Methoxyphenyl)-4-(4-methylphenyl)-5-phenylthiazole (13gba)**

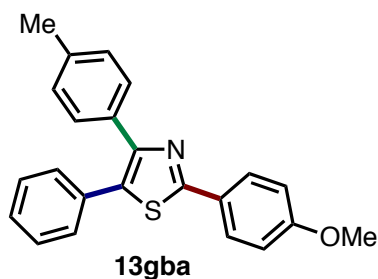

Purification by PTLC (hexane/EtOAc = 10:1) gave **13gba** as a white solid (Method G: 86% yield).  $^1\text{H}$  NMR (600 MHz,  $\text{CDCl}_3$ )  $\delta$  2.33 (s, 3H), 3.83 (s, 3H), 6.94 (d,  $J = 8.9$  Hz, 2H), 7.10 (d,  $J = 8.3$  Hz, 2H), 7.27–7.33 (m, 3H), 7.38 (dd,  $J = 7.6, 1.4$  Hz, 2H), 7.48 (d,  $J = 7.6$  Hz, 2H), 7.94 (d,  $J = 8.2$  Hz, 2H);  $^{13}\text{C}$  NMR (150 MHz,  $\text{CDCl}_3$ )  $\delta$  21.2, 55.3, 114.2, 126.7, 127.8, 128.6, 128.92, 128.94, 129.5, 131.4, 132.2, 132.4, 137.5, 150.5, 161.1, 165.2; There is one overlapping carbon signal as 1 peak is missing even with prolonged scans. HRMS (DART)  $m/z = 358.1266$  calcd for  $\text{C}_{23}\text{H}_{20}\text{NOS}$   $[\text{M}+\text{H}]^+$ , found: 358.1265.

**2-(4-Methoxyphenyl)-4-(4-methylphenyl)-5-(4-(trifluoromethyl)phenyl)thiazole (13gbk)**

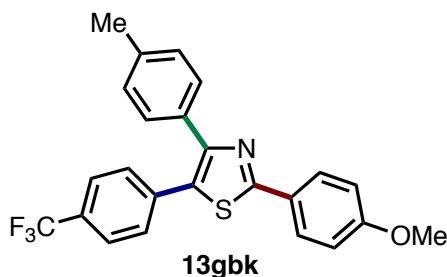

Purification by PTLC (hexane/EtOAc = 10:1) gave **13gbk** as a white solid (Method G: 88% yield).  $^1\text{H}$  NMR (600 MHz,  $\text{CDCl}_3$ )  $\delta$  2.35 (s, 3H), 3.84 (s, 3H), 6.94 (d,  $J = 8.3$  Hz, 2H), 7.13 (d,  $J = 8.2$  Hz, 2H), 7.44 (d,  $J = 8.2$  Hz, 2H), 7.46 (d,  $J = 8.2$  Hz, 2H), 7.54 (d,  $J = 8.2$  Hz, 2H), 7.93 (d,  $J = 8.2$  Hz, 2H);  $^{13}\text{C}$  NMR (150 MHz,  $\text{CDCl}_3$ )  $\delta$  21.3, 55.4, 114.2, 124.0 (q,  $J_{\text{C-F}} = 271.7$  Hz), 125.6 (q,  $J_{\text{C-F}} = 2.9$  Hz), 126.3, 128.0, 129.0, 129.2, 129.55, 129.61 (q,  $J_{\text{C-F}} = 31.7$  Hz), 129.64, 131.7, 136.2, 138.0, 151.7, 161.3, 166.1; HRMS (DART)  $m/z = 426.1139$  calcd for  $\text{C}_{24}\text{H}_{19}\text{F}_3\text{NOS}$   $[\text{M}+\text{H}]^+$ , found: 426.1135.

**2-(4-Methoxyphenyl)-4-(3,5-dimethylphenyl)-5-(4-(trifluoromethyl)phenyl)thiazole (13gek)**



**Supporting Information (Tani, Uehara, Yamaguchi, Itami)**  
**Programmed Synthesis of Arylthiazoles through Sequential C–H Couplings**

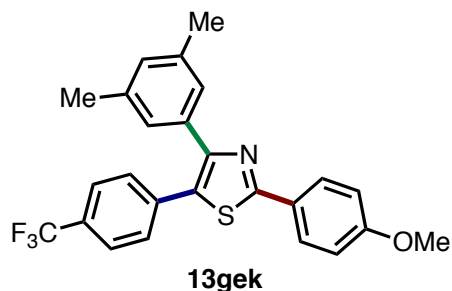

Purification by PTLC (hexane/EtOAc = 10:1) and GPC gave **13gek** as a white solid (Method H': 42% yield).  $^1\text{H}$  NMR (600 MHz,  $\text{CDCl}_3$ )  $\delta$  2.26 (s, 6H), 3.87 (s, 3H), 6.95–6.99 (m, 3H), 7.15 (s, 2H), 7.48 (d,  $J$  = 8.3 Hz, 2H), 7.55 (d,  $J$  = 8.3 Hz, 2H), 7.96 (d,  $J$  = 8.9 Hz, 2H);  $^{13}\text{C}$  NMR (150 MHz,  $\text{CDCl}_3$ )  $\delta$  21.3, 55.4, 114.3, 124.0 (q,  $J_{\text{C-F}}$  = 270.2 Hz), 125.5 (q,  $J_{\text{C-F}}$  = 4.3 Hz), 126.3, 126.9, 128.0, 129.59, 129.60 (q,  $J_{\text{C-F}}$  = 34.5 Hz), 129.9, 134.5, 136.2, 138.0, 152.1, 161.3, 166.1; There is one overlapping carbon signal as 1 peak is missing even with prolonged scans. HRMS (DART)  $m/z$  = 440.1296 calcd for  $\text{C}_{25}\text{H}_{21}\text{F}_3\text{NOS}$   $[\text{M}+\text{H}]^+$ , found: 440.1295.

**4-(4-Chlorophenyl)-2-(4-methoxyphenyl)-5-phenylthiazole (13gja)**

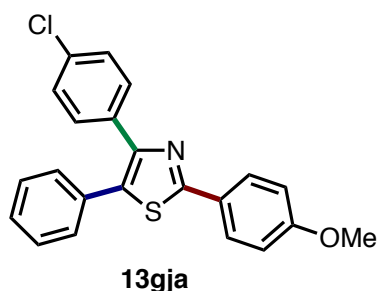

Purification by PTLC (hexane/EtOAc = 10:1) gave **13gja** as a white solid (Method I: 90% yield).  $^1\text{H}$  NMR (600 MHz,  $\text{CDCl}_3$ )  $\delta$  3.86 (s, 3H), 6.96 (d,  $J$  = 8.9 Hz, 2H), 7.26 (d,  $J$  = 8.9 Hz, 2H), 7.31–7.38 (m, 5H), 7.53 (d,  $J$  = 8.3 Hz, 2H), 7.93 (d,  $J$  = 8.9 Hz, 2H);  $^{13}\text{C}$  NMR (150 MHz,  $\text{CDCl}_3$ )  $\delta$  55.4, 114.2, 126.4, 127.9, 128.2, 128.4, 128.8, 129.5, 130.4, 131.9, 132.4, 133.5, 133.6, 149.2, 161.2, 165.6; HRMS (DART)  $m/z$  = 378.0719 calcd for  $\text{C}_{22}\text{H}_{17}\text{ClNOS}$   $[\text{M}+\text{H}]^+$ , found: 378.0719.

**2-(4-Chlorophenyl)-4-(4-Methoxyphenyl)-5-(4-methylphenyl)thiazole (13haa)**

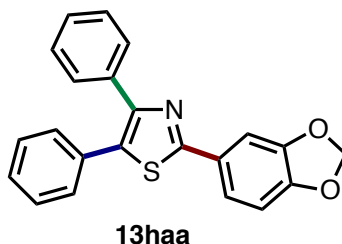

Purification by PTLC (hexane/EtOAc = 10:1) gave **13haa** as a light yellow solid (Method I: 63% yield).  $^1\text{H}$  NMR (600 MHz,  $\text{CDCl}_3$ )  $\delta$  6.02 (s, 2H), 6.86 (d,  $J$  = 7.6 Hz, 1H), 7.27–7.34 (m, 6H), 7.35–7.39 (m, 2H),



**Supporting Information (Tani, Uehara, Yamaguchi, Itami)**  
**Programmed Synthesis of Arylthiazoles through Sequential C–H Couplings**

7.50 (dd,  $J = 8.2, 2.0$  Hz, 1H), 7.54 (d,  $J = 2.0$  Hz, 1H), 7.58 (dd,  $J = 7.6, 2.0$  Hz, 2H);  $^{13}\text{C}$  NMR (150 MHz,  $\text{CDCl}_3$ )  $\delta$  101.5, 106.7, 108.5, 120.9, 127.8, 128.06, 128.11, 128.2, 128.7, 129.1, 129.6, 132.1, 132.3, 134.9, 148.2, 149.2, 150.4, 165.1; HRMS (DART)  $m/z = 358.0902$  calcd for  $\text{C}_{22}\text{H}_{16}\text{NO}_2\text{S}$   $[\text{M}+\text{H}]^+$ , found: 358.0903.

**2-(4-Chlorophenyl)-4,5-diphenylthiazole (13jaa)**

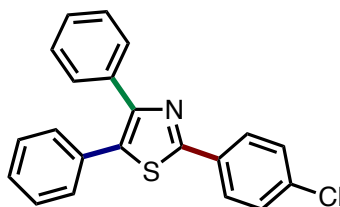

**13jaa**

Purification by PTLC (hexane/EtOAc = 20:1) gave **13jaa** as a light yellow solid (Method H': 58% yield).  $^1\text{H}$  NMR (600 MHz,  $\text{CDCl}_3$ )  $\delta$  7.27–7.35 (m, 6H), 7.38 (dd,  $J = 6.9, 2.8$  Hz, 2H), 7.41 (d,  $J = 8.9$  Hz, 2H), 7.58 (dd,  $J = 8.2, 1.4$  Hz, 2H), 7.94 (d,  $J = 8.2$  Hz, 2H);  $^{13}\text{C}$  NMR (150 MHz,  $\text{CDCl}_3$ )  $\delta$  127.5, 127.9, 128.26, 128.29, 128.7, 129.05, 129.09, 129.5, 131.8, 132.1, 133.4, 134.7, 135.8, 150.9, 164.0; HRMS (DART)  $m/z = 348.0614$  calcd for  $\text{C}_{21}\text{H}_{15}\text{ClNS}$   $[\text{M}+\text{H}]^+$ , found: 344.0615.

**2-(4-Chlorophenyl)-4-(4-Methoxyphenyl)-5-(4-methylphenyl)thiazole (13jgb)**

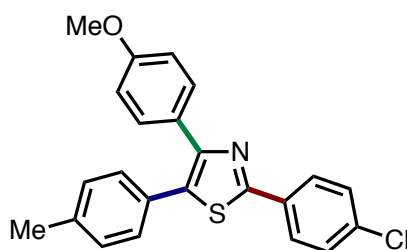

**13jgb**

Purification by PTLC (hexane/EtOAc = 10:1) gave **13jgb** as a light yellow solid (Method I: 46% yield).  $^1\text{H}$  NMR (600 MHz,  $\text{CDCl}_3$ )  $\delta$  2.37 (s, 3H), 3.81 (s, 3H), 6.84 (d,  $J = 8.3$  Hz, 2H), 7.14 (d,  $J = 7.6$  Hz, 2H), 7.28 (d,  $J = 8.3$  Hz, 2H), 7.41 (d,  $J = 8.9$  Hz, 2H), 7.53 (d,  $J = 8.9$  Hz, 2H), 7.93 (d,  $J = 8.3$  Hz, 2H);  $^{13}\text{C}$  NMR (150 MHz,  $\text{CDCl}_3$ )  $\delta$  21.3, 55.2, 113.7, 127.47, 127.50, 129.0, 129.1, 129.4, 129.5, 130.3, 132.2, 132.3, 135.7, 138.1, 150.4, 159.2, 163.5; HRMS (DART)  $m/z = 392.0876$  calcd for  $\text{C}_{23}\text{H}_{19}\text{ClNOS}$   $[\text{M}+\text{H}]^+$ , found: 392.0876.

**4,5-Diphenyl-2-(4-(trifluoromethyl)phenyl)thiazole (13kaa)**



Supporting Information (Tani, Uehara, Yamaguchi, Itami)  
Programmed Synthesis of Arylthiazoles through Sequential C–H Couplings

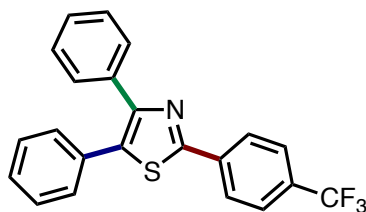

**13kaa**

Purification by PTLC (hexane/EtOAc = 20:1) gave **13kaa** as a white solid (Method H'': 80% yield).  $^1\text{H}$  NMR (600 MHz,  $\text{CDCl}_3$ )  $\delta$  7.28–7.36 (m, 6H), 7.37–7.41 (m, 2H), 7.59 (dd,  $J$  = 7.6, 2.0 Hz, 2H), 7.70 (d,  $J$  = 8.2 Hz, 2H), 8.12 (d,  $J$  = 8.2 Hz, 2H);  $^{13}\text{C}$  NMR (150 MHz,  $\text{CDCl}_3$ )  $\delta$  123.9 (q,  $J_{\text{C-F}}$  = 270.2 Hz), 125.9 (q,  $J_{\text{C-F}}$  = 2.9 Hz), 126.5, 128.0, 128.3, 128.4, 128.8, 129.1, 129.6, 131.5 (q,  $J_{\text{C-F}}$  = 31.6 Hz), 131.6, 134.3, 134.6, 136.7, 151.3, 163.4; HRMS (DART)  $m/z$  = 382.0877 calcd for  $\text{C}_{22}\text{H}_{15}\text{F}_3\text{NS}$   $[\text{M}+\text{H}]^+$ , found: 382.0878.

**4-(4-Methoxyphenyl)-5-(4-methylphenyl)-2-(4-(trifluoromethyl)phenyl)thiazole (13kgb)**

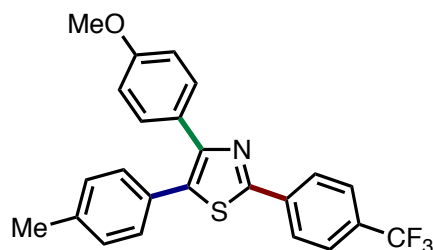

**13kgb**

Purification by PTLC (hexane/EtOAc = 10:1) gave **13kgb** as a light yellow solid (Method H'': 80% yield).  $^1\text{H}$  NMR (600 MHz,  $\text{CDCl}_3$ )  $\delta$  2.38 (s, 3H), 3.82 (s, 3H), 6.86 (d,  $J$  = 8.9 Hz, 2H), 7.16 (d,  $J$  = 8.2 Hz, 2H), 7.29 (d,  $J$  = 8.3 Hz, 2H), 7.54 (d,  $J$  = 8.9 Hz, 2H), 7.70 (d,  $J$  = 8.2 Hz, 2H), 8.11 (d,  $J$  = 8.3 Hz, 2H);  $^{13}\text{C}$  NMR (150 MHz,  $\text{CDCl}_3$ )  $\delta$  21.3, 55.2, 113.7, 124.0 (q,  $J_{\text{C-F}}$  = 273.1 Hz), 125.9 (q,  $J_{\text{C-F}}$  = 4.3 Hz), 126.5, 127.3, 128.9, 129.4, 129.5, 130.3, 131.3 (q,  $J_{\text{C-F}}$  = 33.1 Hz), 133.2, 136.8, 138.3, 150.8, 159.4, 162.9; HRMS (DART)  $m/z$  = 426.1139 calcd for  $\text{C}_{24}\text{H}_{19}\text{F}_3\text{NOS}$   $[\text{M}+\text{H}]^+$ , found: 426.1137.

**Methyl 4-(4,5-diphenylthiazol-2-yl)benzoate (13naa)**

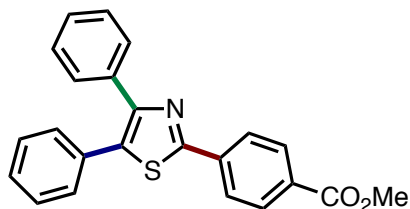

**13naa**

Purification by PTLC (hexane/EtOAc = 10:1) gave **13naa** as a light yellow solid (Method I: 45% yield).  $^1\text{H}$  NMR (600 MHz,  $\text{CDCl}_3$ )  $\delta$  3.95 (s, 3H), 7.29–7.36 (m, 6H), 7.39 (dd,  $J$  = 6.8, 2.0 Hz, 2H), 7.60 (dd,  $J$  = 7.6, 2.0 Hz, 2H), 8.08 (d,  $J$  = 8.9 Hz, 2H), 8.12 (d,  $J$  = 8.2 Hz, 2H);  $^{13}\text{C}$  NMR (150 MHz,  $\text{CDCl}_3$ )  $\delta$  52.3, 126.2, 128.0, 128.3, 128.4, 128.8, 129.1, 129.6, 130.2, 131.1, 131.7, 134.3, 134.6, 137.4, 151.3, 163.9, 166.5;



**Supporting Information (Tani, Uehara, Yamaguchi, Itami)**  
**Programmed Synthesis of Arylthiazoles through Sequential C–H Couplings**

HRMS (DART)  $m/z$  = 372.1058 calcd for  $C_{23}H_{18}NO_2S$   $[M+H]^+$ , found: 372.1060.

**Methyl 4-(5-(4-Methoxyphenyl)-4-(4-methylphenyl)thiazol-2-yl)benzoate (13nbg)**

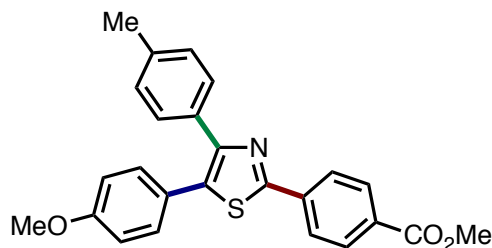

**13nbg**

Purification by PTLC (hexane:EtOAc = 5:1) gave **13nbg** as a yellow solid (Method I: 87% yield).  $^1H$  NMR (600 MHz,  $CDCl_3$ )  $\delta$  2.35 (s, 3H), 3.82 (s, 3H), 3.94 (s, 3H), 6.87 (d,  $J$  = 8.2 Hz, 2H), 7.12 (d,  $J$  = 7.6 Hz, 2H), 7.31 (d,  $J$  = 8.3 Hz, 2H), 7.50 (d,  $J$  = 7.6 Hz, 2H), 8.06 (d,  $J$  = 8.9 Hz, 2H), 8.10 (d,  $J$  = 8.3 Hz, 2H);  $^{13}C$  NMR (150 MHz,  $CDCl_3$ )  $\delta$  21.3, 52.2, 55.3, 114.2, 124.0, 126.1, 128.9, 129.0, 130.2, 130.78, 130.84, 132.0, 133.7, 137.59, 137.64, 150.9, 159.6, 163.1, 166.6; HRMS (DART)  $m/z$  = 416.1320 calcd for  $C_{25}H_{22}NO_3S$   $[M+H]^+$ , found: 416.1320.

**2-(4-Acetylphenyl)-5-(4-methylphenyl)-4-phenylthiazole (13oab)**

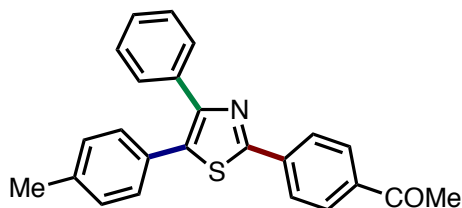

**13oab**

Purification by PTLC (hexane/EtOAc = 3:1) gave **13oab** as a yellow solid (Method I: 82% yield).  $^1H$  NMR (600 MHz,  $CDCl_3$ )  $\delta$  2.37 (s, 3H), 2.63 (s, 3H), 7.14 (d,  $J$  = 8.2 Hz, 2H), 7.28 (d,  $J$  = 8.2 Hz, 2H), 7.29–7.35 (m, 3H), 7.61 (dd,  $J$  = 7.6, 1.4 Hz, 2H), 8.02 (d,  $J$  = 8.2 Hz, 2H), 8.09 (d,  $J$  = 8.2 Hz, 2H);  $^{13}C$  NMR (150 MHz,  $CDCl_3$ )  $\delta$  21.3, 26.7, 126.3, 127.9, 128.3, 128.6, 129.0, 129.1, 129.4, 129.5, 134.7, 134.8, 137.6, 137.7, 138.4, 151.1, 163.4, 197.3; HRMS (DART)  $m/z$  = 370.1266 calcd for  $C_{24}H_{20}NOS$   $[M+H]^+$ , found: 370.1264.

**4,5-Diphenyl-2-(4-pyridyl)thiazole (13uaa)**

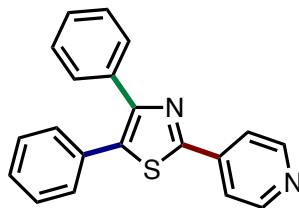

**13uaa**





**Supporting Information (Tani, Uehara, Yamaguchi, Itami)**  
**Programmed Synthesis of Arylthiazoles through Sequential C–H Couplings**

Purification by PTLC (hexane/EtOAc = 2:1) gave **13uaa** as a light yellow solid (Method H'': 53% yield). <sup>1</sup>H NMR (600 MHz, CDCl<sub>3</sub>) δ 7.30–7.37 (m, 6H), 7.40 (dd, *J* = 6.9, 2.8 Hz, 2H), 7.59 (dd, *J* = 8.3, 1.4 Hz, 2H), 7.86 (dd, *J* = 6.4, 2.0 Hz, 2H), 8.72 (dd, *J* = 6.4, 2.0 Hz, 2H); <sup>13</sup>C NMR (150 MHz, CDCl<sub>3</sub>) δ 120.1, 128.1, 128.4, 128.6, 128.8, 129.0, 129.6, 131.4, 134.4, 135.0, 140.2, 150.6, 151.6, 162.3; HRMS (DART) *m/z* = 315.0956 calcd for C<sub>20</sub>H<sub>15</sub>N<sub>2</sub>S [M+H]<sup>+</sup>, found: 315.0959.

**4-(4-Chlorophenyl)-5-phenyl-2-(2-pyrazin-2-yl)thiazole (13vja)**

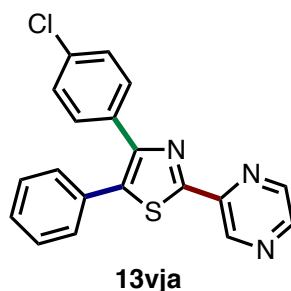

Purification by PTLC (hexane/EtOAc = 3:1) gave **13vja** as a light yellow oil (Method I: 86% yield). <sup>1</sup>H NMR (600 MHz, CDCl<sub>3</sub>) δ 7.30 (d, *J* = 8.3 Hz, 2H), 7.32–7.42 (m, 5H), 7.54 (d, *J* = 8.3 Hz, 2H), 8.56 (d, *J* = 1.4 Hz, 1H), 8.61 (d, *J* = 2.0 Hz, 1H), 9.50 (s, 1H); <sup>13</sup>C NMR (150 MHz, CDCl<sub>3</sub>) δ 128.6, 128.8, 129.0, 129.5, 130.3, 131.4, 133.0, 134.0, 137.0, 141.4, 143.8, 145.1, 146.8, 150.4, 163.7; HRMS (DART) *m/z* = 350.0519 calcd for C<sub>19</sub>H<sub>13</sub>ClN<sub>3</sub>S [M+H]<sup>+</sup>, found: 350.0519.

**Gram Scale Synthesis of Triarylthiazole**

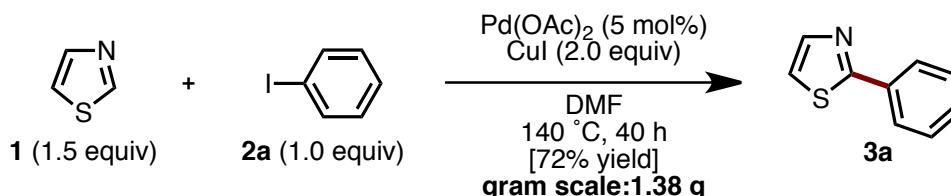

A 50-mL sealed tube vessel were added Pd(OAc)<sub>2</sub> (134.8 mg, 0.6 mmol, 5 mol%), CuI (4.57 g, 24 mmol, 2 equiv), iodobenzene (**2a**: 2.45 g, 12 mmol, 1.0 equiv), thiazole (**1**: 1.53 g, 18 mmol, 1.5 equiv) and DMF (24 mL). The vessel was sealed and then stirred at 140 °C for 40 h. After cooling the reaction mixture to room temperature, the mixture was quenched with 1M NaOH aq. (15 mL), neutralized by sat. NH<sub>4</sub>Cl aq. (10 mL), and added water (25 mL) and EtOAc (50 mL). The mixture was extracted by EtOAc (50 mL × 2), combined organic layer was washed with water (50 mL × 2) and brine (50 mL), dried over Na<sub>2</sub>SO<sub>4</sub>. The organic layer was evaporated and the residue was purified by flash column chromatography to afford 2-phenylthiazole (**3a**). Finally, distillation gave desired product (Method A: 1.38 g, 72% yield) as a colorless oil.

**Supporting Information (Tani, Uehara, Yamaguchi, Itami)**  
**Programmed Synthesis of Arylthiazoles through Sequential C–H Couplings**

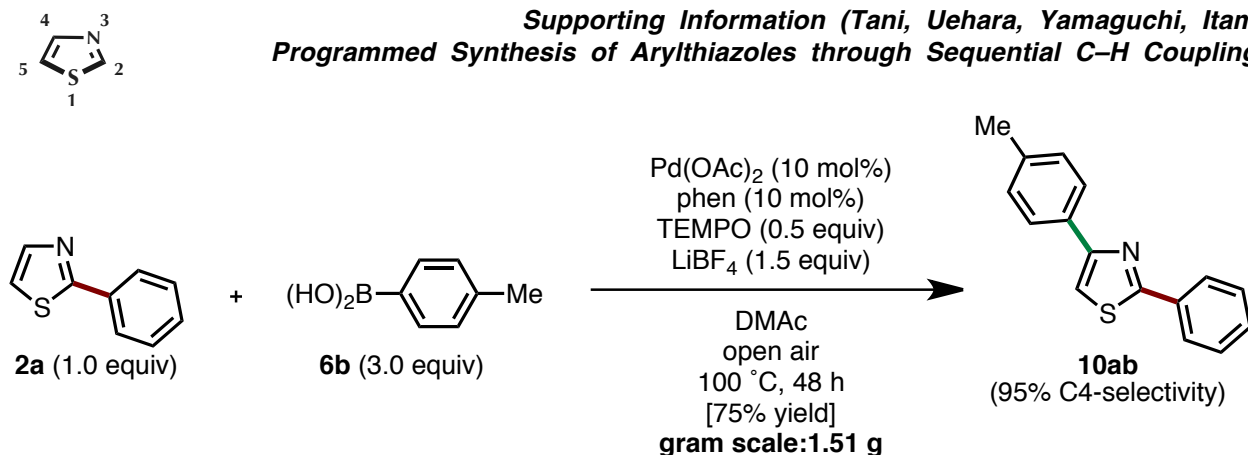

A 100-mL flask, containing a magnetic stirring bar, was added Pd(OAc)<sub>2</sub> (179.6 mg, 0.8 mmol, 10 mol%), 1,10-phenanthroline (144.2 mg, 0.8 mmol, 10 mol%), 4-methylphenylboronic acid (**6b**: 3.26 g, 24 mmol, 3 equiv), LiBF<sub>4</sub> (1.13 g, 12 mmol, 1.5 equiv), TEMPO (613 mg, 4 mmol, 0.5 equiv), the corresponding 2-phenylthiazole (**2a**: 1.29 g, 8 mmol, 1.0 equiv) and undried DMAc (16 mL). The vessel was equipped with vigreux column (for open air condition) and then stirred at 100 °C for 48 h under air. After cooling the reaction mixture to room temperature, the mixture was added water (40 mL) and EtOAc (40 mL). After further more extraction by EtOAc (40 mL × 2), combined organic layer was washed with water (40 mL × 2) and brine (40 mL), dried over Na<sub>2</sub>SO<sub>4</sub>. The organic layer was evaporated and the residue was purified by flash column chromatography to afford **10ab** (Method F: 1.51 g, 75% yield) as a light yellow solid.

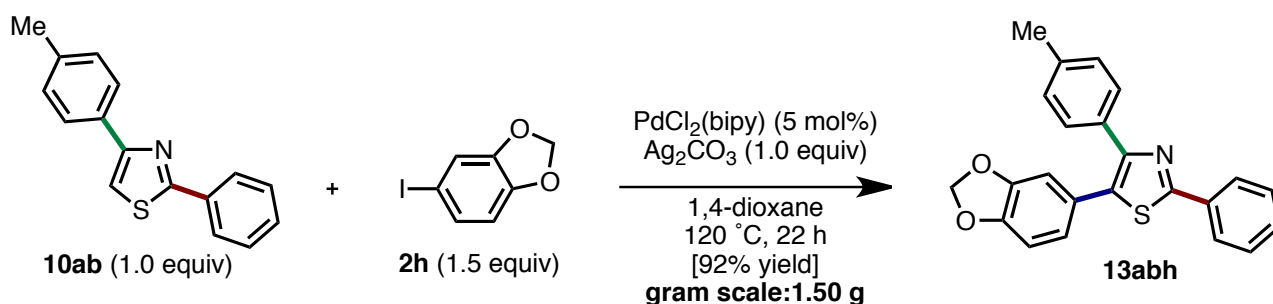

A 100-mL sealed tube, containing a magnetic stirring bar, was flame-dried under vacuum and filled with argon after cooling to room temperature. To this vessel were added PdCl<sub>2</sub>(bipy) (75.2 mg, 0.23 mmol, 5 mol%), Ag<sub>2</sub>CO<sub>3</sub> (1.25 g, 4.5 mmol, 1.0 equiv), 5-iodobenzo[d][1,3]dioxole (**2h**: 1.67 g, 6.75 mmol, 1.5 equiv), **10ab** (1.13 g, 4.5 mmol, 1.0 equiv) and 1,4-dioxane (18 mL, 0.2~0.25 M) under a stream of argon. The vessel was sealed and then stirred at 120 °C for 22 h. After cooling the reaction mixture to room temperature, the mixture was passed through a short silica gel pad (EtOAc). The filtrate was evaporated and the residue was purified by flash column chromatography to afford **13abh** as a light yellow solid (Method G: 1.50g, 92% yield). <sup>1</sup>H NMR (600 MHz, CDCl<sub>3</sub>) δ 2.33 (s, 3H), 5.94 (s, 2H), 6.75 (d, *J* = 8.3 Hz, 1H), 6.82 (s, 1H), 6.88 (d, *J* = 8.3 Hz, 1H), 7.11 (d, *J* = 7.6 Hz, 2H), 7.36–7.46 (m, 3H), 7.50 (d, *J* = 8.3 Hz, 2H), 7.97 (d, *J* = 6.9 Hz, 2H); <sup>13</sup>C NMR (150 MHz, CDCl<sub>3</sub>) δ 21.3, 101.3, 108.6, 109.9, 123.5, 125.7, 126.3, 128.8, 128.9, 129.0, 129.8, 132.0, 132.2, 133.6, 137.5, 147.6, 147.8, 150.5, 164.8; HRMS (DART) *m/z* = 372.1058 calcd for C<sub>23</sub>H<sub>18</sub>NO<sub>2</sub>S [M+H]<sup>+</sup>, found: 372.1058.
